1 **Mobile monitoring of traffic-related air pollution for a prospective cohort study in the**  
2 **greater Seattle area**

3

4 Magali N. Blanco,<sup>a</sup> Amanda Gasset,<sup>a</sup> Timothy Gould,<sup>b</sup> Annie Doubleday,<sup>a</sup> David L. Slager,<sup>a</sup>

5 Elena Austin,<sup>a</sup> Edmund Seto,<sup>a</sup> Timothy Larson,<sup>a,b</sup> Julian Marshall,<sup>b</sup> Lianne Sheppard<sup>a,c</sup>

6

7

8 <sup>a</sup>Department of Environmental and Occupational Health Sciences, School of Public Health,

9 University of Washington, Hans Rosling Center for Population Health, 3980 15th Ave NE,

10 Seattle, WA 98195

11

12 <sup>b</sup>Department of Civil & Environmental Engineering, College of Engineering, University of

13 Washington, 201 More Hall, Box 352700, Seattle, WA 98195

14

15 <sup>c</sup>Department of Biostatistics, School of Public Health, University of Washington, Hans Rosling

16 Center for Population Health, 3980 15th Ave NE, Seattle, WA 98195

17

18  
19  
20  
21  
22  
23  
24  
25  
26  
27  
28  
29  
30  
31  
32  
33  
34  
35  
36  
37

## Abstract

Growing evidence links traffic-related air pollution (TRAP) to adverse health effects. Previous air pollution studies focused on a few commonly measured pollutants with poor spatial resolution. Well-designed mobile monitoring studies may address this limitation. We designed an extensive mobile monitoring campaign to characterize TRAP exposure levels for a Seattle-based cohort, the Adult Changes in Thought (ACT) study. The campaign measured particulate matter  $\leq 2.5 \mu\text{m}$  in diameter ( $\text{PM}_{2.5}$ ), ultrafine particulates (UFP), black carbon (BC), nitrogen dioxide ( $\text{NO}_2$ ) and carbon dioxide ( $\text{CO}_2$ ) at 309 stop locations representative of the cohort. We collected about 29 two-minute measures at each location during all seasons, days of the week, and most times of day for a one-year period. Annual average concentrations of UFPs had similar degrees of spatial variability as BC and  $\text{NO}_2$  but higher degrees of variability as  $\text{CO}_2$  and  $\text{PM}_{2.5}$ . UFPs had less temporal variability than other pollutants. Validation showed good agreement between our BC,  $\text{NO}_2$ , and  $\text{PM}_{2.5}$  measurements and regulatory monitoring sites. The results from this campaign will be used to assess TRAP exposure in the ACT cohort.

Synopsis: We assessed annual-average traffic-pollutant levels with high spatial resolution at locations representative of participant residences using a temporally balanced short-term mobile monitoring campaign.

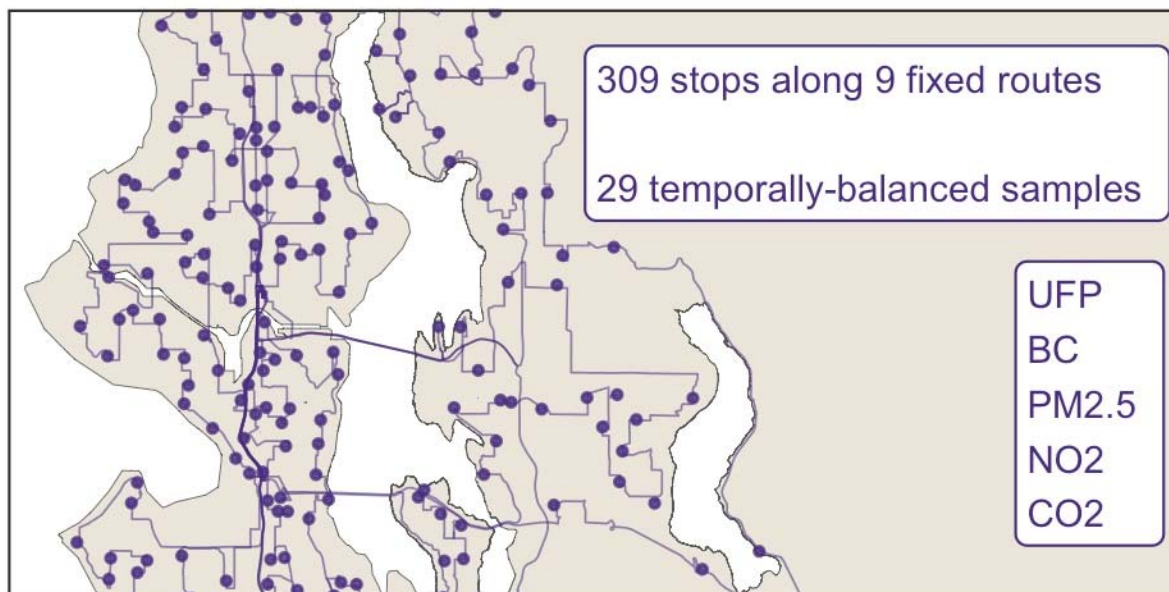

## 39 1 Introduction

40

41 An extensive body of evidence has linked air pollution to adverse health effects including  
42 respiratory, cardiovascular and mortality outcomes.<sup>1</sup> Recent evidence has begun to link traffic-  
43 related air pollution (TRAP) exposure to cognitive function among various populations,  
44 including the elderly.<sup>2-4</sup> While TRAP is a complex mixture that varies over time and space,  
45 pollutants include ultrafine particles (UFP; typically defined as aerodynamic diameter  $\leq 100$   
46 nm), black carbon (BC), oxides of nitrogen including nitrogen dioxide (NO<sub>2</sub>), and carbon dioxide  
47 (CO<sub>2</sub>).<sup>5</sup> UFPs are increasingly associated with important health outcomes including more  
48 neurotoxicity and systemic inflammation than larger particles.<sup>6-12</sup>

49 To date, however, much of the epidemiology air pollution research has been limited to  
50 the federally defined criteria air pollutants, monitored nationwide through the EPA's regulatory  
51 Air Quality System (AQS) monitoring network. This network has monitored criteria pollutant  
52 levels throughout the US since the 1990s, and none specifically include UFPs.<sup>13</sup> Furthermore,  
53 this network is spatially sparse and thus fails to capture the spatial variability of more quickly  
54 decaying pollutants, including many TRAPs.<sup>14</sup> The Seattle Census Urbanized Area, for example,  
55 averages about 1 monitor every 174 km<sup>2</sup> (~14 active monitors within a land area of about 2,440  
56 km<sup>2</sup>), most of which measure fine particulate matter with diameter of less than 2.5  $\mu\text{m}$  (PM<sub>2.5</sub>)  
57 and BC.<sup>15,16</sup>

58 Mobile monitoring campaigns for assessing air pollution exposure have been used since  
59 at least the 1970s and have become increasingly common in recent years in an effort to address  
60 the limitations of traditional fixed site monitoring approaches.<sup>4317-23</sup> Typically, a vehicle is  
61 equipped with air monitors capable of measuring pollutants with high temporal resolution. Short-  
62 term sampling repeatedly occurs with this platform at predefined locations. Past work has shown

63 that repeated short-term air pollution samples can be used to calculate unbiased long-term  
64 averages, thus reducing the need for continuous fixed-site monitoring.<sup>17,18</sup> Because the sampling  
65 duration at individual locations can be quite short, campaigns can increase their spatial coverage  
66 with a single platform, thus making this approach more time- and cost- efficient than traditional  
67 fixed-site monitoring.

68 Still, the designs of past mobile monitoring campaigns have arguably limited their  
69 epidemiologic application. Importantly, most campaigns have sampled during limited time  
70 periods, for example, weekday business hours during one to three seasons.<sup>19,24–26</sup> We previously  
71 showed that these limited sampling campaigns likely result in biased long-term human exposure  
72 estimates because they do not capture the high temporal variability of many TRAPs, and that the  
73 exact degree of bias varies (is not consistent) across site.<sup>27</sup> Additionally, many campaigns have  
74 sampled along non-residential areas such as highways and industrial areas where air pollution  
75 levels may be much higher than the levels that most people are exposed to. Furthermore, most  
76 have collected non-stationary (mobile) on-road samples rather than stationary samples along the  
77 side of the road closer to participant residences. While non-stationary designs increase spatial  
78 coverage, further work is needed to demonstrate whether these are representative of residential  
79 human exposure levels.<sup>19,28</sup>

80 To address the limitations of past campaigns, we designed an extensive, multi-pollutant  
81 mobile monitoring campaign to characterize TRAP exposure levels for the Adult Changes in  
82 Thought (ACT) study cohort. ACT is a long-standing, prospective cohort study that has been  
83 investigating aging and brain health in the greater Seattle area since 1995.<sup>29</sup> The campaign  
84 measured TRAP at locations representative of the cohort including 309 stops and thousands of  
85 miles worth of on-road measurements in a temporally balanced approach throughout the course

86 of a year. The goal of this paper is to describe the mobile monitoring design's sampling  
87 methodology and to summarize the TRAP measures and spatial covariates associated with TRAP  
88 in our study region. To the best of our knowledge, this is one of the most extensive mobile  
89 monitoring campaigns conducted in terms of the pollutants measured, the spatial coverage and  
90 resolution, and the campaign duration and sampling frequency. This campaign will support  
91 future epidemiologic investigations of TRAP exposure in the ACT cohort.

92

## 93 2 Methods

94

95 Briefly, multiple pollutants including UFP, BC, PM<sub>2.5</sub>, NO<sub>2</sub> and CO<sub>2</sub> were  
96 simultaneously measured with high quality instrumentation at 309 stationary (stop) locations  
97 along the side of the road. Locations were representative of the cohort's large spatial and  
98 geographical distribution throughout the greater Seattle area. Fixed driving routes were  
99 developed to additionally collect thousands of miles of non-stationary, on-road measurements  
100 between stop locations. A temporally balanced, year-long driving schedule that measured TRAP  
101 during all seasons, days of the week, and most times of the day enabled us to estimate unbiased  
102 annual average estimates at the site level. Details are described below.

103

### 104 2.1 Spatial Compatibility of the Selected Stop Locations and the ACT Cohort

105

106 We selected a mobile monitoring region in the greater Seattle, WA area that was roughly  
107 1,200 land km<sup>2</sup> (463 mi<sup>2</sup>; Figure 1). The monitoring region was composed of Census Tracts  
108 where the majority of the ACT cohort had historically resided between 1989-2018 (87% =

109 10,330/11,904 locations). This large region fell in western King County and southwest  
110 Snohomish County, and it included a variety of urban and rural areas with various land uses  
111 including residential, industrial, commercial, and downtown areas. We used the Location-  
112 Allocation tool in ArcMap (ArcGIS v. 10.5.1)<sup>30</sup> to select 304 sampling locations within the  
113 monitoring region that were representative of the ACT cohort (approximately one monitoring  
114 location per 33 participant locations; see Supplementary Information [SI] Note S1 for details).  
115 Stops were selected to maximize the spatial coverage within the monitoring region while  
116 minimizing the distance between sampled stops and cohort locations. Five additional stops were  
117 collocations at nearby regulatory air quality monitoring sites measuring pollutants similar to our  
118 platform (see below). In total, there were 309 stops. The average (SD) distance between a cohort  
119 location and the nearest monitoring stop was 611 (397) m. To ensure that the monitoring stops  
120 and cohort locations were spatially compatible, we compared the distribution of various TRAP-  
121 related covariates at these locations (Figure 2).<sup>31</sup>

122

It is made available under a [CC-BY-NC-ND 4.0 International license](https://creativecommons.org/licenses/by-nc-nd/4.0/).

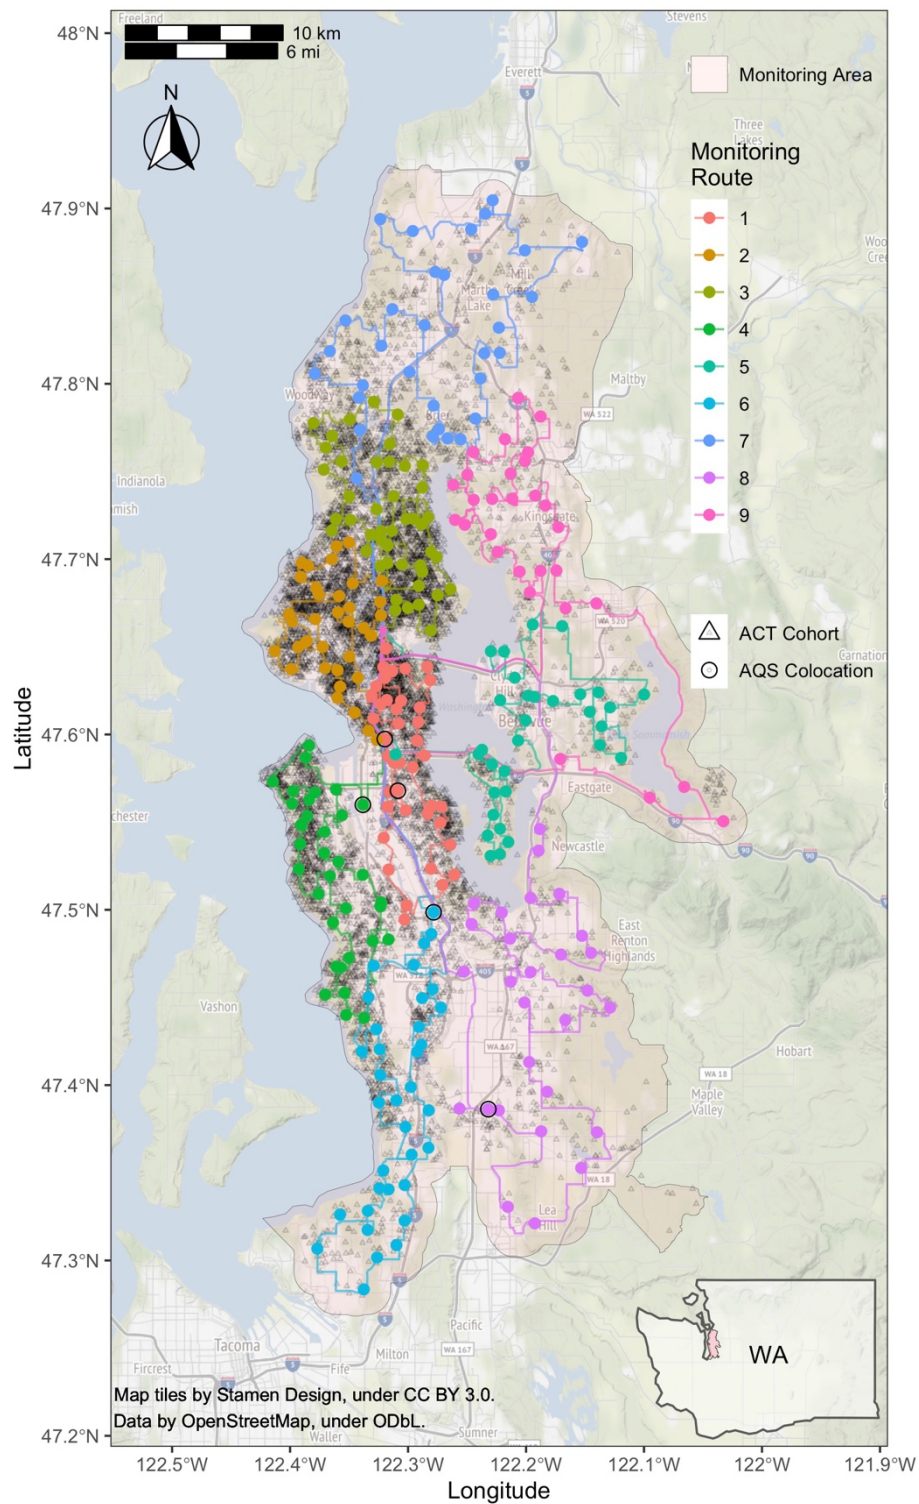

123  
124 *Figure 1. Mobile monitoring routes (n=309 stops along 9 routes) and jittered ACT cohort locations (n=10,330 unique locations).*  
125 *Inset map shows the monitoring location within Washington (WA) state.*



126

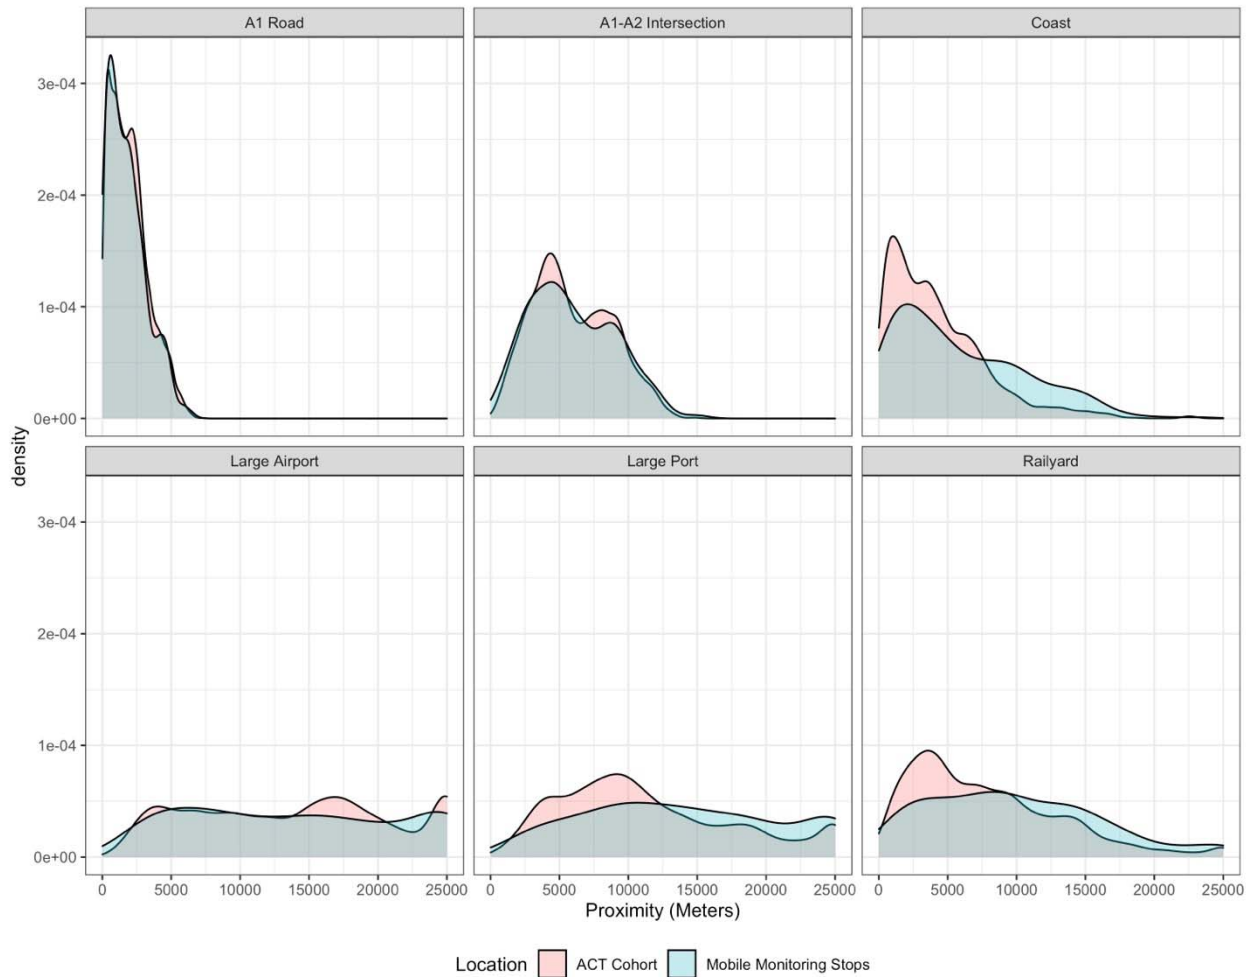

127

128 *Figure 2. Covariate distributions of mobile monitoring stops (n=309) and ACT cohort locations (n=10,330)*

129

## 130 2.2 Fixed Routes

131

132 We used ArcMap's Network Analyst New Route tool<sup>30</sup> and Google Maps<sup>32</sup> to develop  
133 nine fixed routes based on the 309 stop monitoring locations (SI Note S1). Each route ranged  
134 from 75-168 km (47-104 miles) in length and had 28-40 stops (SI Table S1). All routes started  
135 and ended at the University of Washington and were intended to maximize residential driving

136 coverage (i.e., reduce highway driving and driving on the same roads). Routes were downloaded  
137 from Google Maps to a smart phone and Garmin GPS Navigation System and navigation was set  
138 to replicate the same route each time regardless of traffic conditions. SI Figure S1 shows the  
139 distribution of various TRAP-related covariates on 100 m on-road segments and cohort  
140 locations. As before with the stop locations (Figure 2), road segments had similar geocovariate  
141 distributions as ACT cohort locations, indicating that these were spatially compatible.

142

### 143 2.3 Sampling Schedule

144

145 Sampling was planned to cover an entire year and was conducted from March 2019  
146 through March 2020 during all seasons and days of the week between the hours of 4 AM and 11  
147 PM. Our previous work has shown that this balanced but slightly reduced sampling schedule  
148 taking driver safety and operational logistics into consideration should still generally produce  
149 unbiased annual averages.<sup>27</sup> To increase temporal coverage, routes were started at different times  
150 of the day and driven in both clockwise and counterclockwise directions. A single route was  
151 driven each day (~4-8 drive hours). Make-up routes were conducted throughout the study to  
152 resample sites with missing readings (i.e., due to instrumentation or driver errors). Make-up  
153 routes occurred during similar times as the originally scheduled sampling time (i.e., season, day  
154 of the week, general time of day).

155 Twenty-eight two-minute samples were scheduled to be collected at each location while  
156 the vehicle was parked along the side of the road. This design choice was justified by our  
157 additional analyses of one-minute data from a near-road and a background regulatory site in  
158 Seattle. These analyses showed that at least 25 two-minute samples were sufficient to produce

159 annual average estimates with a low average percent error (See SI Figure S2). Furthermore, there  
160 was only a negligible improvement in annual average estimates when the sampling duration was  
161 extended from 2 to 60 minutes.

162

## 163 2.4 Data Collection

164

165 We equipped a Toyota Prius hybrid vehicle with fast-response (1-60 sec), high-quality  
166 instrumentation that measured various particle and gas pollutants. Pollutants included UFPs of  
167 various size ranges (see Table 1 for size details; instruments were: TSI NanoScan 3910, TSI P-  
168 TRAK 8525 with and without a diffusion screen, and Testo DiSCmini), BC (AethLabs MA200),  
169 PM<sub>2.5</sub> (Radiance Research M903 nephelometer), NO<sub>2</sub> (Aerodyne Research Inc. CAPS) and CO<sub>2</sub>  
170 (Li-Cor LI-850). SI Table S2 for instrumentation details. Note that we refer to “UFP” counts  
171 even though instruments measured particles larger than 100 nm in diameter since most particles  
172 by count are smaller than 100 nm. Carbon monoxide (CO) was also collected, but measurements  
173 did not meet our quality standards and were not subsequently used. The platform additionally  
174 collected temperature, relative humidity, and global positioning with real-time tracking. We had  
175 duplicates (back-ups) of every instrument type that were periodically collocated for quality  
176 assurance purposes (see Quality Assurance and Quality Control section below). Instruments were  
177 in the back of the vehicle where they were powered by two rechargeable batteries and connected  
178 to gas- or particle- specific manifolds (SI Figure S3-S4). These were connected to a rooftop inlet  
179 facing the front of the car used to collect ambient air samples. Instrument clocks were all  
180 synchronized at the beginning of each drive within ~2 seconds. Instruments were started within  
181 an hour before the start of each drive and continuously run until the end of the route.

182 Drivers were instructed to follow the specific Google Map route directions and to take  
183 notes of any field anomalies (e.g., sampling behind a school bus or next to a construction site).

184 Instrument data files were uploaded to a secure data management system (MySQL) after  
185 each drive using standardized naming conventions to automate data uploads and the generation  
186 of daily data reports (see SI Note S2 for further details).

187

## 188 2.5 Summary Measures

189

190 We calculated the median pollutant concentrations for each two-minute site visit. While  
191 means can be highly influenced by large concentration deviations (which may be important in  
192 some settings), medians are more robust to outliers and may better capture the typical values of  
193 skewed data.

194 We estimated UFP concentrations for particles 20-36 nm in diameter by calculating the  
195 difference between the unscreened (20-1,000 nm) and screened (36-1,000 nm) P-TRAK  
196 readings.

197 We estimated  $PM_{2.5}$  concentrations from nephelometer readings using a calibration curve  
198 fit to regulatory monitoring data between 1998-2017 (SI Equation S1). Nephelometer light  
199 scattering is strongly correlated with  $PM_{2.5}$  and has been used in the Puget Sound region to  
200 monitor air quality since 1967.<sup>33</sup> We fit the model using daily average measurements from nine  
201 non-industrial regulatory air monitoring sites in the region where both  $PM_{2.5}$  (using federal  
202 reference methods) and nephelometer light scattering data were collected. We excluded the years  
203 2008-2009 due to nephelometer instrumentation issues noted by the local regulatory agency. The

204 model's leave-one-site-out cross-validated  $R^2$  and root mean square error (RMSE) were 0.92 and  
205  $1.97 \mu\text{g}/\text{m}^3$ , respectively.

206 To gain an overall assessment of the relative importance of the three types of particles  
207 and two gases, we scaled pollutant concentrations based on each pollutant's distribution (score =  
208 [value-median]/interquartile range) and aggregated at each site (the sum of scores) to  
209 characterize overall spatial air pollution trends. In addition to the  $\text{PM}_{2.5}$  and BC particle  
210 measures, with multiple UFP instrument data available in our study, we focused our analysis on  
211 total UFP as measured by one of the instruments, the P-TRAK (20-1,000 nm particles).

212 We used Lasso regression to characterize the geographic covariates most strongly  
213 associated with pollutant concentrations. Cross-validation was used to select the tuning  
214 parameter, lambda. Covariates included various indicators of land use, population density, green  
215 space, built environment and others (see SI Table S10 for details). There were 835 initial  
216 geographic covariates (geocovariates) that were reduced to 183 as follows.<sup>34</sup> First, we excluded  
217 variables if they lacked variability (less than 20% of the data were different from the most  
218 common value) since these were not likely to improve, and could even worsen, the model fit.  
219 Next, we excluded all land use proportion variables where the maximum proportion observed in  
220 the data was less than 10%. Low values for these variables indicated that these land use types  
221 made up a small fraction of the land relative to other land use variables and would not likely  
222 have a meaningful impact on observed pollutant concentrations. We dropped variables if their  
223 distribution at monitoring sites was very different than their distribution at ACT cohort locations  
224 in an effort to reduce model extrapolation later on. This included variables where the standard  
225 deviation (SD) in the ACT cohort was more than five times the SD of the mobile monitoring  
226 data. We dropped variables if too many outliers were observed in the data (>2% of the total

227 data). Finally, we log-transformed proximity variables to better model pollutant exponential  
228 decay with increasing source distance.

229

## 230 2.6 Quality Assurance and Quality Control

231

232 We conducted various quality assurance and quality control (QAQC) activities  
233 throughout the study period to ensure the reliability and integrity of our data. Activities included  
234 calibrating gas instruments; checking particle instruments for zero concentration responses;  
235 assessing collocated instruments for agreement; inspecting time series data for concentration  
236 pattern anomalies; and dropping readings associated with instrument error codes or those outside  
237 the instrument measurement range. SI Note S2 has additional details. Site visit medians (~2 min)  
238 and annual averages for BC, NO<sub>2</sub> and PM<sub>2.5</sub> estimated from these data were additionally  
239 compared against estimates from the five regulatory air monitoring collocation sites.

240

241 Computing details are in SI Note S3.

242

## 243 3 Results

244

### 245 3.1 Data Collected

246

247 In total, the campaign collected about 1,367 hours of data (driving and stopped) along  
248 approximately 34,335 km (21,347 mi), or 6,786 100 m road segments along non-A1 roads (SI

249 Table S1). Each route was driven on 30-35 different occasions. After dropping stop  
250 concentrations that did not meet the quality assurance standards (0.61%), the final analyses  
251 included over 70,000 two-minute median stop samples (almost 9,000 samples per instrument)  
252 collected over the course of 288 drive days from 309 monitoring sites (Table S7).

253 Sites were sampled an average of 29 times, ranging from 26 to 35 times. Due to the  
254 logistical constraints of sampling 309 sites with one platform, some locations were visited fewer  
255 times of the day than other locations, though sampling times were still well distributed  
256 throughout the day (e.g., morning [e.g., 7 AM], afternoon [e.g., 3 PM] and evening [e.g., 8 PM];  
257 see SI Figure S7).

258

### 259 3.2 Stop Visits

260

261 SI Table S6 shows the distribution of median site visit pollutant concentrations for all of  
262 the two-minute visits ( $N = 309$  sites  $\times$   $\sim 29$  visits/site). As a result of UFP particle size  
263 distributions, instruments that captured smaller particles more efficiently typically reported  
264 higher total concentrations. Ratios of the 95<sup>th</sup> to 5<sup>th</sup> quantile concentrations (“Q95/Q05”) show  
265 that BC, NO<sub>2</sub> and UFPs saw the greatest concentration variability across sites and visits, while  
266 CO<sub>2</sub> and PM<sub>2.5</sub> had relatively lower variability. All UFP measures had relatively high variability,  
267 though there were some differences associated with different instruments.

268 The SI shows the pollutant measurements collected during each visit by site ( $\sim 29$   
269 visits/site; Table S8, Figure S8-S9). There was a high degree of variability within most sites,  
270 between sites, and for different pollutants. UFP instruments measuring smaller particles were

271 more likely to report higher readings and thus higher levels of within-site variability. Once again,  
272 UFPs, BC and NO<sub>2</sub> had more within-site variability (see “Min/Max” IQR ratio in SI Table S8).

273 As expected, pollutant concentrations varied temporally throughout the study period (SI  
274 Figure S10-S13). Fall, for example, generally had relatively higher pollutant concentrations than  
275 summer and winter. Weekends generally had lower concentrations than weekdays. Midday hours  
276 generally had lower concentrations than surrounding hours.

277 Pollutant-specific Analysis of Variance (ANOVA) models of visit concentrations (SI  
278 Table S9) indicated most of the variability seen occurred within sites, rather than across sites or  
279 over time. UFPs had the highest within-site variability (~86-90% of the total) while NO<sub>2</sub> had the  
280 least (~67%). Relatively speaking, NO<sub>2</sub> and UFP visit concentrations had the most spatial  
281 variability, while PM<sub>2.5</sub> had the least. NO<sub>2</sub> and BC had the most daily variability, while PM<sub>2.5</sub>  
282 once again had the least. CO<sub>2</sub> and NO<sub>2</sub> had the most hourly variability, while UFPs had the least.  
283 Finally, CO<sub>2</sub> had the most seasonal variability while UFPs had the least.

284

### 285 3.3 Annual Averages

286

287 Estimated annual average pollutant concentrations across all monitoring sites are shown  
288 in Table 1 and Figure S14. There was roughly a 5- to 9- fold difference between the lowest and  
289 highest UFP site concentrations. On the other hand, NO<sub>2</sub> and BC concentrations had a 6-fold  
290 difference across sites, PM<sub>2.5</sub> had a 2-fold difference, while CO<sub>2</sub> varied little across sites. The  
291 IQR to median ratio similarly indicated that UFPs, BC and NO<sub>2</sub> had the highest relative annual  
292 average variability across site, while PM<sub>2.5</sub> and CO<sub>2</sub> had the lowest variability.

293



294 *Table 1. Distribution of annual average pollutant concentrations across monitoring sites (N = 309).*

| <b>Pollutant</b>                             | <b>Instrument</b> | <b>Min</b> | <b>Q05</b> | <b>Q25</b> | <b>Median</b> | <b>Q75</b> | <b>Q95</b> | <b>Max</b> | <b>Max/Min</b> |
|----------------------------------------------|-------------------|------------|------------|------------|---------------|------------|------------|------------|----------------|
| BC<br>(ng/m <sup>3</sup> )                   | MA200             | 270        | 359        | 456        | 571           | 666        | 878        | 1,494      | 5.5            |
| CO <sub>2</sub><br>(ppm)                     | SenseAir          | 417        | 421        | 427        | 431           | 435        | 441        | 455        | 1.1            |
| NO <sub>2</sub><br>(ppb)                     | CAPS              | 3.8        | 5.9        | 7.4        | 8.7           | 10         | 14         | 22         | 5.7            |
| PM <sub>2.5</sub><br>(ug/m <sup>3</sup> )    | M903              | 3.4        | 3.8        | 4.4        | 4.7           | 5.2        | 5.8        | 7.2        | 2.1            |
| UFP<br>(pt/cm <sup>3</sup> )<br>10-420<br>nm | NanoScan          | 5,613      | 6,791      | 8,691      | 10,110        | 11,663     | 17,434     | 29,530     | 5.3            |
| UFP<br>(pt/cm <sup>3</sup> )<br>10-700<br>nm | DiSCmini          | 4,872      | 5,813      | 7,348      | 8,711         | 10,540     | 18,902     | 41,403     | 8.5            |

|                               |         |       |       |       |       |       |        |        |     |
|-------------------------------|---------|-------|-------|-------|-------|-------|--------|--------|-----|
| UFP                           | P-TRAK  | 3,998 | 4,734 | 5,843 | 6,866 | 8,197 | 12,993 | 24,205 | 6.1 |
| ( $\mu\text{t}/\text{cm}^3$ ) |         |       |       |       |       |       |        |        |     |
| 20-1,000                      |         |       |       |       |       |       |        |        |     |
| nm                            |         |       |       |       |       |       |        |        |     |
| UFP                           | P-TRAK, | 1,844 | 2,126 | 2,656 | 3,149 | 3,641 | 4,913  | 9,125  | 4.9 |
| ( $\mu\text{t}/\text{cm}^3$ ) | Screen  |       |       |       |       |       |        |        |     |
| 36-1,000                      |         |       |       |       |       |       |        |        |     |
| nm                            |         |       |       |       |       |       |        |        |     |

---

295

296 Pearson correlation coefficients for annual average concentrations across pollutants at the  
297 309 monitoring sites ranged from as low as 0.27, indicating poor linear association, to 0.95,  
298 indicating very high linear association (SI Figure S15).  $\text{PM}_{2.5}$  and  $\text{CO}_2$  were generally poorly  
299 correlated with most other pollutants; BC and  $\text{NO}_2$  had moderate correlations with other  
300 pollutants; while individual UFP measures were strongly correlated with other UFP measures,  
301 moderately correlated with BC and  $\text{NO}_2$ , and poorly correlated with  $\text{PM}_{2.5}$  and  $\text{CO}_2$ .

302 The highest levels of overall air pollution (sum of the scores) were generally between  
303 north Seattle and the Seattle-Tacoma (Sea-Tac) International Airport, while the lowest levels  
304 were generally in the northeast (e.g., Woodinville, Bellevue) and southwest (West Seattle to  
305 Federal Way coastline) parts of the monitoring region (Figure 3 - Figure 4, SI Figure S16). Sites  
306 with high overall air pollution levels near downtown Seattle were generally driven by elevated  
307 BC and  $\text{NO}_2$  levels, while high concentration sites between Seattle and the Sea-Tac International  
308 Airport were generally driven by UFPs (SI Figure S17).

309

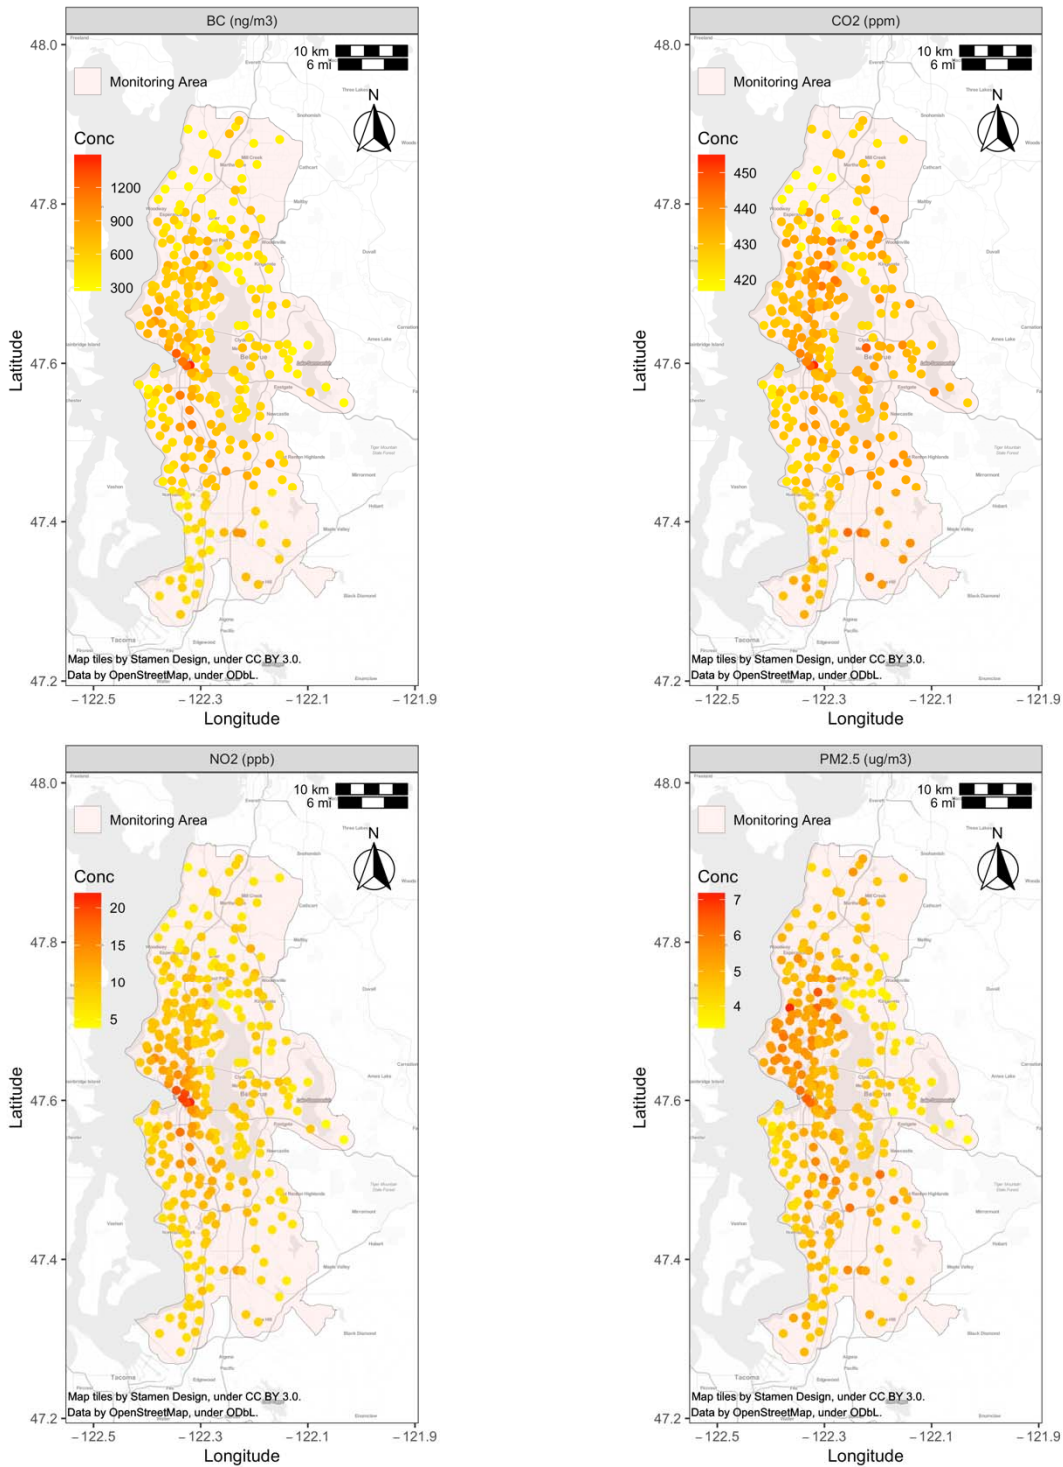

310

311 *Figure 3. Annual average PM<sub>2.5</sub>, BC, NO<sub>2</sub> and CO<sub>2</sub> concentrations at monitoring sites (N=309).*

312

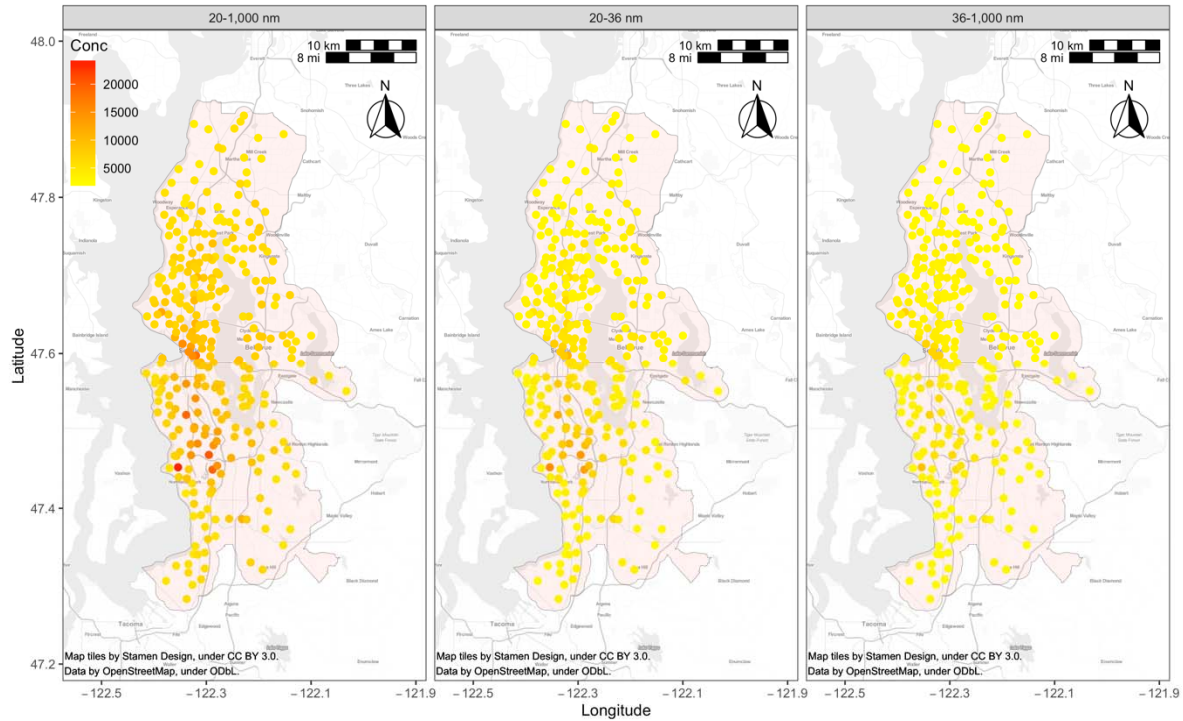

313

314 *Figure 4. Annual average UFP concentrations (total and by bin size in nm) at monitoring sites (N=309), as reported by P-TRAK*  
315 *instruments.*

316

317 Lasso regression models indicated that the covariate most strongly associated with UFPs

318 was proximity to the Sea-Tac International Airport, followed by proximity to major roadways

319 (see SI Figure S18). BC was most strongly associated with rail yard proximity; while  $PM_{2.5}$  was

320 associated with major road, airports and coastline proximity.  $NO_2$  was most associated with

321 proximity to rail yards, large ports and coastlines. Finally,  $CO_2$  was most strongly associated

322 with proximity to rail yards, medium ports, and major roadways.

323

### 324 3.4 Collocations at Regulatory Monitoring Sites

325

326 Median two-minute BC, NO<sub>2</sub> and PM<sub>2.5</sub> measurements from mobile monitoring stops  
327 were generally in agreement with measurements from regulatory sites (SI Figure S19). Annual  
328 average estimates from our mobile monitoring campaign measurements were similar to annual  
329 average estimates from comparable two-minute samples at regulatory monitoring sites used as  
330 collocations (SI Figure S20). These were in moderate agreement with true annual average  
331 concentrations at those sites (based on all of the available data during the study period).

332

## 333 4 Discussion

334

335 In this paper, we describe the design of an innovative mobile monitoring campaign  
336 specifically developed to estimate unbiased, highly spatially resolved, long-term TRAP  
337 exposures in an epidemiologic cohort. To date, this is one of the most extensive multi-pollutant  
338 mobile monitoring campaigns conducted in terms of spatial coverage (~1,200 land km<sup>2</sup>),  
339 sampling density (309 monitoring locations along 9 routes, or 1 monitor every 3.9 land km<sup>2</sup>), and  
340 sampling frequency (7 days a week; 288 days over a one-year period) and duration (~5 driving  
341 hours per day between the hours of 4 AM – 11 PM). The spatial resolution achieved by this  
342 campaign was significantly greater than would be expected from fixed regulatory monitoring  
343 approaches. We had one monitor per 3.9 km<sup>2</sup> of land area rather than 183 km<sup>2</sup> (6 regulatory sites  
344 in the monitoring area), almost a 50-fold increase. The average (SD) monitoring distance from an  
345 ACT cohort location was 611 (397) m rather than 5,805 (2,805) m, almost a ten-fold difference.  
346 Monitor proximity to prediction (i.e., cohort) locations is an important determinant of accurate

347 exposure assessment. Additionally, we previously showed that the extensive temporal sampling  
348 of this campaign across hours, days of the week and seasons is expected to produce more  
349 accurate and unbiased annual average estimates as compared to more common campaigns with  
350 reduced sampling.<sup>27</sup>

351 A unique aspect of this campaign was the collection of stationary samples along the side  
352 of the road. While most other campaigns have only collected non-stationary, on-road samples,  
353 various studies have shown that mobile samples are generally higher in concentration than  
354 stationary samples.<sup>19,35–38</sup> The completion of our stationary and non-stationary campaign  
355 positions us to conduct future work on how non-stationary data may be used responsibly for  
356 epidemiologic applications. Among the relatively few campaigns that have collected stationary  
357 rather than mobile samples alone, most have sampled for longer than two minutes (about 15-60  
358 minutes per stop).<sup>39</sup> Our analyses indicated that shorter sampling periods produce comparably  
359 good estimates without adding excessive amounts of time to mobile monitoring campaigns (See  
360 SI Figure S2). Our use of a hybrid vehicle meant that the vehicle's engine was off and running  
361 off battery during stop sampling periods, thus reducing the possibility of self-contamination.

362 ANOVA model results indicate differences across pollutants in terms of their spatial and  
363 temporal variability. This finding is particularly relevant for short-term mobile monitoring  
364 campaigns, which could design their campaigns to adequately capture the variability of the  
365 pollutants of interest. These findings suggest that repeated sampling at any given site is crucial  
366 since most of the variability for all measured pollutants was seen within sites. We observed a  
367 spatial variability for UFPs that was similar to that of NO<sub>2</sub> but higher than more commonly  
368 measured pollutants including BC, CO<sub>2</sub> and PM<sub>2.5</sub>. UFPs also had less temporal variability than  
369 all other measured pollutants. These findings suggest that UFP monitoring may benefit from

370 higher than normal spatial coverage even if the temporal coverage is reduced as a result. The  
371 implementation of these principles for epidemiologic exposure assessment should translate to  
372 reduced exposure misclassification. Overall, these results are in line with past literature that has  
373 shown differing spatial and temporal contrasts across pollutants,<sup>40,41</sup> though our work increases  
374 the robustness of these findings using a more spatially resolved, multi-pollutant dataset that  
375 includes less commonly measured UFPs.

376 The findings from this campaign demonstrate the region's generally low air pollution  
377 levels. The range of concentrations across sites for PM<sub>2.5</sub> (3.4-7.2 µg/m<sup>3</sup>) and NO<sub>2</sub> (3.8-22 ppb)  
378 were well below the National Ambient Air Quality Standards (NAAQS) annual average levels of  
379 15 µg/m<sup>3</sup> and 53 ppb, respectively.<sup>42</sup> Median UFP (~3,000-10,000 pt/cm<sup>3</sup>) and BC (~600 ng/m<sup>3</sup>)  
380 site concentrations were lower than what others have reported in cities throughout the world  
381 where mean study values range from roughly 6,000-64,000 UFP pt/cm<sup>3</sup> and 400-14,000 BC  
382 ng/m<sup>3</sup> (UFP<sup>19,36,37,43-57</sup>; BC<sup>17,19,37,46,47,52,57-69</sup>). While CO<sub>2</sub> site concentrations (417-455 ppm) were  
383 above the 2019 global average of 412 ppb,<sup>70</sup> they were in line with past work noting elevated  
384 carbon footprint levels in dense, high-income cities and affluent suburbs.<sup>71,72</sup> Still, the high  
385 concentration variability seen across sites for pollutants like UFP, BC and NO<sub>2</sub> (Table 1) suggest  
386 that future epidemiological analyses may have more power to observe health effects from these  
387 pollutants than those that are less variable, for example PM<sub>2.5</sub> and CO<sub>2</sub>.

388 The similarity between BC, NO<sub>2</sub> and PM<sub>2.5</sub> measurements from our campaign and  
389 collocated regulatory monitoring sites (see SI Figure S19-S20) confirms that our campaign  
390 estimates were accurate. Some of the discrepancies between the two monitoring approaches may  
391 be due to differences in the sampling instrumentation, the exact sampling location, and quality  
392 assurance and quality control procedures. While we were unable to compare CO<sub>2</sub> or UFP

393 measurements to regulatory observations, duplicate instrument collocations generally showed  
394 good agreement. Additionally, CO<sub>2</sub> instruments were regularly calibrated, and different UFP  
395 instruments were well correlated with each other.

396 As expected, we observed elevated annual average pollutant levels near aircraft, railroad,  
397 marine, and automobile sources. These findings are in line with past work.<sup>17–19,23,48,55,73–78</sup>  
398 Interestingly, major roadway covariates were associated with all of the pollutants, but they were  
399 not the most significant predictor for any of the pollutants. This observed correlation in the data  
400 is likely because larger roadways have greater vehicle volumes and greater numbers of high  
401 emitter vehicles (e.g., medium and heavy-duty diesel trucks) compared to smaller roadways.  
402 Still, these results highlight the critical role that non-automobile source emissions play on the  
403 region’s air pollution levels. Discrepancies in the covariates most strongly associated with each  
404 pollutant (e.g., airport vs. rail yard proximity) reflect important regional sources and unique  
405 spatial patterns of these pollutants. UFPs, for example, were distinguished from other pollutants  
406 in that levels were strikingly elevated near the Sea-Tac International Airport. While other  
407 pollutants like BC, NO<sub>2</sub> and CO<sub>2</sub> all had elevated levels near rail yards, they each had additional  
408 geographic covariates that further characterized their spatial patterns. These findings reinforce  
409 the uniqueness of each pollutant and the importance of monitoring for each. This is particularly  
410 true for UFPs given the limited monitoring data available and their unique spatial and temporal  
411 patterns.

412 While UFPs are generally characterized as particles under 100 nm in diameter, this  
413 definition is not standardly defined and varies from study to study. In fact, much of the existing  
414 and accessible instrumentation does not efficiently measure particles below 10-20 nm, and it  
415 often includes particles above 100 nm. This concern was echoed by the EPA’s 2019 Integrated



416 Science Assessment for Particulate Matter, where they noted the different size cuts used to  
417 define UFPs as an important limitation in their ability to synthesize findings from the literature.<sup>79</sup>  
418 Since most particles by count are in the smaller size range with few above 100 nm, instruments  
419 that effectively measure smaller particles sizes measure total UFP counts more accurately. In our  
420 data, for example, instruments that measured particles as small as 10 nm in diameter (i.e., the  
421 NanoScan and DiSCmini) showed sharp spikes in UFP concentrations near the airport and  
422 downtown Seattle. Note that differences in UFP readings between the NanoScan and DiSCmini  
423 is likely related to the NanoScan being an optical and condensation particle counter (CPC)  
424 whereas the DiSCmini is an electrical mobility analyzer. CPCs can detect very small particles  
425 more efficiently than mobility analyzers.<sup>80</sup> UFP measures from P-TRAKS, on the other hand,  
426 excluded particles smaller than 20 nm in diameter and reported attenuated spike concentrations.  
427 In fact, P-TRAK readings were generally lower than those from NanoScan and DiSCmini  
428 instruments, despite having a much higher upper size bound (420 and 700 nm vs 1,000 nm)  
429 because they missed a large number of small particles with diameters between 10-20 nm.  
430 Nonetheless, UFP measures from different instruments were strongly correlated with each other.  
431 This strengthens our confidence in the quality of our measurements and suggests that the use of  
432 different UFP instrumentation across studies could still produce useful exposure assessments.

433         Furthermore, the characterization of size-resolved UFP counts from multiple instruments  
434 is unique. We observed, for example, elevated levels of relatively smaller UFPs (approximately  
435 20-36 nm) almost exclusively near the airport. Past work has similarly linked elevated levels of  
436 these smaller UFPs, which contribute greatly to total UFP concentrations, to airport activity.<sup>74,81</sup>  
437 We are well-positioned to further explore UFP sources as well as size-specific exposure effects  
438 on epidemiological outcomes in future work.

439           Notably, other than different UFP measures, most pollutants were moderately or weakly  
440 correlated with one another. PM<sub>2.5</sub> and CO<sub>2</sub>, in particular, were poorly correlated with other  
441 measures of more spatially variable, traffic-related air pollutants including BC, UFPs and NO<sub>2</sub>.  
442 Though UFPs were more strongly correlated with NO<sub>2</sub> and BC than with PM<sub>2.5</sub> levels, there were  
443 some deviations, for example, near the airport. These results highlight the importance of  
444 collecting long-term measurements of traffic-related air pollutants using exposure assessment  
445 designs with higher spatial resolutions than the designs typically used for more common  
446 pollutants, such as studies that rely on PM<sub>2.5</sub> from regulatory monitoring sites. This may be  
447 particularly relevant for urban or other areas characterized by major emission sources such as  
448 airports or railroad systems, which may be important contributors to local and/or regional air  
449 pollution levels within an airshed. The differential spatial variability between these pollutants  
450 reinforces our interest in multi-pollutant exposure assessment. This is growing interest in the  
451 field of air pollution epidemiology,<sup>40,82–85</sup> and something that we are positioned to make a  
452 meaningful contribution to in future work.

453           A feature of mobile monitoring campaigns is their reliance on repeated, short-term  
454 samples in order to achieve increased spatial coverage when compared to traditional long-term  
455 monitoring approaches. Since we collected about 29 two-minute samples per site (about an hour  
456 of data), we recognize that the resulting annual average site estimates are noisy. ANOVA  
457 models, for example, showed that most of the variability observed in the two-minute  
458 measurements occurred within sites rather than across sites or over time. Still, our work suggests  
459 that our annual average estimates should be within a 20-30% error on average (See SI Figure  
460 S2). Furthermore, mobile monitoring campaigns may benefit from calculating weighted annual  
461 averages (e.g., weights for weekday samples = 5/7, weekend samples = 2/7) given the generally

462 small number of visits achieved per site, and since sampling may not be completely balanced  
463 despite efforts to do so.

464 Future mobile monitoring campaigns aiming to assess long-term estimates may be guided  
465 by the design and findings from this study, though we acknowledge that the unique geographical,  
466 meteorological and source characteristics of a given airshed may produce somewhat different  
467 results.

468 Finally, campaigns aiming to assess health outcomes with exposure periods of interest  
469 longer than a year should consider conducting longer or repeated campaigns to better  
470 characterize changing air pollution levels over time. Such monitoring, for example, may better  
471 capture natural disasters such as large wildfires, which are becoming increasingly important  
472 predictors of air quality during fire season.<sup>86-90</sup> These did not meaningfully impact regional air  
473 quality during this study's monitoring period, however.

474 The multi-pollutant approach of this campaign, which included multiple UFP measures,  
475 showed that the air pollution mixture varies throughout the region, with different pollutants  
476 dominating air pollution levels in different areas. While automobiles were important predictors  
477 of elevated air pollution levels, non-traffic sources such as the Sea-Tac International Airport and  
478 rail yards were also important sources in the region. UFP's relatively low concentration  
479 variability by season, hour of day, and day of week with higher relative variability within- and  
480 between- sites distinguishes this infrequently characterized pollutant from more commonly  
481 measured pollutants such as PM<sub>2.5</sub> or BC. Furthermore, while UFP readings from multiple  
482 instruments were well correlated, the variability in average levels across instruments suggests  
483 that a standardized UFP measurement approach would improve the consistency across studies.

484 For example, a standardized measurement approach would benefit from the inclusion of particle  
485 sizes below 20 nm given their meaningful contribution to particle counts.

486 These results demonstrates that the design of this campaign captured spatial and temporal  
487 pollutant variations that can be explained by sensible land use features, including those related to  
488 traffic, along with seasonal and diurnal effects. These data will thereby be useful for assessing  
489 representative TRAP exposures in the ACT cohort. Next steps for this work include developing  
490 exposure prediction models with these data for the cohort and greater Seattle area. The rich  
491 dataset from this extensive campaign will additionally allow us to investigate the role of study  
492 design in terms of spatial and temporal coverage (e.g., number of sites, number of site visits) on  
493 exposure prediction models and subsequent epidemiologic studies.

494

## 495 5 Acknowledgements

496

497 We are grateful to our two drivers, Jim Sullivan and Dave Hardie, for all of their efforts  
498 collecting these data, and to Brian High for building and supporting the database.

499 This work was funded by the Adult Changes in Thought – Air Pollution (ACT-AP) Study  
500 (National Institute of Environmental Health Sciences [NIEHS], National Institute on Aging  
501 [NIA], R01ES026187), BEBTEH: Biostatistics, Epidemiologic & Bioinformatic Training in  
502 Environmental Health (NIEHS, T32ES015459), and the University of Washington  
503 Interdisciplinary Center for Exposure, Disease, Genomics & Environment (NIEHS, 2P30  
504 ES007033-26). Research described in this article was conducted in part under contract to the  
505 Health Effects Institute (HEI), an organization jointly funded by the United States Environmental

506 Protection Agency (EPA) (Assistance Award No. CR-83998101) and certain motor vehicle and  
507 engine manufacturers. The contents of this article do not necessarily reflect the views of HEI, or  
508 its sponsors, nor do they necessarily reflect the views and policies of the EPA or motor vehicle  
509 and engine manufacturers.

## 510 6 References

- 511
- 512 1. Brunekreef B, Holgate ST. Air pollution and health. *The Lancet*. Published online 2002.  
513 doi:10.1016/S0140-6736(02)11274-8
- 514 2. Allen JL, Klocke C, Morris-Schaffer K, Conrad K, Sobolewski M, Cory-Slechta DA. *Cognitive*  
515 *Effects of Air Pollution Exposures and Potential Mechanistic Underpinnings.*; 2017.  
516 doi:10.1007/s40572-017-0134-3
- 517 3. Kilian J, Kitazawa M. The emerging risk of exposure to air pollution on cognitive decline and  
518 Alzheimer's disease - Evidence from epidemiological and animal studies. *Biomed J*.  
519 2018;41(3):141-162. doi:10.1016/j.bj.2018.06.001
- 520 4. Power MC, Adar SD, Yanosky JD, Weuve J. Exposure to air pollution as a potential contributor  
521 to cognitive function, cognitive decline, brain imaging, and dementia: A systematic  
522 review of epidemiologic research. *NeuroToxicology*. 2016;56:235-253.  
523 doi:10.1016/j.neuro.2016.06.004
- 524 5. Karner AA, Eisinger DS, Niemeier DA. Near-roadway air quality: Synthesizing the findings  
525 from real-world data. *Environ Sci Technol*. 2010;44(14):5334-5344.  
526 doi:10.1021/es100008x
- 527 6. Seaton A, Godden D, MacNee W, Donaldson K. Particulate air pollution and acute health  
528 effects. *The Lancet*. 1995;345(8943):176-178. doi:10.1016/S0140-6736(95)90173-6
- 529 7. Lundborg M, Johard U, Låstbom L, Gerde P, Camner P. Human Alveolar Macrophage  
530 Phagocytic Function is Impaired by Aggregates of Ultrafine Carbon Particles. *Environ Res*.  
531 2001;86(3):244-253. doi:10.1006/enrs.2001.4269
- 532 8. Oberdorster G, Ferin J, Lehnert BE. Correlation between particle size, in vivo particle  
533 persistence, and lung injury. In: *Environmental Health Perspectives.* ; 1994.
- 534 9. Stone V, Tuinman M, Vamvakopoulos JE, et al. Increased calcium influx in a monocytic cell  
535 line on exposure to ultrafine carbon black. *Eur Respir J*. 2000;15(2):297-303.
- 536 10. Li N, Sioutas C, Cho A, et al. Ultrafine particulate pollutants induce oxidative stress and  
537 mitochondrial damage. *Environ Health Perspect*. 2003;111(4):455-460.  
538 doi:10.1289/ehp.6000
- 539 11. Donaldson K. Ultrafine particles. *Occup Environ Med*. 2001;58(3):211-216.  
540 doi:10.1136/oem.58.3.211

- 541 12. Brown DM, Wilson MR, MacNee W, Stone V, Donaldson K. Size-dependent  
542 proinflammatory effects of ultrafine polystyrene particles: A role for surface area and  
543 oxidative stress in the enhanced activity of ultrafines. *Toxicol Appl Pharmacol.*  
544 2001;175(3):191-199. doi:10.1006/taap.2001.9240
- 545 13. US EPA. Overview of the Clean Air Act and Air Pollution. *U S Environ Prot Agency US EPA.*  
546 Published online 2020. <https://www.epa.gov/clean-air-act-overview>
- 547 14. Li HZ, Gu P, Ye Q, et al. Spatially dense air pollutant sampling: Implications of spatial  
548 variability on the representativeness of stationary air pollutant monitors. *Atmospheric*  
549 *Environ X.* 2019;2:100012. doi:<https://doi.org/10.1016/j.aeaoa.2019.100012>
- 550 15. US Census. TIGER/Line Shapefile, 2017, 2010 nation, U.S., 2010 Census Urban Area  
551 National. Published online 2021. Accessed April 29, 2021.  
552 [https://catalog.data.gov/dataset/tiger-line-shapefile-2017-2010-nation-u-s-2010-census-](https://catalog.data.gov/dataset/tiger-line-shapefile-2017-2010-nation-u-s-2010-census-urban-area-national)  
553 [urban-area-national](https://catalog.data.gov/dataset/tiger-line-shapefile-2017-2010-nation-u-s-2010-census-urban-area-national)
- 554 16. US EPA. *AirData Pre-Generated Data Files.*; 2019. Accessed December 7, 2019.  
555 [https://aqs.epa.gov/aqsweb/airdata/download\\_files.html](https://aqs.epa.gov/aqsweb/airdata/download_files.html)
- 556 17. Apte JS, Messier KP, Gani S, et al. High-Resolution Air Pollution Mapping with Google  
557 Street View Cars: Exploiting Big Data. *Environ Sci Technol.* 2017;51(12):6999-7008.  
558 doi:10.1021/acs.est.7b00891
- 559 18. Hatzopoulou M, Valois MF, Levy I, et al. Robustness of Land-Use Regression Models  
560 Developed from Mobile Air Pollutant Measurements. *Environ Sci Technol.*  
561 2017;51(7):3938-3947. doi:10.1021/acs.est.7b00366
- 562 19. Kerckhoffs J, Hoek G, Messier KP, et al. Comparison of ultrafine particle and black carbon  
563 concentration predictions from a mobile and short-term stationary land-use regression  
564 model. *Environ Sci Technol.* 2016;50(23):12894-12902. doi:10.1021/acs.est.6b03476
- 565 20. Patton AP, Perkins J, Zamore W, Levy JI, Brugge D, Durant JL. Spatial and temporal  
566 differences in traffic-related air pollution in three urban neighborhoods near an  
567 interstate highway. *Atmos Environ.* Published online 2014.  
568 doi:10.1016/j.atmosenv.2014.09.072
- 569 21. Van den Bossche J, Peters J, Verwaeren J, Botteldooren D, Theunis J, De Baets B. Mobile  
570 monitoring for mapping spatial variation in urban air quality: Development and validation  
571 of a methodology based on an extensive dataset. *Atmos Environ.* Published online 2015.  
572 doi:10.1016/j.atmosenv.2015.01.017
- 573 22. Whitby KT, Clark WE, Marple VA, et al. Characterization of California aerosols—I. Size  
574 distributions of freeway aerosol. *Atmospheric Environ 1967.* 1975;9(5):463-482.  
575 doi:10.1016/0004-6981(75)90107-9

- 576 23. Xie X, Semanjski I, Gautama S, et al. A Review of Urban Air Pollution Monitoring and  
577 Exposure Assessment Methods. *ISPRS Int J Geo-Inf.* 2017;6(12). doi:10.3390/ijgi6120389
- 578 24. Klompaker JO, Montagne DR, Meliefste K, Hoek G, Brunekreef B. Spatial variation of  
579 ultrafine particles and black carbon in two cities: Results from a short-term measurement  
580 campaign. *Sci Total Environ.* 2015;508:266-275. doi:10.1016/j.scitotenv.2014.11.088
- 581 25. Montagne DR, Hoek G, Klompaker JO, Wang M, Meliefste K, Brunekreef B. Land Use  
582 Regression Models for Ultrafine Particles and Black Carbon Based on Short-Term  
583 Monitoring Predict Past Spatial Variation. *Environ Sci Technol.* 2015;49(14):8712-8720.  
584 doi:10.1021/es505791g
- 585 26. Riley EA, Banks L, Fintzi J, et al. Multi-pollutant mobile platform measurements of air  
586 pollutants adjacent to a major roadway. *Atmos Environ.* 2014;98:492-499.  
587 doi:10.1016/j.atmosenv.2014.09.018
- 588 27. Blanco MN, Doubleday A, Austin E, et al. Design and evaluation of mobile monitoring  
589 campaigns for air pollution exposure assessment in epidemiologic cohorts. *medRxiv.*  
590 Published online January 1, 2021:2021.04.21.21255641.  
591 doi:10.1101/2021.04.21.21255641
- 592 28. Alexeeff SE, Roy A, Shan J, et al. High-resolution mapping of traffic related air pollution  
593 with Google street view cars and incidence of cardiovascular events within  
594 neighborhoods in Oakland, CA. *Environ Health.* 2018;17(38):1-13.
- 595 29. Kukull WA, Higdon R, Bowen JD, et al. Dementia and Alzheimer disease incidence: A  
596 prospective cohort study. *Arch Neurol.* 2002;59(11):1737-1746.  
597 doi:10.1001/archneur.59.11.1737
- 598 30. Esri. *ArcGIS Desktop.* Esri; 2019.  
599 [https://www.esri.com/about/newsroom/overview/?rmedium=NewsFallback&rsource=bl](https://www.esri.com/about/newsroom/overview/?rmedium=NewsFallback&rsource=blogs.esri.com/Support/blogs/mappingcenter/archive/2010/12/03/using-and-citing-esri-data.aspx)  
600 [ogs.esri.com/Support/blogs/mappingcenter/archive/2010/12/03/using-and-citing-esri-](https://www.esri.com/about/newsroom/overview/?rmedium=NewsFallback&rsource=blogs.esri.com/Support/blogs/mappingcenter/archive/2010/12/03/using-and-citing-esri-data.aspx)  
601 [data.aspx](https://www.esri.com/about/newsroom/overview/?rmedium=NewsFallback&rsource=blogs.esri.com/Support/blogs/mappingcenter/archive/2010/12/03/using-and-citing-esri-data.aspx)
- 602 31. Szpiro AA, Paciorek CJ. Measurement error in two-stage analyses, with application to air  
603 pollution epidemiology. *Environmetrics.* Published online 2013. doi:10.1002/env.2233
- 604 32. Google. *Google Maps.* Google Inc.; 2019. <https://www.maps.google.com>
- 605 33. PSCAA. *Air Quality Data. Puget Sound Clean Air Agency (PSCAA).*; 2020. Accessed April 6,  
606 2020. <https://pscleanair.gov/154/Air-Quality-Data>
- 607 34. Keller JP, Olives C, Kim SY, et al. A unified spatiotemporal modeling approach for  
608 predicting concentrations of multiple air pollutants in the multi-ethnic study of  
609 atherosclerosis and air pollution. *Environ Health Perspect.* 2015;123(4):301-309.  
610 doi:10.1289/ehp.1408145



- 611 35. Kerckhoffs J, Hoek G, Portengen L, Brunekreef B, Vermeulen RCH. Performance of  
612 Prediction Algorithms for Modeling Outdoor Air Pollution Spatial Surfaces. *Environ Sci*  
613 *Technol.* 2019;53(3):1413-1421. doi:10.1021/acs.est.8b06038
- 614 36. Kerckhoffs J, Hoek G, Gehring U, Vermeulen R. Modelling nationwide spatial variation of  
615 ultrafine particles based on mobile monitoring. *Environ Int.* 2021;154:106569.  
616 doi:10.1016/j.envint.2021.106569
- 617 37. Minet L, Liu R, Valois MF, Xu J, Weichenthal S, Hatzopoulou M. Development and  
618 Comparison of Air Pollution Exposure Surfaces Derived from On-Road Mobile Monitoring  
619 and Short-Term Stationary Sidewalk Measurements. *Environ Sci Technol.*  
620 2018;52(6):3512-3519. doi:10.1021/acs.est.7b05059
- 621 38. Simon MC, Hudda N, Naumova EN, Levy JI, Brugge D, Durant JL. Comparisons of Traffic-  
622 Related Ultrafine Particle Number Concentrations Measured in Two Urban Areas by  
623 Central, Residential, and Mobile Monitoring. *Atmospheric Environ Oxf Engl 1994.*  
624 2017;169:113-127. doi:10.1016/j.atmosenv.2017.09.003
- 625 39. Saha PK, Li HZ, Apte JS, Robinson AL, Presto AA. Urban Ultrafine Particle Exposure  
626 Assessment with Land-Use Regression: Influence of Sampling Strategy. *Environ Sci*  
627 *Technol.* 2019;53:7326-7336. doi:10.1021/acs.est.9b02086
- 628 40. Levy I, Mihele C, Lu G, Narayan J, Brook JR. Evaluating multipollutant exposure and urban  
629 air quality: pollutant interrelationships, neighborhood variability, and nitrogen dioxide as  
630 a proxy pollutant. *Environ Health Perspect.* 2014;122(1):65-72.
- 631 41. Levy I, Mihele C, Lu G, Narayan J, Hilker N, Brook JR. Elucidating multipollutant exposure  
632 across a complex metropolitan area by systematic deployment of a mobile laboratory.  
633 *Atmospheric Chem Phys.* Published online 2014. doi:10.5194/acp-14-7173-2014
- 634 42. US EPA. NAAQS Table. *U S Environ Prot Agency US EPA.* Published online February 10,  
635 2021. Accessed July 7, 2021. <https://www.epa.gov/criteria-air-pollutants/naaqs-table>
- 636 43. Abernethy RC, Allen RW, McKendry IG, Brauer M. A land use regression model for ultrafine  
637 particles in Vancouver, Canada. *Environ Sci Technol.* 2013;47(10):5217-5225.
- 638 44. Farrell W, Weichenthal S, Goldberg M, Valois M-F, Shekarrizfard M, Hatzopoulou M. Near  
639 roadway air pollution across a spatially extensive road and cycling network. *Environ*  
640 *Pollut.* 2016;212:498-507. doi:<https://doi.org/10.1016/j.envpol.2016.02.041>
- 641 45. Hankey S, Marshall JD. On-bicycle exposure to particulate air pollution: Particle number,  
642 black carbon, PM2.5, and particle size. *Atmos Environ.* 2015;122:65-73.  
643 doi:10.1016/j.atmosenv.2015.09.025

- 644 46. Kerckhoffs J, Hoek G, Vlaanderen J, et al. Robustness of intra urban land-use regression  
645 models for ultrafine particles and black carbon based on mobile monitoring. *Environ Res.*  
646 2017;159(May):500-508. doi:10.1016/j.envres.2017.08.040
- 647 47. Montagne DR, Hoek G, Klompaker JO, Wang M, Meliefste K, Brunekreef B. Land Use  
648 Regression Models for Ultrafine Particles and Black Carbon Based on Short-Term  
649 Monitoring Predict Past Spatial Variation. *Environ Sci Technol.* 2015;49(14):8712-8720.  
650 doi:10.1021/es505791g
- 651 48. Patton AP, Zamore W, Naumova EN, Levy JI, Brugge D, Durant JL. Transferability and  
652 generalizability of regression models of ultrafine particles in urban neighborhoods in the  
653 boston area. *Environ Sci Technol.* 2015;49(10):6051-6060. doi:10.1021/es5061676
- 654 49. Ragettli MS, Ducret-Stich RE, Foraster M, et al. Spatio-temporal variation of urban ultrafine  
655 particle number concentrations. *Atmos Environ.* 2014;96:275-283.  
656 doi:10.1016/j.atmosenv.2014.07.049
- 657 50. Rivera M, Basagaña X, Aguilera I, et al. Spatial distribution of ultrafine particles in urban  
658 settings: A land use regression model. *Atmos Environ.* 2012;54:657-666.  
659 doi:10.1016/j.atmosenv.2012.01.058
- 660 51. Saha PK, Zimmerman N, Malings C, et al. Quantifying high-resolution spatial variations and  
661 local source impacts of urban ultrafine particle concentrations. *Sci Total Environ.*  
662 2019;655:473-481. doi:https://doi.org/10.1016/j.scitotenv.2018.11.197
- 663 52. Saraswat A, Apte JS, Kandlikar M, Brauer M, Henderson SB, Marshall JD. Spatiotemporal  
664 land use regression models of fine, ultrafine, and black carbon particulate matter in New  
665 Delhi, India. *Environ Sci Technol.* 2013;47(22):12903-12911. doi:10.1021/es401489h
- 666 53. Simon MC, Patton AP, Naumova EN, et al. Combining Measurements from Mobile  
667 Monitoring and a Reference Site to Develop Models of Ambient Ultrafine Particle  
668 Number Concentration at Residences. *Environ Sci Technol.* 2018;52(12):6985-6995.  
669 doi:10.1021/acs.est.8b00292
- 670 54. van Nunen E, Vermeulen R, Tsai M-Y, et al. Land use regression models for ultrafine  
671 particles in six European areas. *Environ Sci Technol.* 2017;51(6):3336-3345.
- 672 55. Weichenthal S, Ryswyk K Van, Goldstein A, Bagg S, Shekarrizfard M, Hatzopoulou M. A  
673 land use regression model for ambient ultrafine particles in Montreal, Canada: A  
674 comparison of linear regression and a machine learning approach. *Environ Res.*  
675 2016;146:65-72. doi:10.1016/j.envres.2015.12.016
- 676 56. Weichenthal S, Van Ryswyk K, Goldstein A, Shekarrizfard M, Hatzopoulou M.  
677 Characterizing the spatial distribution of ambient ultrafine particles in Toronto, Canada: A  
678 land use regression model. *Environ Pollut.* Published online 2016.  
679 doi:10.1016/j.envpol.2015.04.011

- 680 57. Yu CH, Fan Z, Liou PJ, Baptista A, Greenberg M, Laumbach RJ. A novel mobile monitoring  
681 approach to characterize spatial and temporal variation in traffic-related air pollutants in  
682 an urban community. *Atmos Environ*. 2016;141:161-173.  
683 doi:10.1016/j.atmosenv.2016.06.044
- 684 58. Beelen R, Hoek G, Fischer P, van den Brandt PA, Brunekreef B. Estimated long-term  
685 outdoor air pollution concentrations in a cohort study. *Atmospheric Environ* 1994.  
686 2007;41(26):1343-1358.
- 687 59. Brauer M, Hoek G, Vliet P van, et al. Estimating Long-Term Average Particulate Air  
688 Pollution Concentrations: Application of Traffic Indicators and Geographic Information  
689 Systems. *Epidemiol Camb Mass*. 2003;14(2):228-239.  
690 doi:10.1097/01.EDE.0000041910.49046.9B
- 691 60. Carr D, von Ehrenstein O, Weiland S, et al. Modeling annual benzene, toluene, NO<sub>2</sub>, and  
692 soot concentrations on the basis of road traffic characteristics. *Environ Res*.  
693 2002;90(2):111-118. doi:10.1006/enrs.2002.4393
- 694 61. Dodson RE, Houseman EA, Morin B, Levy JI. An analysis of continuous black carbon  
695 concentrations in proximity to an airport and major roadways. *Atmos Environ*.  
696 2009;43(24):3764-3773.
- 697 62. Hankey S, Marshall JD. Land Use Regression Models of On-Road Particulate Air Pollution  
698 (Particle Number, Black Carbon, PM<sub>2.5</sub>, Particle Size) Using Mobile Monitoring. *Environ*  
699 *Sci Technol*. 2015;49(15):9194-9202. doi:10.1021/acs.est.5b01209
- 700 63. Henderson SB, Beckerman B, Jerrett M, Brauer M. Application of Land Use Regression to  
701 Estimate Long-Term Concentrations of Traffic-Related Nitrogen Oxides and Fine  
702 Particulate Matter. *Environ Sci Technol*. 2007;41(7):2422-2428. doi:10.1021/es0606780
- 703 64. Hochadel M, Heinrich J, Gehring U, et al. Predicting long-term average concentrations of  
704 traffic-related air pollutants using GIS-based information. *Atmospheric Environ* 1994.  
705 2006;40(3):542-553. doi:10.1016/j.atmosenv.2005.09.067
- 706 65. Larson T, Su J, Baribeau A-M, Buzzelli M, Setton E, Brauer M. A spatial model of urban  
707 winter woodsmoke concentrations. *Environ Sci Technol*. 2007;41(7):2429-2436.
- 708 66. Larson T, Henderson SB, Brauer M. Mobile monitoring of particle light absorption  
709 coefficient in an urban area as a basis for land use regression. *Environ Sci Technol*.  
710 2009;43(13):4672-4678. doi:10.1021/es803068e
- 711 67. Morgenstern V, Zutavern A, Cyrus J, et al. Respiratory health and individual estimated  
712 exposure to traffic-related air pollutants in a cohort of young children. *Occup Environ*  
713 *Med*. 2007;64(1):8-16. doi:10.1136/oem.2006.028241

- 714 68. Ryan PH, LeMasters GK, Biswas P, et al. A Comparison of Proximity and Land Use  
715 Regression Traffic Exposure Models and Wheezing in Infants. *Environ Health Perspect.*  
716 2007;115(2):278-284. doi:10.1289/ehp.9480
- 717 69. Su JG, Allen G, Miller PJ, Brauer M. Spatial modeling of residential woodsmoke across a  
718 non-urban upstate New York region. *Air Qual Atmosphere Health.* 2013;6(1):85-94.  
719 doi:10.1007/s11869-011-0148-1
- 720 70. NOAA. NOAA Climate.gov. *Natl Ocean Atmospheric Adm NOAA.* Published online 2021.  
721 Accessed July 7, 2021. <https://www.climate.gov>
- 722 71. Moran D, Kanemoto K, Jiborn M, Wood R, Többen J, Seto KC. Carbon footprints of 130000  
723 cities. *Environ Res Lett.* 2018;13(6):064041. doi:10.1088/1748-9326/aac72a
- 724 72. Moran D, Kanemoto K, Wood R, Tobben J, Seto K. Global Gridded Model of Carbon  
725 Footprints (GGMCF). Published 2021. Accessed July 7, 2021.  
726 <http://citycarbonfootprints.info>
- 727 73. Abhijith K V, Kumar P, Gallagher J, et al. Air pollution abatement performances of green  
728 infrastructure in open road and built-up street canyon environments – A review. *Atmos*  
729 *Environ.* 2017;162:71-86. doi:<https://doi.org/10.1016/j.atmosenv.2017.05.014>
- 730 74. Austin E, Xiang J, Gould TR, et al. Distinct Ultrafine Particle Profiles Associated with Aircraft  
731 and Roadway Traffic. *Environ Sci Technol.* 2021;55(5):2847-2858.  
732 doi:10.1021/acs.est.0c05933
- 733 75. Hoek G, Beelen R, de Hoogh K, et al. A review of land-use regression models to assess  
734 spatial variation of outdoor air pollution. *Atmos Environ.* 2008;42(33):7561-7578.  
735 doi:10.1016/j.atmosenv.2008.05.057
- 736 76. Lane KJ, Levy JI, Scammell MK, et al. Association of modeled long-term personal exposure  
737 to ultrafine particles with inflammatory and coagulation biomarkers. *Environ Int.*  
738 2016;92-93:173-182. doi:<https://doi.org/10.1016/j.envint.2016.03.013>
- 739 77. Patton AP, Collins C, Naumova EN, Zamore W, Brugge D, Durant JL. An hourly regression  
740 model for ultrafine particles in a near-highway urban area. *Environ Sci Technol.*  
741 2014;48(6):3272-3280. doi:10.1021/es404838k
- 742 78. Saha PK, Li HZ, Apte JS, Robinson AL, Presto AA. Urban Ultrafine Particle Exposure  
743 Assessment with Land-Use Regression: Influence of Sampling Strategy. *Environ Sci*  
744 *Technol.* 2019;53:7326-7336. doi:10.1021/acs.est.9b02086
- 745 79. US EPA. Integrated science assessment (ISA) for particulate matter (final report, Dec 2019).  
746 *US Environ Prot Agency.* Published online 2019.  
747 <https://cfpub.epa.gov/ncea/isa/recordisplay.cfm?deid=347534>

- 748 80. Welker RW. Chapter 4 - Size Analysis and Identification of Particles. In: Kohli R, Mittal KL,  
749 eds. *Developments in Surface Contamination and Cleaning*. William Andrew Publishing;  
750 2012:179-213. doi:10.1016/B978-1-4377-7883-0.00004-3
- 751 81. Stacey B. Measurement of ultrafine particles at airports: A review. *Atmos Environ*.  
752 2019;198:463-477. doi:10.1016/j.atmosenv.2018.10.041
- 753 82. Billionnet C, Sherrill D, Annesi-Maesano I. Estimating the Health Effects of Exposure to  
754 Multi-Pollutant Mixture. *Ann Epidemiol*. 2012;22(2):126-141.  
755 doi:10.1016/j.annepidem.2011.11.004
- 756 83. Dominici F, Peng RD, Barr CD, Bell ML. Protecting human health from air pollution: shifting  
757 from a single-pollutant to a multipollutant approach. *Epidemiol Camb Mass*.  
758 2010;21(2):187-194. doi:10.1097/EDE.0b013e3181cc86e8
- 759 84. Oakes M, Baxter L, Long TC. Evaluating the application of multipollutant exposure metrics  
760 in air pollution health studies. *Environ Int*. 2014;69:90-99.  
761 doi:10.1016/j.envint.2014.03.030
- 762 85. Stafoggia M, Breitner S, Hampel R, Basagaña X. Statistical Approaches to Address Multi-  
763 Pollutant Mixtures and Multiple Exposures: the State of the Science. *Curr Environ Health*  
764 *Rep*. 2017;4(4):481-490. doi:10.1007/s40572-017-0162-z
- 765 86. Doubleday A, Schulte J, Sheppard L, et al. Mortality associated with wildfire smoke  
766 exposure in Washington state, 2006–2017: a case-crossover study. *Environ Health*.  
767 2020;19(1):4. doi:10.1186/s12940-020-0559-2
- 768 87. Landguth EL, Holden ZA, Graham J, et al. The delayed effect of wildfire season particulate  
769 matter on subsequent influenza season in a mountain west region of the USA. *Environ*  
770 *Int*. 2020;139:105668. doi:https://doi.org/10.1016/j.envint.2020.105668
- 771 88. Rappold AG, Reyes J, Pouliot G, Cascio WE, Diaz-Sanchez D. Community Vulnerability to  
772 Health Impacts of Wildland Fire Smoke Exposure. *Environ Sci Technol*. 2017;51(12):6674-  
773 6682. doi:10.1021/acs.est.6b06200
- 774 89. Reid Colleen E., Brauer Michael, Johnston Fay H., Jerrett Michael, Balmes John R., Elliott  
775 Catherine T. Critical Review of Health Impacts of Wildfire Smoke Exposure. *Environ*  
776 *Health Perspect*. 2016;124(9):1334-1343. doi:10.1289/ehp.1409277
- 777 90. Xiang J, Huang C-H, Shirai J, et al. Field measurements of PM2.5 infiltration factor and  
778 portable air cleaner effectiveness during wildfire episodes in US residences. *Sci Total*  
779 *Environ*. 2021;773:145642. doi:https://doi.org/10.1016/j.scitotenv.2021.145642
- 780
