1 **Characterization of annual average traffic-related air pollution levels (particle number,**  
2 **black carbon, nitrogen dioxide, PM<sub>2.5</sub>, carbon dioxide) in the greater Seattle area from a**  
3 **year-long mobile monitoring campaign**

4

5 Magali N. Blanco,<sup>a</sup> Amanda Gasset, <sup>a</sup> Timothy Gould,<sup>b</sup> Annie Doubleday,<sup>a</sup> David L. Slager,<sup>a</sup>

6 Elena Austin,<sup>a</sup> Edmund Seto,<sup>a</sup> Timothy Larson,<sup>a,b</sup> Julian Marshall,<sup>b</sup> Lianne Sheppard<sup>a,c</sup>

7

8

9 <sup>a</sup>Department of Environmental and Occupational Health Sciences, School of Public Health,  
10 University of Washington, Hans Rosling Center for Population Health, 3980 15th Ave NE,  
11 Seattle, WA 98195

12

13 <sup>b</sup>Department of Civil & Environmental Engineering, College of Engineering, University of  
14 Washington, 201 More Hall, Box 352700, Seattle, WA 98195

15

16 <sup>c</sup>Department of Biostatistics, School of Public Health, University of Washington, Hans Rosling  
17 Center for Population Health, 3980 15th Ave NE, Seattle, WA 98195

18

19  
20  
21  
22  
23  
24  
25  
26  
27  
28  
29  
30  
31  
32  
33  
34  
35  
36  
37  
38  
39  
40

## Abstract

Growing evidence links traffic-related air pollution (TRAP) to adverse health effects. We designed an innovative and extensive mobile monitoring campaign to characterize TRAP exposure levels for the Adult Changes in Thought (ACT) study, a Seattle-based cohort. The campaign measured particle number concentration (PNC) to capture ultrafine particles (UFP), black carbon (BC), nitrogen dioxide (NO<sub>2</sub>), fine particulate matter (PM<sub>2.5</sub>), and carbon dioxide (CO<sub>2</sub>) at 309 stop sites representative of the cohort. We collected about 29 two-minute visit measures at each site during all seasons, days of the week, and most times of day during a one-year period. Validation showed good agreement between our BC, NO<sub>2</sub>, and PM<sub>2.5</sub> measurements and regulatory monitoring sites ( $R^2 = 0.68-0.73$ ). Universal kriging–partial least squares models of annual average pollutant concentrations had cross-validated mean square error-based  $R^2$  (and root mean square error) values of 0.77 (1,177 pt/cm<sup>3</sup>) for PNC, 0.60 (102 ng/m<sup>3</sup>) for BC, 0.77 (1.3 ppb) for NO<sub>2</sub>, 0.70 (0.3 μg/m<sup>3</sup>) for PM<sub>2.5</sub>, and 0.50 (4.2 ppm) for CO<sub>2</sub>. Overall, we found that the design of this extensive campaign captured the spatial pollutant variations well and these were explained by sensible land use features, including those related to traffic.

Synopsis: We develop well-performing, long-term average pollutant exposure prediction models for epidemiologic application from an innovative and extensive short-term mobile monitoring campaign.

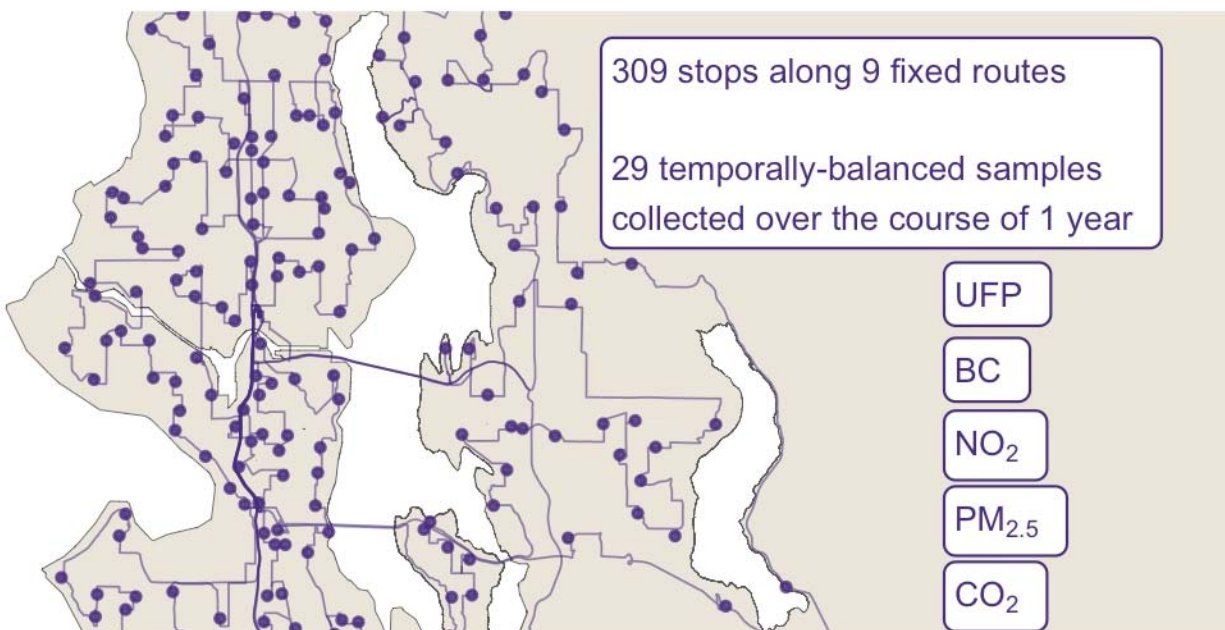

41

## 42 1 Introduction

43

44 An extensive body of evidence has linked air pollution to adverse health effects including  
45 respiratory, cardiovascular and mortality outcomes.<sup>1</sup> Recent evidence has begun to link traffic-  
46 related air pollution (TRAP) exposure to cognitive function among various populations,  
47 including the elderly.<sup>2-6</sup> While TRAP is a complex mixture that varies over time and space,  
48 pollutants include ultrafine particles (UFP; typically defined as aerodynamic diameter  $\leq 100$   
49 nm), black carbon (BC), oxides of nitrogen including nitrogen dioxide (NO<sub>2</sub>), carbon dioxide  
50 (CO<sub>2</sub>), and carbon monoxide (CO).<sup>7</sup> In particular, UFPs have increasingly been associated with  
51 important health outcomes including more neurotoxicity and systemic inflammation than larger  
52 particles.<sup>8-14</sup>

53 To date, however, much of the epidemiology air pollution research has been limited to  
54 the federally defined criteria air pollutants, monitored nationwide through the EPA's regulatory  
55 Air Quality System (AQS) monitoring network. This network has monitored criteria pollutant

56 levels throughout the US since the 1990s, and none specifically include UFPs.<sup>15</sup> Furthermore,  
57 this network is spatially sparse and thus fails to capture the spatial variability of more quickly  
58 decaying pollutants, including many TRAPs.<sup>16</sup> The Seattle Census Urbanized Area, for example,  
59 averages about 1 AQS monitor every 174 km<sup>2</sup> (~14 active monitors within a land area of about  
60 2,440 km<sup>2</sup>), most of which measure fine particulate matter mass concentration with diameter of  
61 less than 2.5 μm (PM<sub>2.5</sub>) and BC.<sup>17,18</sup>

62 Mobile monitoring campaigns for assessing air pollution exposure have been used since  
63 at least the 1970s and have become increasingly common in recent years in an effort to address  
64 the limitations of traditional fixed site monitoring approaches.<sup>19-25</sup> Typically, a vehicle is  
65 equipped with air monitors capable of measuring pollutants with high temporal resolution. Short-  
66 term sampling repeatedly occurs with this platform at predefined sites. Past work has shown that  
67 repeated short-term air pollution samples can be used to calculate unbiased long-term averages,  
68 thus reducing the need for continuous fixed-site monitoring.<sup>19,20</sup> Because the sampling duration  
69 at individual sites can be quite short, campaigns can increase their spatial coverage with a single  
70 platform, thus making this approach more time- and cost- efficient than traditional fixed-site  
71 monitoring.

72 Still, the designs of past mobile monitoring campaigns have arguably limited their  
73 epidemiologic application. Importantly, most campaigns have sampled during limited time  
74 periods, for example, weekday business hours during one to three seasons.<sup>21,26-28</sup> We previously  
75 showed that these limited sampling campaigns likely result in biased long-term human exposure  
76 estimates because they do not capture the high temporal variability of many TRAPs, and that the  
77 exact degree of bias varies (is not consistent) across site.<sup>29</sup> Additionally, many campaigns have  
78 sampled along non-residential areas such as highways and industrial areas where air pollution

79 levels may be much higher than the levels that most people are exposed to. Furthermore, most  
80 have collected non-stationary (mobile) on-road samples rather than stationary samples along the  
81 side of the road closer to participant residences. While non-stationary designs increase spatial  
82 coverage, further work is needed to demonstrate whether these are representative of residential  
83 human exposure levels.<sup>21,30</sup> The additional bias that likely results from these limited sampling  
84 schemes is unclear.

85 To address the limitations of past campaigns, we designed an extensive, multi-pollutant  
86 mobile monitoring campaign to characterize TRAP exposure levels for the Adult Changes in  
87 Thought (ACT) study cohort. ACT is a long-standing, prospective cohort study that has been  
88 investigating aging and brain health in the greater Seattle area since 1995.<sup>31</sup> The campaign  
89 measured TRAP at 309 stationary sites (stops) representative of the cohort in a temporally  
90 balanced approach throughout the course of a year. The goal of this paper is to describe the  
91 mobile monitoring design's sampling methodology and TRAP measures collected, and to  
92 develop exposure predictions for later application to the ACT cohort. To the best of our  
93 knowledge, this is one of the most extensive mobile monitoring campaigns conducted in terms of  
94 the pollutants measured, the spatial coverage and resolution, and the campaign duration and  
95 sampling frequency.

96

## 97 2 Methods

98

99 Briefly, multiple pollutants including particle number concentration (PNC), BC, NO<sub>2</sub>,  
100 PM<sub>2.5</sub>, and CO<sub>2</sub> were simultaneously measured with high quality instrumentation at 309 stop  
101 sites off the side of the road along fixed routes. Sites were representative of the cohort's large

102 spatial and geographical distribution throughout the greater Seattle area. A temporally balanced,  
103 year-long driving schedule that measured TRAP during all seasons, days of the week, and most  
104 times of the day enabled us to estimate unbiased annual average estimates at the site level.  
105 Details are described below.

106

## 107 2.1 Spatial Compatibility of the Selected Stop Sites and the ACT Cohort

108

109 We selected a mobile monitoring region in the greater Seattle, WA area that was roughly  
110 1,200 land km<sup>2</sup> (463 mi<sup>2</sup>; Figure 1). The monitoring region was composed of Census Tracts  
111 where the majority of the ACT cohort had historically resided between 1989-2018 (87% =  
112 10,330/11,904 locations). This large region fell in western King County and southwest  
113 Snohomish County, and it included a variety of urban and rural areas with various land uses  
114 including residential, industrial, commercial, and downtown areas. We used the Location-  
115 Allocation tool in ArcMap (ArcGIS v. 10.5.1)<sup>32</sup> to select 304 stops within the monitoring region  
116 that were representative of the ACT cohort (approximately one monitoring site per 33 participant  
117 locations; see Supplementary Information [SI] Note S1 for details). Stops were spatially  
118 distributed so that they would cover all parts of the monitoring region. The exact sites selected  
119 were meant to minimize the distance between the monitoring and cohort locations. Five  
120 additional stops were collocations at nearby regulatory air quality monitoring sites measuring  
121 pollutants similar to our platform (see below). In total, there were 309 stops. The average (SD)  
122 distance between a cohort location and the nearest monitoring stop was 611 (397) m. The  
123 monitoring stops and cohort locations had similar distributions of various TRAP-related

- 124 covariates (e.g., proximity to roadways, airport, railyard), indicating good spatial compatibility
- 125 (SI Figure S1).<sup>33</sup>

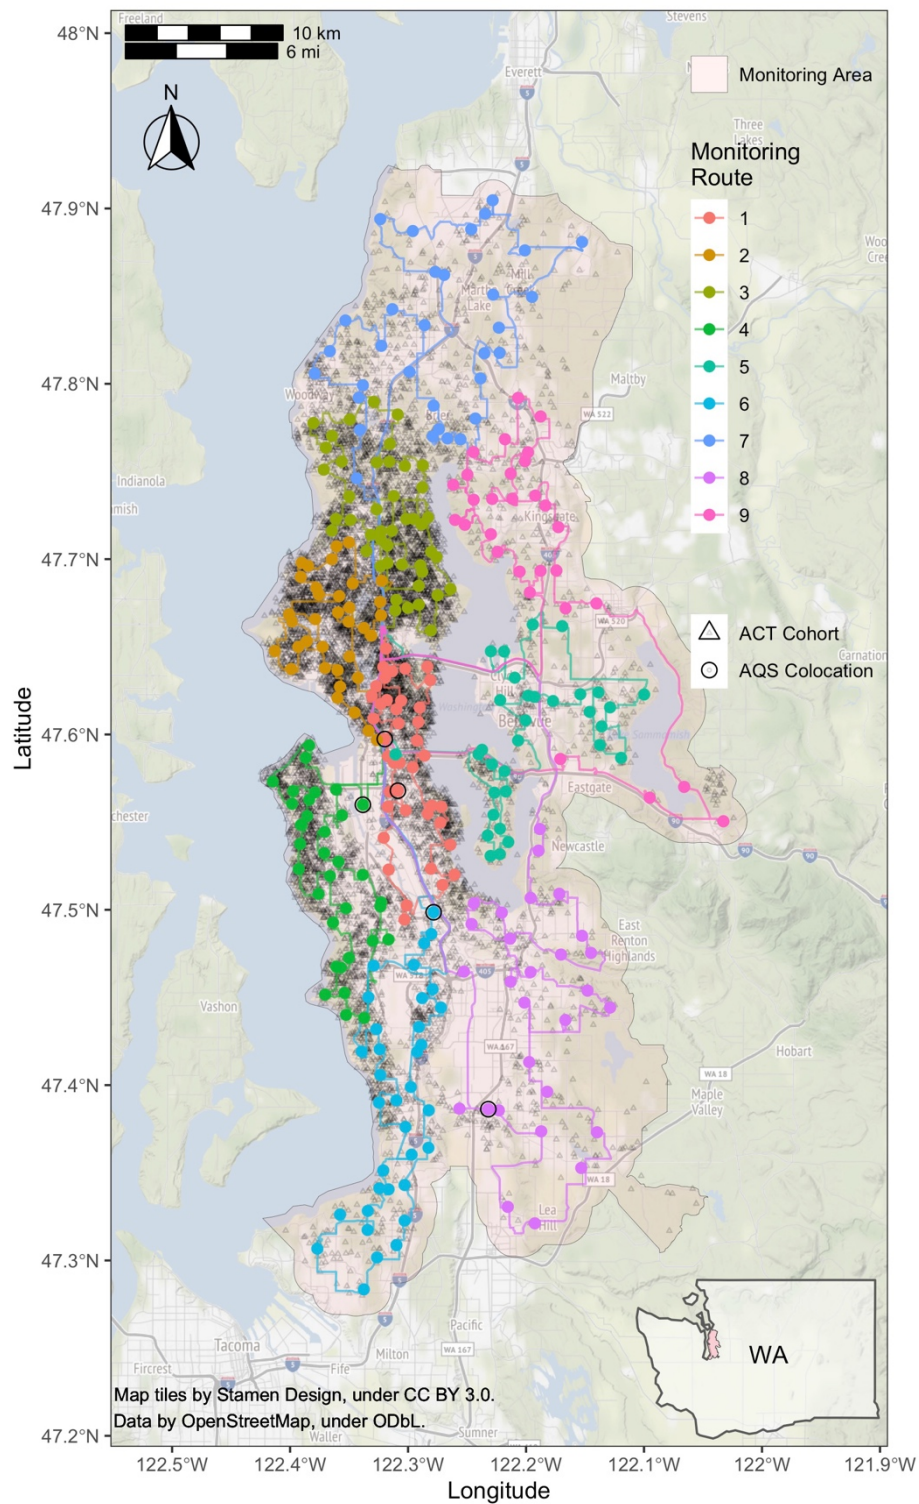

126

127 *Figure 1. Mobile monitoring routes (n=309 stops along 9 routes) and jittered ACT cohort locations (n=10,330 unique locations).*  
128 *Inset map shows the monitoring area within Washington (WA) state.*

129



130

## 131 2.2 Fixed Routes

132

133 We used ArcMap's Network Analyst New Route tool<sup>32</sup> and Google Maps<sup>34</sup> to develop  
134 nine fixed routes based on the 309 stop monitoring sites. Each route ranged from 75-168 km (47-  
135 104 miles) in length and had 28-40 stops (SI Table S1). All routes started and ended at the  
136 University of Washington and were intended to maximize residential driving coverage (i.e.,  
137 reduce highway driving and driving on the same roads). Routes were downloaded from Google  
138 Maps to a smart phone and Garmin GPS Navigation System, and navigation was set to replicate  
139 the same route each time regardless of traffic conditions.

140

## 141 2.3 Sampling Schedule

142

143 Sampling was conducted from March 2019 through March 2020 during all seasons and  
144 days of the week between the hours of 4 AM and 11 PM. Our previous work has shown that this  
145 balanced but slightly reduced sampling schedule taking driver safety and operational logistics  
146 into consideration should still generally produce unbiased annual averages.<sup>29</sup> This work further  
147 showed that the temporal sampling design rather than the visit sampling duration has the largest  
148 impact on the accuracy of the annual average estimates, and that common sampling designs like  
149 weekday business and rush hours regularly produce more biased annual averages. To increase  
150 temporal coverage, routes were started at different times of the day and driven in both clockwise  
151 and counterclockwise directions. A single route was driven each day (~4-8 drive hours). Make-  
152 up site visits were conducted throughout the study to resample sites with missing readings (i.e.,

153 due to instrumentation or driver errors). Make-up visits occurred during similar times as the  
154 originally scheduled sampling time (i.e., season, day of the week, general time of day).

155 Twenty-eight two-minute samples were scheduled to be collected at each stop site while  
156 the vehicle was parked along the side of the road. This design choice was justified by our  
157 additional analyses of one-minute data from a near-road and a background regulatory site in  
158 Seattle. These analyses showed that at least 25 two-minute samples were sufficient to produce  
159 annual average estimates with a low average percent error (See SI Figure S2). Furthermore, there  
160 was only a negligible improvement in annual average estimates when the sampling duration was  
161 extended from 2 to 60 minutes.

162

## 163 2.4 Data Collection

164

165 We equipped a Toyota Prius hybrid vehicle with fast-response (1-60 sec), high-quality  
166 instrumentation that measured various particle and gas pollutants. Pollutants included BC  
167 (AethLabs MA200), NO<sub>2</sub> (Aerodyne Research Inc. CAPS), PM<sub>2.5</sub> (Radiance Research M903  
168 nephelometer), CO<sub>2</sub> (Li-Cor LI-850), and PNC with various instruments, including two TSI P-  
169 TRAK 8525's (one unscreened – the primary instrument in this analysis, and one with a  
170 diffusion screen), a TSI NanoScan 3910, and Testo DiSCmini. PNC serves as a surrogate for  
171 UFP since most particles by count are smaller than 100 nm.<sup>35</sup> CO measurements were also  
172 collected, but these were not included in this analysis because they did not meet our quality  
173 standards. The platform additionally collected temperature, relative humidity, and global  
174 positioning with real-time tracking. See SI Table S2 for instrumentation details, including the  
175 manufacturer-reported size ranges for the four PNC instruments. We had duplicates (back-ups)

176 of every instrument type that were periodically collocated for quality assurance purposes (see  
177 Quality Assurance and Quality Control). SI Note S2 and Figures S3-S4 have additional details  
178 on the platform configuration and data collection procedures.

179

## 180 2.5 Quality Assurance and Quality Control

181

182 We conducted various quality assurance and quality control (QAQC) activities  
183 throughout the study period to ensure the reliability and integrity of our data. Activities included  
184 calibrating gas instruments; checking particle instruments for zero concentration responses;  
185 assessing collocated instruments for agreement; inspecting time series data for concentration  
186 pattern anomalies; and dropping readings associated with instrument error codes or those outside  
187 the instrument measurement range. SI Section S1.3 has additional details.

188

## 189 2.6 Site Visit Summaries

190

191 All data analyses were conducted in R (v 3.6.2, using RStudio v 1.2.5033; see SI Note S3  
192 for computing details).<sup>36</sup>

193 We calculated the median pollutant concentrations for each two-minute site visit. While  
194 means can be highly influenced by large concentration deviations (which may be important in  
195 some settings), medians are more robust to outliers and may better capture the typical values of  
196 skewed data.

197 We estimated PM<sub>2.5</sub> concentrations from nephelometer readings using a calibration curve  
198 fit to regulatory monitoring data between 1998-2017 (SI Equation S1). Nephelometer light

199 scattering is strongly correlated with  $PM_{2.5}$  and has been used in the Puget Sound region to  
200 monitor air quality since 1967.<sup>37</sup> We fit the model using daily average measurements from nine  
201 non-industrial regulatory air monitoring sites in the region where both  $PM_{2.5}$  (using federal  
202 reference methods) and nephelometer light scattering data were collected. We excluded the years  
203 2008-2009 due to nephelometer instrumentation issues noted by the local regulatory agency. The  
204 model's leave-one-site-out cross-validated  $R^2$  and root mean square error (RMSE) were 0.92 and  
205  $1.97 \mu\text{g}/\text{m}^3$ , respectively.

206 Site visit medians and annual averages for BC,  $\text{NO}_2$  and  $PM_{2.5}$  estimated from these data  
207 were compared against estimates from the five regulatory air monitoring collocation sites.

208

## 209 2.7 Spatial and Temporal Variability

210

211 We ran analysis of variance (ANOVA) models for each pollutant to characterize the  
212 relative variability of the site visit level data over space, time, and within site. The independent  
213 variables for each pollutant model were the site ( $n=309$ ), season ( $n=4$ ), day of the week ( $n=7$ ),  
214 and hour of the day ( $n=21$ ), while the dependent variable was median visit concentrations.

215

## 216 2.8 Estimation of Annual Averages

217

218 We calculated winsorized annual average concentrations for each site such that  
219 concentrations below the 5<sup>th</sup> and above the 95<sup>th</sup> quantile concentration were substituted with the  
220 5<sup>th</sup> and 95<sup>th</sup> quantile concentration, respectively (mean of winsorized medians). This was done to  
221 reduce the influence of large outlier concentrations on the annual average. In sensitivity analyses,  
222 we calculated non-winsorized averages (mean of medians) and medians (median of medians).

223

## 224 2.9 Annual Average Prediction Models

225

226

227

228

229

230

231

232

233

234

235

236

237

238

239

240

Development of annual average prediction models allows the predictions to be used for epidemiologic inference. The data were randomly split into a training-validation (90%, n=278 sites) and a test (10%, n=31 sites) set. The training-validation set was used to select the 191 geographic covariate predictors (e.g., land use, roadway proximity) that had sufficient variability and a limited number of outliers from 350 original covariates (see SI Notes S5 for details). These were summarized using pollutant-specific partial least squares (PLS) regression components. We built pollutant-specific universal kriging (UK) models for annual average concentrations, using log-transformed concentrations as the dependent variable and the first three geocovariate PLS principal components as the independent variables (Equation 1). We used UK rather than land use regression (LUR) alone since UK uses geospatial smoothing to capture any residual spatial correlation not otherwise captured by LUR. We selected the kriging variogram model for the geostatistical structure using the `fit.variogram` function in the `gstat`<sup>38</sup> R (v 3.6.2, using RStudio v 1.2.5033)<sup>36</sup> package.

$$\text{Log}(\text{Conc}) = \alpha + \sum_{m=1}^M \theta_m Z_m + \varepsilon$$

241

242

243

*Equation 1. Universal kriging with partial least squares models for annual average pollutant concentrations. Conc is the pollutant concentration,  $Z_m$  are the PLS principal component scores ( $M=3$ ),  $\alpha$  and  $\theta_m$  are estimated model coefficients, and  $\varepsilon$  is the residual term with mean zero and a modeled geostatistical structure.*

244

245

246

We used RMSE and mean square error (MSE) -based  $R^2$  to evaluate the performance of each pollutant model on the native scale using ten-fold cross-validation and test sites. We used

247 MSE-based  $R^2$  instead of traditional, regression-based  $R^2$  because it evaluates whether  
248 predictions and observations are the same (around the one-to-one line) such that it assesses both  
249 bias and variation around the one-to-one line. Regression-based  $R^2$ , on the other hand, solely  
250 assesses whether pairs of observations are linearly associated, regardless of whether observations  
251 are the same or not.

252

## 253 3 Results

254

### 255 3.1 Data Collected

256

257 After dropping stop concentrations that did not meet the quality assurance standards  
258 (0.61%), the final analyses included over 70,000 two-minute median stop samples (almost 9,000  
259 samples per instrument) collected over the course of 288 drive days from 309 monitoring sites  
260 (Table S7). Sites were sampled an average of 29 times, ranging from 26 to 35 times. Due to the  
261 logistical constraints of sampling 309 sites with one platform along nine fixed routes, some sites  
262 were visited fewer times of the day than other sites, though sampling times were still well  
263 distributed throughout the day (e.g., morning [e.g., 7 AM], afternoon [e.g., 3 PM] and evening  
264 [e.g., 8 PM]; see SI Figure S7). SI section S2.1 Site Visits has additional details on the visit-level  
265 pollutant concentrations used to estimate site annual averages.

266

### 267 3.2 Collocations at Regulatory Monitoring Sites

268

269 Median two-minute BC, NO<sub>2</sub> and PM<sub>2.5</sub> measurements from mobile monitoring stops  
270 were generally in agreement with measurements from regulatory sites (MSE-based R<sup>2</sup>: BC =  
271 0.69, NO<sub>2</sub> = 0.71, PM<sub>2.5</sub> = 0.61; SI Figure S12). Annual average estimates from our mobile  
272 monitoring campaign measurements were similar to annual average estimates from comparable  
273 two-minute samples at regulatory monitoring sites used as collocations, and these were in  
274 moderate agreement with true annual average concentrations at those sites (based on all of the  
275 available data during the study period; SI Figure S13).

276

### 277 3.3 Spatial and Temporal Variability

278

279 Pollutant-specific ANOVA models of winsorized site visit concentrations indicated most  
280 of the concentration variability occurred within sites, rather than across sites or over time (SI  
281 Figure S14). After accounting for time and site, PNC from the P-TRAK instrument had the  
282 highest within-site variability (82% of the total), followed by PM<sub>2.5</sub> (87%), BC (80%), CO<sub>2</sub>  
283 (70%), and lastly, NO<sub>2</sub> (66%). CO<sub>2</sub> (27%) had the most temporal variability, followed by NO<sub>2</sub>  
284 (24%), BC (16%), PM<sub>2.5</sub> (13%), and PNC (6%), respectively. Finally, PNC (12%) had the most  
285 spatial variability, followed by NO<sub>2</sub> (10%), BC (4%), CO<sub>2</sub> (3%) and PM<sub>2.5</sub> (<1%), respectively.  
286 Unlike other pollutants, PNC had more spatial than temporal variability. SI Figure S14 shows  
287 similar results for other PNC instruments.

288

### 289 3.4 Annual Average Estimates

290

291 Estimated annual average pollutant concentrations across all monitoring sites are shown  
292 in SI Figure S15. There was a 5- to 6- fold difference between the lowest and highest site  
293 concentrations of PNC, NO<sub>2</sub>, and BC. On the other hand, PM<sub>2.5</sub> had a 2-fold difference across  
294 sites, while CO<sub>2</sub> varied little across sites. Among PNC instruments, the screened P-TRAK  
295 measured the lowest concentrations and had the smallest variability; the P-TRAK, which did not  
296 screen out particles below 36 nm, had the second-highest averages with approximately double  
297 the values and more variability. The DisSCmini and Nanoscan had higher medians, more  
298 variability, and more outlying annual average concentrations. SI Figures S16-S17 map these  
299 concentrations. The locations with the highest BC, NO<sub>2</sub>, and PNC concentrations were near the  
300 Seattle urban core. High PNC concentration sites were additionally located at more southern  
301 locations near the area's major airport, the Seattle-Tacoma (Sea-Tac) International Airport. Sites  
302 with elevated PM<sub>2.5</sub> and CO<sub>2</sub> levels were dispersed throughout the monitoring region.

303

### 304 3.5 Prediction Models

305

306 Based on the training-validation set, the first three PLS principal components captured  
307 between 49-51% of the observed concentration variability for each pollutant model. Loadings  
308 from the first PLS principal component indicated that normalized difference vegetation index  
309 (NDVI), length of bus routes, major roadways, land development, population density, and truck  
310 routes were strong predictors of air pollution in the region, with some pollutants, for example  
311 PNC, being more influenced by these land features (SI Figure S18). Cross-validated MSE-based  
312 R<sup>2</sup> (and RMSE) values for UK-PLS models were 0.77 (1,177 pt/cm<sup>3</sup>) for PNC, 0.60 (102 ng/m<sup>3</sup>)  
313 for BC, 0.77 (1.3 ppb) for NO<sub>2</sub>, 0.70 (0.3 μg/m<sup>3</sup>) for PM<sub>2.5</sub>, and 0.51 (4.2 ppm) for CO<sub>2</sub> (SI Table



314 S9). In the independent test set, these results differed somewhat with estimates of MSE-based  $R^2$   
315 (and RMSE) of 0.78 (815  $\text{pt}/\text{cm}^3$ ) for PNC, 0.80 (60  $\text{ng}/\text{m}^3$ ) for BC, 0.84 (0.9 ppb) for  $\text{NO}_2$ , 0.73  
316 ( $0.3 \mu\text{g}/\text{m}^3$ ) for  $\text{PM}_{2.5}$ , and 0.77 (2.7 ppm) for  $\text{CO}_2$ . Sensitivity analyses using mean of medians  
317 and median of medians annual averages performed similar or slightly lower due to changes in the  
318 number of influential points and/or reduced overall variability (SI Table S9). These model  
319 performances are reflected in the generally good agreement between the estimates and cross-  
320 validated predictions (Figure S19). All PNC instruments do show a few underpredicted  
321 observations.

322 Model predictions for the monitoring region are shown in Figure 2 (predictions from  
323 additional PNC instruments are shown in Figure S20). While  $\text{PM}_{2.5}$  and  $\text{CO}_2$  are fairly spatially  
324 homogeneous, PNC, BC, and  $\text{NO}_2$  (traditional TRAPs) show higher concentrations in the urban  
325 core and along major roads. In addition, PNC shows higher concentration near the area's major  
326 airport. All the PNC instruments reflect this broad pattern, although there are differences across  
327 instruments in the areas with the highest predicted concentrations.

328

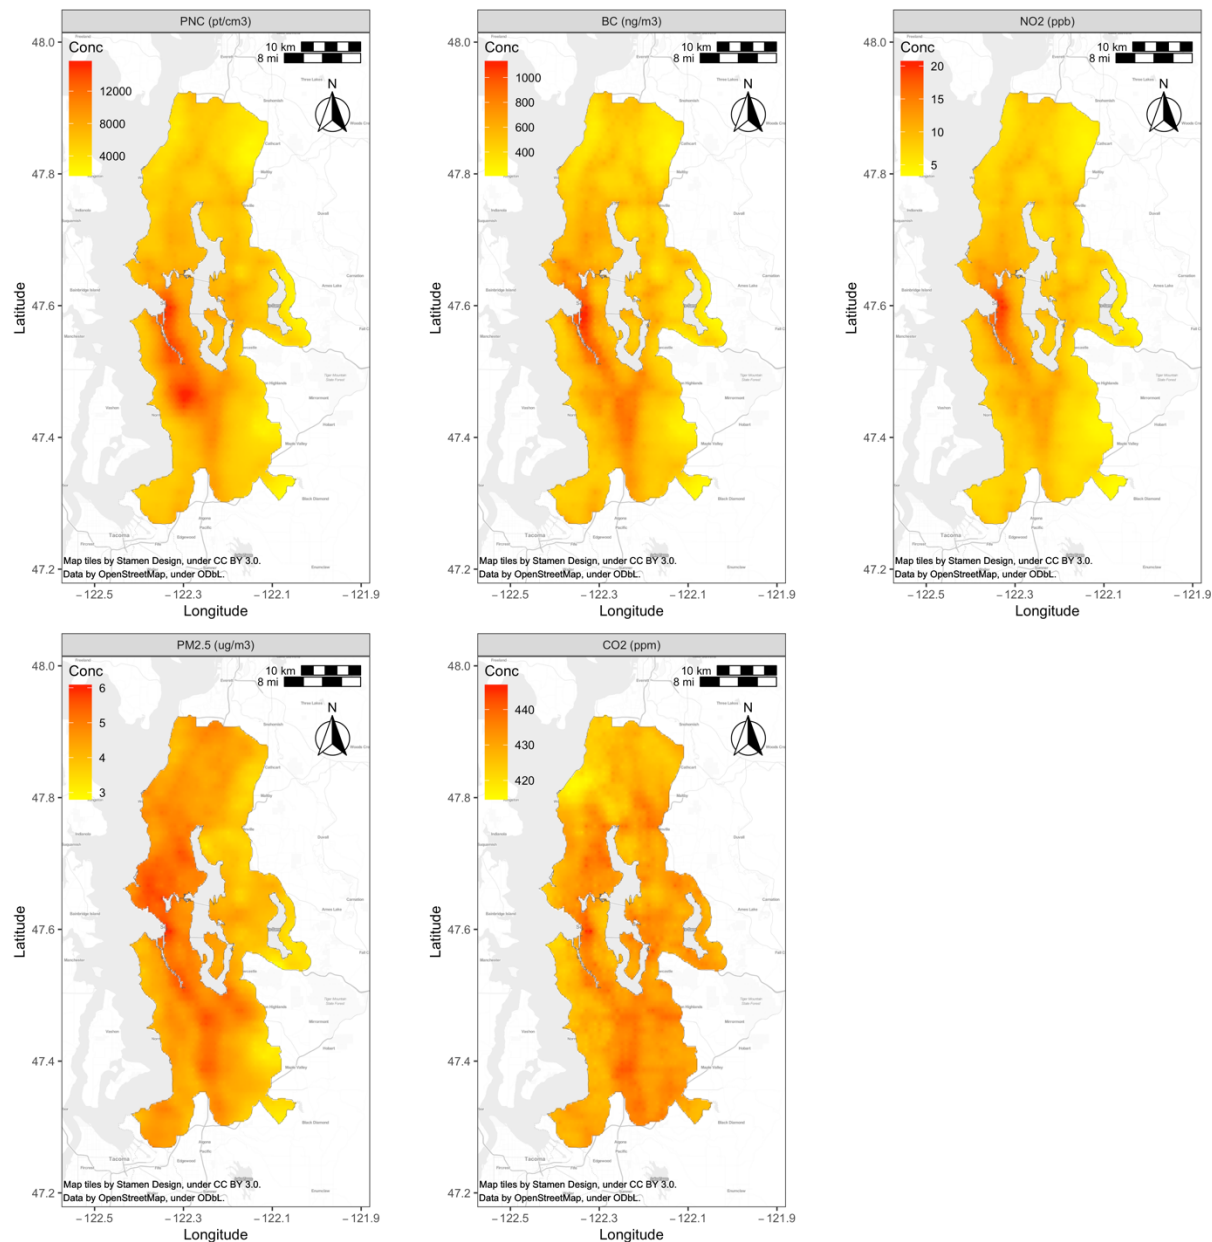

329

330 *Figure 2. UK-PLS pollutant predictions for the monitoring region.*

331

332

333 Pearson correlation coefficients ( $R$ ) for pollutant model predictions at the 309 monitoring

334 sites and all instruments are shown in SI Figure S21. Different PNC instruments were generally

335 well correlated with each other ( $R = 0.85-0.97$ ). Overall, PNC from the P-TRAK, BC, and  $\text{NO}_2$

336 were well correlated with each other ( $R = 0.81-0.92$ ), and moderately correlated with  $\text{PM}_{2.5}$  and

337 CO<sub>2</sub> (R = 0.39-0.70). CO<sub>2</sub> and PM<sub>2.5</sub> were moderately correlated with each other (R = 0.46). The  
338 biggest deviations from a linear association were evident for the predicted high concentrations  
339 from the DiSCmini; this was particularly apparent in its relationship with BC, NO<sub>2</sub>, PM<sub>2.5</sub>, and  
340 CO<sub>2</sub>.

341

## 342 4 Discussion

343

344 In this paper, we describe the design of an innovative mobile monitoring campaign  
345 specifically developed to estimate unbiased, highly spatially resolved, long-term TRAP  
346 exposures in an epidemiologic cohort. To date, this is one of the most extensive mobile  
347 monitoring campaigns conducted in terms of the pollutants measured (five pollutants measured  
348 with eight different instruments, not including CO) spatial coverage (~1,200 land km<sup>2</sup>), sampling  
349 density (309 monitoring sites along 9 routes, or 1 monitor every 3.9 land km<sup>2</sup>), and sampling  
350 frequency (7 days a week; 288 days over a one-year period) and duration (~5 driving hours per  
351 day between the hours of 4 AM – 11 PM). The spatial resolution achieved by this campaign was  
352 significantly greater than would be expected from fixed regulatory monitoring approaches. We  
353 had one monitor per 3.9 km<sup>2</sup> of land area rather than 183 km<sup>2</sup> (6 regulatory sites in the  
354 monitoring area), almost a 50-fold increase. The average (SD) distance from an ACT cohort  
355 location to the nearest monitoring site was 611 (397) m rather than 5,805 (2,805) m to an AQS  
356 site, almost a ten-fold difference. Monitor proximity to prediction (i.e., cohort) locations, both in  
357 terms of geographic and covariate distance, is an important determinant of accurate exposure  
358 assessment.<sup>39,40</sup> Additionally, we previously showed that the extensive temporal sampling of this  
359 campaign across hours, days of the week and seasons is expected to produce more accurate and

360 unbiased annual average estimates as compared to more common campaigns with reduced  
361 sampling.<sup>29</sup>

362 A unique aspect of this campaign was the collection of stationary samples along the side  
363 of the road. While most other campaigns have only collected non-stationary, on-road samples,  
364 various studies have shown that mobile samples are generally higher in concentration than  
365 stationary samples.<sup>21,41-44</sup> The completion of our stationary and non-stationary campaign  
366 positions us to conduct future work on how non-stationary data may be used responsibly for  
367 epidemiologic applications. Among the relatively few campaigns that have collected stationary  
368 rather than mobile samples alone, most have sampled for longer than two minutes (about 15-60  
369 minutes per stop).<sup>45</sup> Our analyses indicated that shorter sampling periods produce comparably  
370 good estimates without adding excessive amounts of stationary sampling time to mobile  
371 monitoring campaigns (See SI Figure S2). Our use of a hybrid vehicle meant that the vehicle's  
372 engine was off and it operated by battery during stop sampling periods, thus reducing the  
373 possibility of self-contamination.

374 ANOVA model results indicate differences across pollutants in terms of their spatial and  
375 temporal variability. This finding is particularly relevant for short-term mobile monitoring  
376 campaigns, which could design their campaigns to adequately capture the variability of the  
377 pollutants of interest. These findings suggest that repeated sampling at any given site is crucial  
378 since most of the variability for all measured pollutants was seen within sites, even after  
379 adjusting for time. Following that, all pollutants other than PNC had relatively more temporal  
380 than spatial variability. Campaigns measuring these pollutants may thus benefit by inclusion of  
381 more temporally-balanced site visits. PNC, on the other hand, has slightly more spatial than  
382 temporal variability suggesting that both are important. The implementation of these concepts for

383 epidemiologic exposure assessment should translate to reduced exposure misclassification.  
384 Overall, our results are in line with past literature that has shown differing spatial and temporal  
385 contrasts across pollutants,<sup>46,47</sup> though our work increases the robustness of these findings using  
386 a more spatially resolved, multi-pollutant dataset that includes less commonly measured PNC.

387 The findings from this campaign demonstrate the region's generally low air pollution  
388 levels. The range of annual concentrations across sites for PM<sub>2.5</sub> (3.4-7.2 µg/m<sup>3</sup>) and NO<sub>2</sub> (3.9-  
389 23 ppb) were well below the National Ambient Air Quality Standards (NAAQS) annual average  
390 levels of 12 µg/m<sup>3</sup> and 53 ppb, respectively.<sup>48</sup> Annual PNC (~7,000 pt/cm<sup>3</sup>) and BC (~600  
391 ng/m<sup>3</sup>) site concentrations were lower than what others have reported in cities throughout the  
392 world where mean study values range from roughly 6,000-64,000 PNC pt/cm<sup>3</sup> and 400-14,000  
393 BC ng/m<sup>3</sup> (PNC<sup>21,42,43,49-63</sup>; BC<sup>19,21,43,52,53,58,63-75</sup>). While CO<sub>2</sub> site concentrations (417-455 ppm)  
394 were above the 2019 global average of 412 ppb,<sup>76</sup> they were in line with past work noting  
395 elevated carbon footprint levels in dense, high-income cities and affluent suburbs.<sup>77,78</sup> Still, the  
396 high concentration variability seen across sites for pollutants like PNC, BC and NO<sub>2</sub> suggests  
397 that future epidemiological analyses may have more power to observe health effects from these  
398 pollutants than those that are less spatially variable, for example PM<sub>2.5</sub> and CO<sub>2</sub>.

399 The similarity between BC, NO<sub>2</sub> and PM<sub>2.5</sub> measurements from our campaign and  
400 collocated regulatory monitoring sites confirms that our campaign estimates were generally  
401 accurate. Some of the discrepancies between the two monitoring approaches may be due to  
402 differences in the sampling instrumentation, the exact sampling location, and quality assurance  
403 and quality control procedures. While we were unable to compare CO<sub>2</sub> or PNC measurements to  
404 regulatory observations, duplicate instrument collocations generally showed good agreement (SI

405 Figure S6). Additionally, CO<sub>2</sub> instruments were regularly calibrated and PNC instruments  
406 completed zero checks (SI Table S3, Figure S5).

407 We observed elevated annual average pollutant levels near areas with low green space (as  
408 quantified by normalized difference vegetation index [NDVI]), bus routes, major roadways, and  
409 impervious surfaces. These findings are generally in line with past work.<sup>79</sup>

410 While future mobile monitoring campaigns may be guided by the design and findings  
411 from this study, it's notable that the unique geographical, meteorological and source  
412 characteristics of different airsheds may produce slightly different results. These results do  
413 highlight, however, the importance of collecting multi-pollutant measurements, particularly in  
414 urban or other areas characterized by major emission sources such as airports or railroad  
415 systems, which may be important contributors to local and/or regional air pollution levels. This is  
416 particularly true for PNC given the limited monitoring data available and its unique spatial and  
417 temporal patterns. More generally, multi-pollutant exposure assessment is a growing interest in  
418 the field of air pollution epidemiology,<sup>46,80-83</sup> and something that we are positioned to make a  
419 meaningful contribution to in future work.

420 While UFPs are generally characterized as particles under 100 nm in diameter, this  
421 definition is not standardized and varies from instrument to instrument as well as study to study.  
422 Since most particles by count are in the smaller size range with few above 100 nm,<sup>35</sup> PNC should  
423 adequately characterize UFPs. Moreover, the collection of PNC from multiple instruments in a  
424 field setting is unique to this study. PNC measures from different instruments were strongly  
425 correlated with each other, and they produced broadly similar spatial surfaces, strengthening our  
426 confidence in the quality of our measurements. Differences in the reported PNC levels across  
427 instruments, however, can be attributed to multiple factors including differences in technology,

428 each technology's unique particle size detection efficacy, and built-in calibration (if present), all  
429 of which impact the reported particle size ranges and concentrations of each instrument.  
430 Differences across PNC instruments in the predicted absolute concentrations as well as overall  
431 spatial surfaces highlight these differences. By comparing PNC levels from the unscreened and  
432 screened P-TRAK, for example, we see that roughly half of the measured (and predicted)  
433 particles are between 20-36 nm (SI Figure S20). Furthermore, these smaller particles are more  
434 concentrated near the area's major airport, the Sea-Tac International Airport. The DiSCmini also  
435 captures this rise in PNC near the airport but shows much lower relative concentrations  
436 elsewhere, suggesting it measures smaller particles well. Reasons could include the different  
437 measurement technology as well as the manufacturer's reported lower particle size cut of 10 nm.  
438 The NanoScan total concentration, on the other hand, reports concentrations that are roughly  
439 50% higher than the unscreened P-TRAK, with elevated PNC levels near the airport, but also in  
440 other parts of the monitoring region, including south of the airport along major roadways and at  
441 the Seattle urban core. Elevated PNC levels are thus predicted from the NanoScan in a larger  
442 area of the monitoring region.

443         It is an open question whether the use of different PNC instruments across epidemiologic  
444 studies makes cross-study comparisons and coherent causal determinations difficult, or whether  
445 these differences still produce interpretable findings for the field as a whole.<sup>84</sup> We are well-  
446 positioned to further investigate this question of how different instruments pick up UFPs in  
447 future work. We observed, for example, a slightly non-linear relationship between the DiSCmini  
448 and all other PNC instruments when the predicted concentrations were high (SI Figure S21). A  
449 non-linear trend was also present when comparing the BC, NO<sub>2</sub>, PM<sub>2.5</sub>, and CO<sub>2</sub> predictions to  
450 those from the DiSCmini, but less so when comparing these to the PNC predictions from other

451 instruments. Furthermore, we will be able to use of size-resolved particle counts from the  
452 NanoScan (13 size bins, data not shown) or by looking at the differences between the unscreened  
453 and screened P-TRAKs, where the minimum sizes are 20 and 36 nm, respectively, in order to  
454 characterize size-specific exposure surfaces, sources, and health effects.

455 A feature of mobile monitoring campaigns is their reliance on repeated, short-term  
456 samples in order to achieve increased spatial coverage when compared to traditional long-term  
457 monitoring approaches. Since we collected about 29 two-minute samples per site (about an hour  
458 of data), we recognize that the resulting annual average site estimates are noisy. Still, with MSE-  
459 based  $R^2$  values of 0.77 for PNC and 0.60 for BC, our models performed better than many other  
460 short-term stationary and non-stationary monitoring campaigns ( $R^2$  of approximately 0.13-0.72  
461 for PNC<sup>21,42,43,49,50,53-56,58-63,68,85-91</sup> and 0.12-0.86 for BC.<sup>21,53,58,63,68,71,72,75</sup> Figure 3 illustrates  
462 these results as well as those from other long-term stationary campaigns. There are several  
463 features of our study design that could have impacted our strong model performances. For PNC,  
464 Saha et al. (2019) reported that short-term stationary (collecting short-term samples while  
465 stopped, as opposed to while moving or traditional long-term stationary sampling) studies like  
466 ours have generally sampled between 60-644 sites, sampled each site between 15 minutes and 3  
467 hours, and collected between 1-5 repeat samples per site. Similarly, BC studies like this one have  
468 generally sampled 26-161 sites, sampled each site about 30 minutes, and collected about 2-3  
469 samples per site. Campaigns with more site counts have generally collected fewer repeat samples  
470 per site. Compared to earlier studies, we sampled more sites than most fixed and short-term  
471 stationary studies (309 sites). This dense monitoring network covered a larger geographic area  
472 and likely allowed us to capture hotspots that may have otherwise been missed by more sparse  
473 monitoring networks. Additionally, we visited each site for shorter periods of time (2 minutes),



474 which allowed us to collect more repeat site visits (approximately 29) than what most studies  
 475 have done. While our resulting total site sampling durations (~58 minutes) were similar to other  
 476 short-term stationary studies, we captured more temporal variability by sampling year-around  
 477 during all days of the week and most times of the day, a limitation of most past campaigns. SI  
 478 Figures S22-S23 summarize these as well as other short-term non-stationary mobile monitoring  
 479 and long-term stationary designs for PNC<sup>21,42,43,49,50,53-63,68,85-92</sup> and BC.<sup>21,53,58,63-75</sup>  
 480

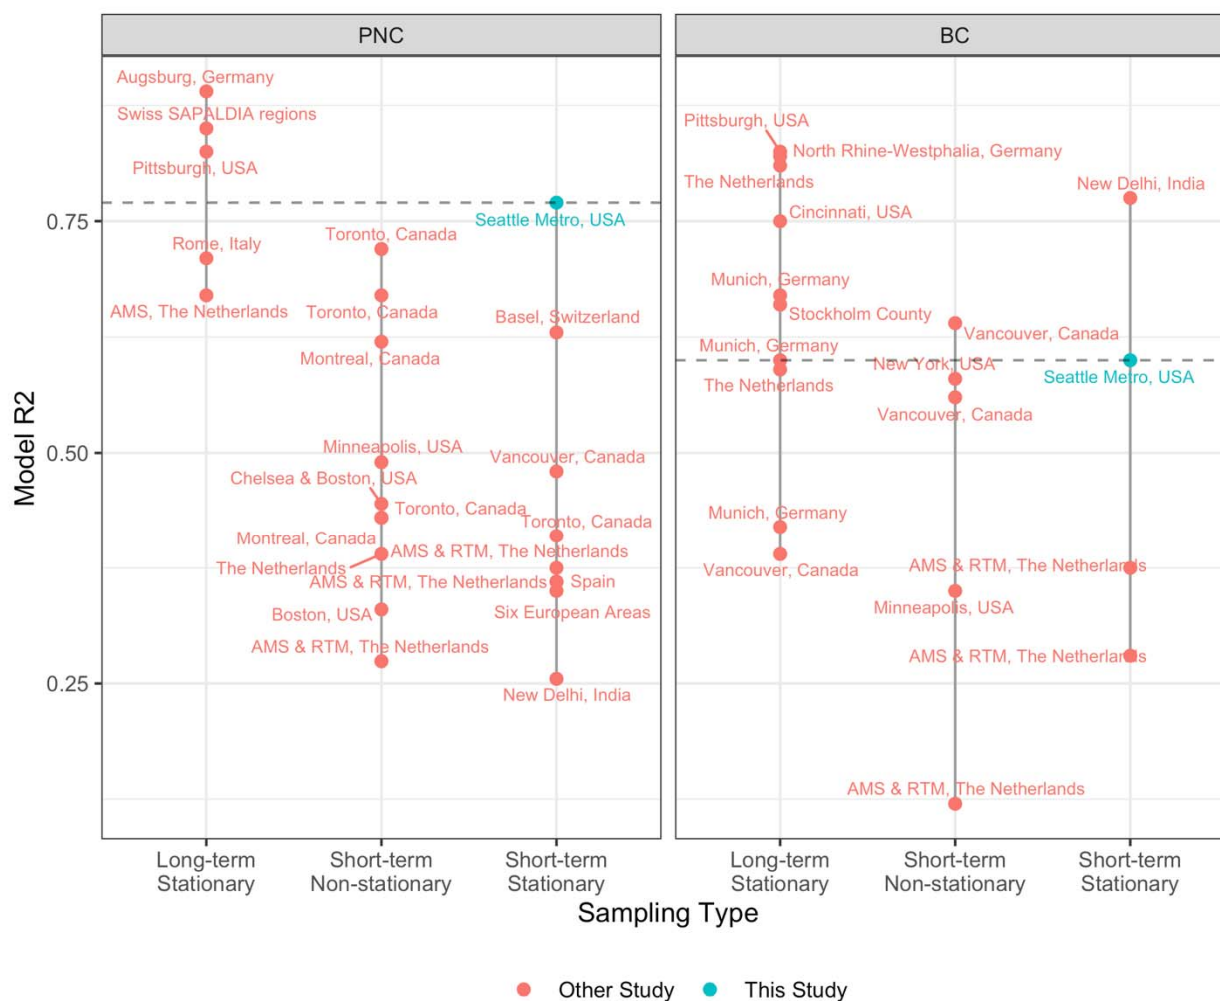

AMS = Amsterdam; UT = Utrecht

481  
 482 Figure 3. Cross-validated model  $R^2$  estimates from our and other PNC<sup>21,42,43,49,50,53-63,68,85-90,92</sup> and BC<sup>21,53,58,63-75</sup>  
 483 studies. Studies are stratified by whether the sampling type was traditional, fixed site sampling (long-term stationary), short-  
 484 term mobile monitoring campaigns that collected on-road data while in motion (short-term non-stationary), or short-term  
 485 term mobile monitoring campaigns that collected data while stopped (short-term stationary). Figure does not include Saha et al.

486 (2021),<sup>91</sup> who used a mixed sampling approach for PNC from multiple sources ( $R^2$ : 0.54-0.72). Horizontal dashed line is the  $R^2$  for  
487 this study. Plots show the average  $R^2$  from a study if multiple models were presented without a clear primary model.

488

489 In terms of our modeling approach, long-term averaging and winsorizing reduces the variability  
490 of the observations and focuses on the spatial contrasts of interest; this could have resulted in  
491 better performing models than had we modeled concentrations without aggregating them to a  
492 annual averages (e.g., stop medians). Sensitivity analyses using mean of (non-winsorized)  
493 medians, for example, generally resulted in slightly lower performing PNC and  $PM_{2.5}$  models  
494 due to the inclusion of more influential points in the models. Using a measure more robust to  
495 extreme observations, the median of medians, produced lower performing  $CO_2$  models due to the  
496 further reduction in variability. Still, we reported good out-of-sample MSE-based  $R^2$  estimates,  
497 which better characterize a model's predictive performance at new locations and are generally  
498 lower than the in-sample regression-based  $R^2$  estimates that many studies report. We estimated  
499 these higher model performances despite the lower air pollution levels in our monitoring region,  
500 which can make it harder to get good prediction performance due to reduced variability (e.g.,  
501  $CO_2$ ).

502 Overall, these results demonstrates that the design of this campaign captured the spatial  
503 pollutant variations that can be explained by sensible land use features well, including those  
504 related to traffic. These data will thereby produce robust and representative long-term average  
505 TRAP exposures for the ACT cohort. Next steps include applying these prediction models to the  
506 cohort and conducting inferential analyses to determine the association of these pollutants with  
507 brain health. The rich dataset from this extensive campaign also provides an excellent foundation  
508 for investigating many important questions about how to best design mobile monitoring  
509 campaigns for application to subsequent epidemiologic studies.

510

## 511 5 Acknowledgements

512

513 We are grateful to our two drivers, Jim Sullivan and Dave Hardie, for all of their efforts  
514 collecting these data, and to Brian High for building and supporting the database.

515 This work was funded by the Adult Changes in Thought – Air Pollution (ACT-AP) Study  
516 (National Institute of Environmental Health Sciences [NIEHS], National Institute on Aging  
517 [NIA], R01ES026187), BEBTEH: Biostatistics, Epidemiologic & Bioinformatic Training in  
518 Environmental Health (NIEHS, T32ES015459), and the University of Washington  
519 Interdisciplinary Center for Exposure, Disease, Genomics & Environment (NIEHS, 2P30  
520 ES007033-26). Research described in this article was conducted in part under contract to the  
521 Health Effects Institute (HEI), an organization jointly funded by the United States Environmental  
522 Protection Agency (EPA) (Assistance Award No. CR-83998101) and certain motor vehicle and  
523 engine manufacturers. The contents of this article do not necessarily reflect the views of HEI, or  
524 its sponsors, nor do they necessarily reflect the views and policies of the EPA or motor vehicle  
525 and engine manufacturers.

## 526 6 References

- 527  
528 1. Brunekreef B, Holgate ST. Air pollution and health. *The Lancet*. Published online 2002.  
529 doi:10.1016/S0140-6736(02)11274-8
- 530 2. Allen JL, Klocke C, Morris-Schaffer K, Conrad K, Sobolewski M, Cory-Slechta DA.  
531 *Cognitive Effects of Air Pollution Exposures and Potential Mechanistic Underpinnings.*;  
532 2017. doi:10.1007/s40572-017-0134-3
- 533 3. Kilian J, Kitazawa M. The emerging risk of exposure to air pollution on cognitive decline and  
534 Alzheimer's disease - Evidence from epidemiological and animal studies. *Biomed J*.  
535 2018;41(3):141-162. doi:10.1016/j.bj.2018.06.001
- 536 4. Power MC, Adar SD, Yanosky JD, Weuve J. Exposure to air pollution as a potential  
537 contributor to cognitive function, cognitive decline, brain imaging, and dementia: A  
538 systematic review of epidemiologic research. *NeuroToxicology*. 2016;56:235-253.  
539 doi:10.1016/j.neuro.2016.06.004
- 540 5. Weuve J, Bennett EE, Ranker L, et al. Exposure to Air Pollution in Relation to Risk of  
541 Dementia and Related Outcomes: An Updated Systematic Review of the Epidemiological  
542 Literature. *Environ Health Perspect*. 2021;129(9):096001. doi:10.1289/EHP8716
- 543 6. Delgado-Saborit JM, Guercio V, Gowers AM, Shaddick G, Fox NC, Love S. A critical review  
544 of the epidemiological evidence of effects of air pollution on dementia, cognitive function  
545 and cognitive decline in adult population. *Sci Total Environ*. 2021;757:143734.  
546 doi:10.1016/j.scitotenv.2020.143734
- 547 7. Karner AA, Eisinger DS, Niemeier DA. Near-roadway air quality: Synthesizing the findings  
548 from real-world data. *Environ Sci Technol*. 2010;44(14):5334-5344.  
549 doi:10.1021/es100008x
- 550 8. Seaton A, Godden D, MacNee W, Donaldson K. Particulate air pollution and acute health  
551 effects. *The Lancet*. 1995;345(8943):176-178. doi:10.1016/S0140-6736(95)90173-6
- 552 9. Lundborg M, Johard U, Låstbom L, Gerde P, Camner P. Human Alveolar Macrophage  
553 Phagocytic Function is Impaired by Aggregates of Ultrafine Carbon Particles. *Environ*  
554 *Res*. 2001;86(3):244-253. doi:10.1006/enrs.2001.4269
- 555 10. Oberdorster G, Ferin J, Lehnert BE. Correlation between particle size, in vivo particle  
556 persistence, and lung injury. In: *Environmental Health Perspectives*. ; 1994.
- 557 11. Stone V, Tuinman M, Vamvakopoulos JE, et al. Increased calcium influx in a monocytic  
558 cell line on exposure to ultrafine carbon black. *Eur Respir J*. 2000;15(2):297-303.

- 559 12. Li N, Sioutas C, Cho A, et al. Ultrafine particulate pollutants induce oxidative stress and  
560 mitochondrial damage. *Environ Health Perspect.* 2003;111(4):455-460.  
561 doi:10.1289/ehp.6000
- 562 13. Donaldson K. Ultrafine particles. *Occup Environ Med.* 2001;58(3):211-216.  
563 doi:10.1136/oem.58.3.211
- 564 14. Brown DM, Wilson MR, MacNee W, Stone V, Donaldson K. Size-dependent  
565 proinflammatory effects of ultrafine polystyrene particles: A role for surface area and  
566 oxidative stress in the enhanced activity of ultrafines. *Toxicol Appl Pharmacol.*  
567 2001;175(3):191-199. doi:10.1006/taap.2001.9240
- 568 15. US EPA. Overview of the Clean Air Act and Air Pollution. *U S Environ Prot Agency US*  
569 *EPA*. Published online 2020. <https://www.epa.gov/clean-air-act-overview>
- 570 16. Li HZ, Gu P, Ye Q, et al. Spatially dense air pollutant sampling: Implications of spatial  
571 variability on the representativeness of stationary air pollutant monitors. *Atmospheric*  
572 *Environ X.* 2019;2:100012. doi:<https://doi.org/10.1016/j.aeaoa.2019.100012>
- 573 17. US Census. TIGER/Line Shapefile, 2017, 2010 nation, U.S., 2010 Census Urban Area  
574 National. Published online 2021. Accessed April 29, 2021.  
575 [https://catalog.data.gov/dataset/tiger-line-shapefile-2017-2010-nation-u-s-2010-census-](https://catalog.data.gov/dataset/tiger-line-shapefile-2017-2010-nation-u-s-2010-census-urban-area-national)  
576 [urban-area-national](https://catalog.data.gov/dataset/tiger-line-shapefile-2017-2010-nation-u-s-2010-census-urban-area-national)
- 577 18. US EPA. *AirData Pre-Generated Data Files.*; 2019. Accessed December 7, 2019.  
578 [https://aqs.epa.gov/aqsweb/airdata/download\\_files.html](https://aqs.epa.gov/aqsweb/airdata/download_files.html)
- 579 19. Apte JS, Messier KP, Gani S, et al. High-Resolution Air Pollution Mapping with Google  
580 Street View Cars: Exploiting Big Data. *Environ Sci Technol.* 2017;51(12):6999-7008.  
581 doi:10.1021/acs.est.7b00891
- 582 20. Hatzopoulou M, Valois MF, Levy I, et al. Robustness of Land-Use Regression Models  
583 Developed from Mobile Air Pollutant Measurements. *Environ Sci Technol.*  
584 2017;51(7):3938-3947. doi:10.1021/acs.est.7b00366
- 585 21. Kerckhoffs J, Hoek G, Messier KP, et al. Comparison of ultrafine particle and black carbon  
586 concentration predictions from a mobile and short-term stationary land-use regression  
587 model. *Environ Sci Technol.* 2016;50(23):12894-12902. doi:10.1021/acs.est.6b03476
- 588 22. Patton AP, Perkins J, Zamore W, Levy JI, Brugge D, Durant JL. Spatial and temporal  
589 differences in traffic-related air pollution in three urban neighborhoods near an interstate  
590 highway. *Atmos Environ.* Published online 2014. doi:10.1016/j.atmosenv.2014.09.072
- 591 23. Van den Bossche J, Peters J, Verwaeren J, Botteldooren D, Theunis J, De Baets B. Mobile  
592 monitoring for mapping spatial variation in urban air quality: Development and validation  
593 of a methodology based on an extensive dataset. *Atmos Environ.* Published online 2015.  
594 doi:10.1016/j.atmosenv.2015.01.017

- 595 24. Whitby KT, Clark WE, Marple VA, et al. Characterization of California aerosols—I. Size  
596 distributions of freeway aerosol. *Atmospheric Environ* 1967. 1975;9(5):463-482.  
597 doi:10.1016/0004-6981(75)90107-9
- 598 25. Xie X, Semanjski I, Gautama S, et al. A Review of Urban Air Pollution Monitoring and  
599 Exposure Assessment Methods. *ISPRS Int J Geo-Inf*. 2017;6(12). doi:10.3390/ijgi6120389
- 600 26. Klompmaker JO, Montagne DR, Meliefste K, Hoek G, Brunekreef B. Spatial variation of  
601 ultrafine particles and black carbon in two cities: Results from a short-term measurement  
602 campaign. *Sci Total Environ*. 2015;508:266-275. doi:10.1016/j.scitotenv.2014.11.088
- 603 27. Montagne DR, Hoek G, Klompmaker JO, Wang M, Meliefste K, Brunekreef B. Land Use  
604 Regression Models for Ultrafine Particles and Black Carbon Based on Short-Term  
605 Monitoring Predict Past Spatial Variation. *Environ Sci Technol*. 2015;49(14):8712-8720.  
606 doi:10.1021/es505791g
- 607 28. Riley EA, Banks L, Fintzi J, et al. Multi-pollutant mobile platform measurements of air  
608 pollutants adjacent to a major roadway. *Atmos Environ*. 2014;98:492-499.  
609 doi:10.1016/j.atmosenv.2014.09.018
- 610 29. Blanco MN, Doubleday A, Austin E, et al. Design and evaluation of mobile monitoring  
611 campaigns for air pollution exposure assessment in epidemiologic cohorts. *medRxiv*.  
612 Published online January 1, 2021:2021.04.21.21255641.  
613 doi:10.1101/2021.04.21.21255641
- 614 30. Alexeeff SE, Roy A, Shan J, et al. High-resolution mapping of traffic related air pollution  
615 with Google street view cars and incidence of cardiovascular events within neighborhoods  
616 in Oakland, CA. *Environ Health*. 2018;17(38):1-13.
- 617 31. Kukull WA, Higdon R, Bowen JD, et al. Dementia and Alzheimer disease incidence: A  
618 prospective cohort study. *Arch Neurol*. 2002;59(11):1737-1746.  
619 doi:10.1001/archneur.59.11.1737
- 620 32. Esri. *ArcGIS Desktop*. Esri; 2019.  
621 [https://www.esri.com/about/newsroom/overview/?rmedium=NewsFallback&rsource=blog](https://www.esri.com/about/newsroom/overview/?rmedium=NewsFallback&rsource=blogs.esri.com/Support/blogs/mappingcenter/archive/2010/12/03/using-and-citing-esri-data.aspx)  
622 [s.esri.com/Support/blogs/mappingcenter/archive/2010/12/03/using-and-citing-esri-](https://www.esri.com/Support/blogs/mappingcenter/archive/2010/12/03/using-and-citing-esri-data.aspx)  
623 [data.aspx](https://www.esri.com/Support/blogs/mappingcenter/archive/2010/12/03/using-and-citing-esri-data.aspx)
- 624 33. Szpiro AA, Paciorek CJ. Measurement error in two-stage analyses, with application to air  
625 pollution epidemiology. *Environmetrics*. Published online 2013. doi:10.1002/env.2233
- 626 34. Google. *Google Maps*. Google Inc.; 2019. <https://www.maps.google.com>
- 627 35. Kwon HS, Ryu MH, Carlsten C. Ultrafine particles: unique physicochemical properties  
628 relevant to health and disease. *Exp Mol Med*. 2020;52(3):318-328. doi:10.1038/s12276-  
629 020-0405-1

- 630 36. R Core Team. R: A Language and Environment for Statistical Computing. R Foundation for  
631 Statistical Computing. Published 2019. <https://www.r-project.org>
- 632 37. PSCAA. *Air Quality Data. Puget Sound Clean Air Agency (PSCAA).*; 2020. Accessed April  
633 6, 2020. <https://pscleanair.gov/154/Air-Quality-Data>
- 634 38. Pebesma E, Graeler B. *Gstat: Spatial and Spatio-Temporal Geostatistical Modelling,*  
635 *Prediction and Simulation.*; 2021. <https://CRAN.R-project.org/package=gstat>
- 636 39. Bi J, Carmona N, Blanco MN, et al. Publicly available low-cost sensor measurements for  
637 PM2.5 exposure modeling: Guidance for monitor deployment and data selection. *Environ*  
638 *Int.* 2021;158:106897. doi:10.1016/j.envint.2021.106897
- 639 40. Roberts DR, Bahn V, Ciuti S, et al. Cross-validation strategies for data with temporal,  
640 spatial, hierarchical, or phylogenetic structure. *Ecography.* 2017;40(8):913-929.  
641 doi:10.1111/ecog.02881
- 642 41. Kerckhoffs J, Hoek G, Portengen L, Brunekreef B, Vermeulen RCH. Performance of  
643 Prediction Algorithms for Modeling Outdoor Air Pollution Spatial Surfaces. *Environ Sci*  
644 *Technol.* 2019;53(3):1413-1421. doi:10.1021/acs.est.8b06038
- 645 42. Kerckhoffs J, Hoek G, Gehring U, Vermeulen R. Modelling nationwide spatial variation of  
646 ultrafine particles based on mobile monitoring. *Environ Int.* 2021;154:106569.  
647 doi:10.1016/j.envint.2021.106569
- 648 43. Minet L, Liu R, Valois MF, Xu J, Weichenthal S, Hatzopoulou M. Development and  
649 Comparison of Air Pollution Exposure Surfaces Derived from On-Road Mobile  
650 Monitoring and Short-Term Stationary Sidewalk Measurements. *Environ Sci Technol.*  
651 2018;52(6):3512-3519. doi:10.1021/acs.est.7b05059
- 652 44. Simon MC, Hudda N, Naumova EN, Levy JI, Brugge D, Durant JL. Comparisons of  
653 Traffic-Related Ultrafine Particle Number Concentrations Measured in Two Urban Areas  
654 by Central, Residential, and Mobile Monitoring. *Atmospheric Environ Oxf Engl 1994.*  
655 2017;169:113-127. doi:10.1016/j.atmosenv.2017.09.003
- 656 45. Saha PK, Li HZ, Apte JS, Robinson AL, Presto AA. Urban Ultrafine Particle Exposure  
657 Assessment with Land-Use Regression: Influence of Sampling Strategy. *Environ Sci*  
658 *Technol.* 2019;53:7326-7336. doi:10.1021/acs.est.9b02086
- 659 46. Levy I, Mihele C, Lu G, Narayan J, Brook JR. Evaluating multipollutant exposure and  
660 urban air quality: pollutant interrelationships, neighborhood variability, and nitrogen  
661 dioxide as a proxy pollutant. *Environ Health Perspect.* 2014;122(1):65-72.
- 662 47. Levy I, Mihele C, Lu G, Narayan J, Hilker N, Brook JR. Elucidating multipollutant  
663 exposure across a complex metropolitan area by systematic deployment of a mobile  
664 laboratory. *Atmospheric Chem Phys.* Published online 2014. doi:10.5194/acp-14-7173-  
665 2014

- 666 48. US EPA. NAAQS Table. *U S Environ Prot Agency US EPA*. Published online February 10,  
667 2021. Accessed July 7, 2021. <https://www.epa.gov/criteria-air-pollutants/naaqs-table>
- 668 49. Abernethy RC, Allen RW, McKendry IG, Brauer M. A land use regression model for  
669 ultrafine particles in Vancouver, Canada. *Environ Sci Technol*. 2013;47(10):5217-5225.
- 670 50. Farrell W, Weichenthal S, Goldberg M, Valois MF, Shekarrizfard M, Hatzopoulou M. Near  
671 roadway air pollution across a spatially extensive road and cycling network. *Environ*  
672 *Pollut*. 2016;212:498-507. doi:<https://doi.org/10.1016/j.envpol.2016.02.041>
- 673 51. Hankey S, Marshall JD. On-bicycle exposure to particulate air pollution: Particle number,  
674 black carbon, PM<sub>2.5</sub>, and particle size. *Atmos Environ*. 2015;122:65-73.  
675 doi:10.1016/j.atmosenv.2015.09.025
- 676 52. Kerckhoffs J, Hoek G, Vlaanderen J, et al. Robustness of intra urban land-use regression  
677 models for ultrafine particles and black carbon based on mobile monitoring. *Environ Res*.  
678 2017;159(May):500-508. doi:10.1016/j.envres.2017.08.040
- 679 53. Montagne DR, Hoek G, Klomp maker JO, Wang M, Meliefste K, Brunekreef B. Land Use  
680 Regression Models for Ultrafine Particles and Black Carbon Based on Short-Term  
681 Monitoring Predict Past Spatial Variation. *Environ Sci Technol*. 2015;49(14):8712-8720.  
682 doi:10.1021/es505791g
- 683 54. Patton AP, Zamore W, Naumova EN, Levy JI, Brugge D, Durant JL. Transferability and  
684 generalizability of regression models of ultrafine particles in urban neighborhoods in the  
685 boston area. *Environ Sci Technol*. 2015;49(10):6051-6060. doi:10.1021/es5061676
- 686 55. Ragettli MS, Ducret-Stich RE, Foraster M, et al. Spatio-temporal variation of urban  
687 ultrafine particle number concentrations. *Atmos Environ*. 2014;96:275-283.  
688 doi:10.1016/j.atmosenv.2014.07.049
- 689 56. Rivera M, Basagaña X, Aguilera I, et al. Spatial distribution of ultrafine particles in urban  
690 settings: A land use regression model. *Atmos Environ*. 2012;54:657-666.  
691 doi:10.1016/j.atmosenv.2012.01.058
- 692 57. Saha PK, Zimmerman N, Malings C, et al. Quantifying high-resolution spatial variations  
693 and local source impacts of urban ultrafine particle concentrations. *Sci Total Environ*.  
694 2019;655:473-481. doi:<https://doi.org/10.1016/j.scitotenv.2018.11.197>
- 695 58. Saraswat A, Apte JS, Kandlikar M, Brauer M, Henderson SB, Marshall JD. Spatiotemporal  
696 land use regression models of fine, ultrafine, and black carbon particulate matter in New  
697 Delhi, India. *Environ Sci Technol*. 2013;47(22):12903-12911. doi:10.1021/es401489h
- 698 59. Simon MC, Patton AP, Naumova EN, et al. Combining Measurements from Mobile  
699 Monitoring and a Reference Site to Develop Models of Ambient Ultrafine Particle  
700 Number Concentration at Residences. *Environ Sci Technol*. 2018;52(12):6985-6995.  
701 doi:10.1021/acs.est.8b00292



- 702 60. van Nunen E, Vermeulen R, Tsai MY, et al. Land use regression models for ultrafine  
703 particles in six European areas. *Environ Sci Technol*. 2017;51(6):3336-3345.
- 704 61. Weichenthal S, Ryswyk K Van, Goldstein A, Bagg S, Shekharizfard M, Hatzopoulou M. A  
705 land use regression model for ambient ultrafine particles in Montreal, Canada: A  
706 comparison of linear regression and a machine learning approach. *Environ Res*.  
707 2016;146:65-72. doi:10.1016/j.envres.2015.12.016
- 708 62. Weichenthal S, Van Ryswyk K, Goldstein A, Shekarrizfard M, Hatzopoulou M.  
709 Characterizing the spatial distribution of ambient ultrafine particles in Toronto, Canada: A  
710 land use regression model. *Environ Pollut*. Published online 2016.  
711 doi:10.1016/j.envpol.2015.04.011
- 712 63. Yu CH, Fan Z, Liyo PJ, Baptista A, Greenberg M, Laumbach RJ. A novel mobile  
713 monitoring approach to characterize spatial and temporal variation in traffic-related air  
714 pollutants in an urban community. *Atmos Environ*. 2016;141:161-173.  
715 doi:10.1016/j.atmosenv.2016.06.044
- 716 64. Beelen R, Hoek G, Fischer P, van den Brandt PA, Brunekreef B. Estimated long-term  
717 outdoor air pollution concentrations in a cohort study. *Atmospheric Environ 1994*.  
718 2007;41(26):1343-1358.
- 719 65. Brauer M, Hoek G, Vliet P van, et al. Estimating Long-Term Average Particulate Air  
720 Pollution Concentrations: Application of Traffic Indicators and Geographic Information  
721 Systems. *Epidemiol Camb Mass*. 2003;14(2):228-239.  
722 doi:10.1097/01.EDE.0000041910.49046.9B
- 723 66. Carr D, von Ehrenstein O, Weiland S, et al. Modeling annual benzene, toluene, NO<sub>2</sub>, and  
724 soot concentrations on the basis of road traffic characteristics. *Environ Res*.  
725 2002;90(2):111-118. doi:10.1006/enrs.2002.4393
- 726 67. Dodson RE, Houseman EA, Morin B, Levy JI. An analysis of continuous black carbon  
727 concentrations in proximity to an airport and major roadways. *Atmos Environ*.  
728 2009;43(24):3764-3773.
- 729 68. Hankey S, Marshall JD. Land Use Regression Models of On-Road Particulate Air Pollution  
730 (Particle Number, Black Carbon, PM<sub>2.5</sub>, Particle Size) Using Mobile Monitoring. *Environ  
731 Sci Technol*. 2015;49(15):9194-9202. doi:10.1021/acs.est.5b01209
- 732 69. Henderson SB, Beckerman B, Jerrett M, Brauer M. Application of Land Use Regression to  
733 Estimate Long-Term Concentrations of Traffic-Related Nitrogen Oxides and Fine  
734 Particulate Matter. *Environ Sci Technol*. 2007;41(7):2422-2428. doi:10.1021/es0606780
- 735 70. Hochadel M, Heinrich J, Gehring U, et al. Predicting long-term average concentrations of  
736 traffic-related air pollutants using GIS-based information. *Atmospheric Environ 1994*.  
737 2006;40(3):542-553. doi:10.1016/j.atmosenv.2005.09.067

- 738 71. Larson T, Su J, Baribeau AM, Buzzelli M, Setton E, Brauer M. A spatial model of urban  
739 winter woodsmoke concentrations. *Environ Sci Technol*. 2007;41(7):2429-2436.
- 740 72. Larson T, Henderson SB, Brauer M. Mobile monitoring of particle light absorption  
741 coefficient in an urban area as a basis for land use regression. *Environ Sci Technol*.  
742 2009;43(13):4672-4678. doi:10.1021/es803068e
- 743 73. Morgenstern V, Zutavern A, Cyrus J, et al. Respiratory health and individual estimated  
744 exposure to traffic-related air pollutants in a cohort of young children. *Occup Environ*  
745 *Med*. 2007;64(1):8-16. doi:10.1136/oem.2006.028241
- 746 74. Ryan PH, LeMasters GK, Biswas P, et al. A Comparison of Proximity and Land Use  
747 Regression Traffic Exposure Models and Wheezing in Infants. *Environ Health Perspect*.  
748 2007;115(2):278-284. doi:10.1289/ehp.9480
- 749 75. Su JG, Allen G, Miller PJ, Brauer M. Spatial modeling of residential woodsmoke across a  
750 non-urban upstate New York region. *Air Qual Atmosphere Health*. 2013;6(1):85-94.  
751 doi:10.1007/s11869-011-0148-1
- 752 76. NOAA. NOAA Climate.gov. *Natl Ocean Atmospheric Adm NOAA*. Published online 2021.  
753 Accessed July 7, 2021. <https://www.climate.gov>
- 754 77. Moran D, Kanemoto K, Jiborn M, Wood R, Többen J, Seto KC. Carbon footprints of  
755 13□000 cities. *Environ Res Lett*. 2018;13(6):064041. doi:10.1088/1748-9326/aac72a
- 756 78. Moran D, Kanemoto K, Wood R, Tobben J, Seto K. Global Gridded Model of Carbon  
757 Footprints (GGMCF). Published 2021. Accessed July 7, 2021.  
758 <http://citycarbonfootprints.info>
- 759 79. Hoek G, Beelen R, de Hoogh K, et al. A review of land-use regression models to assess  
760 spatial variation of outdoor air pollution. *Atmos Environ*. 2008;42(33):7561-7578.  
761 doi:10.1016/j.atmosenv.2008.05.057
- 762 80. Billionnet C, Sherrill D, Annesi-Maesano I. Estimating the Health Effects of Exposure to  
763 Multi-Pollutant Mixture. *Ann Epidemiol*. 2012;22(2):126-141.  
764 doi:10.1016/j.annepidem.2011.11.004
- 765 81. Dominici F, Peng RD, Barr CD, Bell ML. Protecting human health from air pollution:  
766 shifting from a single-pollutant to a multipollutant approach. *Epidemiol Camb Mass*.  
767 2010;21(2):187-194. doi:10.1097/EDE.0b013e3181cc86e8
- 768 82. Oakes M, Baxter L, Long TC. Evaluating the application of multipollutant exposure metrics  
769 in air pollution health studies. *Environ Int*. 2014;69:90-99.  
770 doi:10.1016/j.envint.2014.03.030
- 771 83. Stafoggia M, Breitner S, Hampel R, Basagaña X. Statistical Approaches to Address Multi-  
772 Pollutant Mixtures and Multiple Exposures: the State of the Science. *Curr Environ Health*  
773 *Rep*. 2017;4(4):481-490. doi:10.1007/s40572-017-0162-z

- 774 84. US EPA. Integrated science assessment (ISA) for particulate matter (final report, Dec  
775 2019). *US Environ Prot Agency*. Published online 2019.  
776 <https://cfpub.epa.gov/ncea/isa/recordisplay.cfm?deid=347534>
- 777 85. Saha PK, Li HZ, Apte JS, Robinson AL, Presto AA. Urban Ultrafine Particle Exposure  
778 Assessment with Land-Use Regression: Influence of Sampling Strategy. *Environ Sci*  
779 *Technol*. 2019;53:7326-7336. doi:10.1021/acs.est.9b02086
- 780 86. Sabaliauskas K, Jeong CH, Yao X, Reali C, Sun T, Evans GJ. Development of a land-use  
781 regression model for ultrafine particles in Toronto, Canada. *Atmos Environ*. 2015;110:84-  
782 92. doi:10.1016/j.atmosenv.2015.02.018
- 783 87. Beelen R, Hoek G, Vienneau D, et al. Development of NO<sub>2</sub> and NO<sub>x</sub> land use regression  
784 models for estimating air pollution exposure in 36 study areas in Europe – The ESCAPE  
785 project. *Atmospheric Environ* 1994. 2013;72:10-23. doi:10.1016/j.atmosenv.2013.02.037
- 786 88. Wolf K, Cyrys J, Harciníková T, et al. Land use regression modeling of ultrafine particles,  
787 ozone, nitrogen oxides and markers of particulate matter pollution in Augsburg, Germany.  
788 *Sci Total Environ*. 2017;579:1531-1540. doi:10.1016/j.scitotenv.2016.11.160
- 789 89. Cattani G, Gaeta A, Di Menno di Bucchianico A, et al. Development of land-use regression  
790 models for exposure assessment to ultrafine particles in Rome, Italy. *Atmos Environ*.  
791 2017;156:52-60. doi:<https://doi.org/10.1016/j.atmosenv.2017.02.028>
- 792 90. Hoek G, Beelen R, Kos G, et al. Land Use Regression Model for Ultrafine Particles in  
793 Amsterdam. *Environ Sci Technol*. 2011;45(2):622-628. doi:10.1021/es1023042
- 794 91. Saha PK, Hankey S, Marshall JD, Robinson AL, Presto AA. High-Spatial-Resolution  
795 Estimates of Ultrafine Particle Concentrations across the Continental United States.  
796 *Environ Sci Technol*. Published online July 21, 2021. doi:10.1021/acs.est.1c03237
- 797 92. Eeftens M, Meier R, Schindler C, et al. Development of land use regression models for  
798 nitrogen dioxide, ultrafine particles, lung deposited surface area, and four other markers of  
799 particulate matter pollution in the Swiss SAPALDIA regions. *Environ Health Glob Access*  
800 *Sci Source*. 2016;15(1):1-14. doi:10.1186/s12940-016-0137-9

801
