# Supplementary material for: Characterization of annual average traffic-related air pollution levels (particle number, black carbon, nitrogen dioxide, PM2.5, carbon dioxide) in the greater Seattle area from a year-long mobile monitoring campaign
Source: bioRxiv or medRxiv preprint supplement (doi:10.1101/2021.09.18.21263522), 2022-02-14
Supplement: Supplementary file [file media-1.pdf]

## Supplementary Information

### **Mobile monitoring of traffic-related air pollution for a prospective cohort study in the greater Seattle area**

Magali N. Blanco,<sup>a</sup> Amanda Gassett,<sup>a</sup> Timothy Gould,<sup>b</sup> Annie Doubleday,<sup>a</sup> David L. Slager,<sup>a</sup>  
Elena Austin,<sup>a</sup> Edmund Seto,<sup>a</sup> Timothy Larson,<sup>a,b</sup> Julian Marshall,<sup>b</sup> Lianne Sheppard<sup>a,c</sup>

<sup>a</sup>Department of Environmental and Occupational Health Sciences, School of Public Health,  
University of Washington, Hans Rosling Center for Population Health, 3980 15th Ave NE,  
Seattle, WA 98195

<sup>b</sup>Department of Civil & Environmental Engineering, College of Engineering, University of  
Washington, 201 More Hall, Box 352700, Seattle, WA 98195

<sup>c</sup>Department of Biostatistics, School of Public Health, University of Washington, Hans Rosling  
Center for Population Health, 3980 15th Ave NE, Seattle, WA 98195

## Table of Contents

|          |                                                  |           |
|----------|--------------------------------------------------|-----------|
| <b>1</b> | <b>METHODS</b> .....                             | <b>1</b>  |
| 1.1      | STUDY DESIGN .....                               | 1         |
| 1.2      | QUALITY ASSURANCE AND QUALITY CONTROL .....      | 8         |
| 1.3      | COMPUTATION .....                                | 15        |
| <b>2</b> | <b>RESULTS</b> .....                             | <b>16</b> |
| 2.1      | DATA COLLECTED .....                             | 16        |
| 2.2      | SITE VISITS .....                                | 19        |
| 2.3      | ANNUAL AVERAGES .....                            | 27        |
| 2.4      | COLLOCATIONS AT REGULATORY MONITORING SITES..... | 37        |
| <b>3</b> | <b>REFERENCES</b> .....                          | <b>39</b> |

## List of Tables

|            |                                                                                                                                         |    |
|------------|-----------------------------------------------------------------------------------------------------------------------------------------|----|
| TABLE S1.  | ROUTE STATISTICS. ....                                                                                                                  | 3  |
| TABLE S2.  | AIR POLLUTANTS AND OTHER PARAMETERS MEASURED WITH MOBILE MONITORING. ....                                                               | 5  |
| TABLE S3.  | DISTRIBUTION OF CALIBRATION CURVE COEFFICIENT ESTIMATES.....                                                                            | 10 |
| TABLE S4.  | DISTRIBUTION OF TEMPERATURE AND RELATIVE HUMIDITY CONDITIONS INSIDE THE MANIFOLD DURING SITE VISITS (N=9,047 TOTAL). <sup>A</sup> ..... | 14 |
| TABLE S5.  | COLLOCATION REGULATORY SITES AND SIMILAR PARAMETERS MEASURED. <sup>A</sup> .....                                                        | 14 |
| TABLE S6.  | DISTRIBUTION OF SITE VISIT POLLUTANT CONCENTRATIONS (N = 309 SITES X ~ 29 VISITS/SITE).....                                             | 17 |
| TABLE S7.  | ORIGINAL AND FINAL MOBILE MONITORING STOP MEASUREMENTS (~2 MIN EACH). ....                                                              | 18 |
| TABLE S8.  | COMPARISON OF WITHIN- AND BETWEEN- SITE VARIABILITY. ....                                                                               | 21 |
| TABLE S9.  | PERCENT (%) OF VARIABILITY IN VISIT CONCENTRATIONS EXPLAINED BY SPATIAL AND TEMPORAL FACTORS. <sup>A</sup> .....                        | 26 |
| TABLE S10. | AVAILABLE GEOGRAPHIC COVARIATES (GEOCOVARIATES) AT MONITORING AND COHORT LOCATIONS. ...                                                 | 30 |

## List of Figures

|            |                                                                                                                                                                                                                                                                                                                                                                                                                                                                                                                                                            |    |
|------------|------------------------------------------------------------------------------------------------------------------------------------------------------------------------------------------------------------------------------------------------------------------------------------------------------------------------------------------------------------------------------------------------------------------------------------------------------------------------------------------------------------------------------------------------------------|----|
| FIGURE S1. | COVARIATE DISTRIBUTIONS OF MOBILE MONITORING ROAD SEGMENTS (N=6,786 100 M SEGMENTS) AND ACT COHORT LOCATIONS (N=10,330). NOTE THAT FIGURE 2 IN THE MAIN TEXT SHOWS THE DISTRIBUTION OF STOP MONITORING LOCATIONS RATHER THAN ROAD SEGMENTS. ....                                                                                                                                                                                                                                                                                                           | 2  |
| FIGURE S2. | MEAN PERCENT ERROR ( $(\text{ESTIMATED\_CONC} - \text{TRUE\_CONC})/\text{TRUE\_CONC} * 100$ ) IN THE ESTIMATED NITROGEN MONOXIDE (NO) ANNUAL AVERAGE AT THE 10 <sup>TH</sup> & WELLER (AQS10W; NEAR-ROAD SITE) AND BEACON HILL (AQSBH; BACKGROUND SITE) REGULATORY SITES FROM REPEATED SHORT-TERM RANDOM SAMPLES (2- AND 60-MIN), WHEN COMPARED TO THE “TRUE” ANNUAL AVERAGE ESTIMATED FROM ALL THE AVAILABLE 2019 DATA. ESTIMATES ARE FOR 10,000 SIMULATIONS OF RANDOM SAMPLING WITHOUT REPLACEMENT. THE BLUE VERTICAL LINE IS FOR 25 REPEAT VISITS. .... | 4  |
| FIGURE S3. | IN-VEHICLE CONFIGURATION.....                                                                                                                                                                                                                                                                                                                                                                                                                                                                                                                              | 7  |
| FIGURE S4. | MANIFOLD SCHEMATICS.....                                                                                                                                                                                                                                                                                                                                                                                                                                                                                                                                   | 7  |
| FIGURE S5. | PARTICLE INSTRUMENT RESPONSES TO FILTERED AIR (NEAR 0 PT/CM <sup>3</sup> ). DOTS SHOW MEDIAN, TWO-MINUTE INSTRUMENT READINGS. RED LINES ARE “LOW” AMBIENT CONCENTRATION REFERENCES, BASED ON THE 5 <sup>TH</sup> QUANTILE OF STOP CONCENTRATIONS FOR EACH POLLUTANT. RESPONSES FOR PRIMARY INSTRUMENTS ARE BASED ON MORE INSTRUMENT CHECKS (DATA) THROUGHOUT THE STUDY PERIOD. ....                                                                                                                                                                        | 12 |

|                                                                                                                                                                                                                                                                                                                                                                                                                                                                                                                                                                                                                                                                                                                                                                                                                                 |    |
|---------------------------------------------------------------------------------------------------------------------------------------------------------------------------------------------------------------------------------------------------------------------------------------------------------------------------------------------------------------------------------------------------------------------------------------------------------------------------------------------------------------------------------------------------------------------------------------------------------------------------------------------------------------------------------------------------------------------------------------------------------------------------------------------------------------------------------|----|
| FIGURE S6. COMPARISON OF TWO-MINUTE MEDIAN STOP CONCENTRATIONS FROM INSTRUMENT COLLOCATIONS. GAS VALUES ARE POST CALIBRATION. UFP INSTRUMENTS REPORT NUMBER CONCENTRATIONS: PARTICLES (PT) PER CM <sup>3</sup> .                                                                                                                                                                                                                                                                                                                                                                                                                                                                                                                                                                                                                | 13 |
| FIGURE S7. NUMBER OF SITE VISITS PER TIME PERIOD. SHOWING UFP DATA, THOUGH ALL INSTRUMENTS WERE SIMILAR.                                                                                                                                                                                                                                                                                                                                                                                                                                                                                                                                                                                                                                                                                                                        | 16 |
| FIGURE S8. INTERQUARTILE RANGE (IQR) OF SITE VISIT CONCENTRATIONS FOR BC, CO <sub>2</sub> , NO <sub>2</sub> AND PM <sub>2.5</sub> (N~29 VISITS PER SITE).                                                                                                                                                                                                                                                                                                                                                                                                                                                                                                                                                                                                                                                                       | 19 |
| FIGURE S9. INTERQUARTILE RANGE (IQR) OF SITE OF VISIT CONCENTRATIONS (N~29 VISITS PER SITE) FOR UFP MEASURES WITH DIFFERENT INSTRUMENTS AND PARTICLE SIZE RANGES (NM).                                                                                                                                                                                                                                                                                                                                                                                                                                                                                                                                                                                                                                                          | 20 |
| FIGURE S10. MEDIAN SITE VISIT CONCENTRATIONS BY SEASON. LINES CONNECT MEDIAN CONCENTRATIONS. BOXES SHOW THE 25 <sup>TH</sup> , 50 <sup>TH</sup> AND 75 <sup>TH</sup> QUANTILE; WHISKERS SHOW THE 5 <sup>TH</sup> AND 95 <sup>TH</sup> QUANTILES.                                                                                                                                                                                                                                                                                                                                                                                                                                                                                                                                                                                | 22 |
| FIGURE S11. MEDIAN SITE VISIT CONCENTRATIONS BY DAY OF THE WEEK. LINES CONNECT MEDIAN CONCENTRATIONS. BOXES SHOW THE 25 <sup>TH</sup> , 50 <sup>TH</sup> AND 75 <sup>TH</sup> QUANTILE; WHISKERS SHOW THE 5 <sup>TH</sup> AND 95 <sup>TH</sup> QUANTILES.                                                                                                                                                                                                                                                                                                                                                                                                                                                                                                                                                                       | 23 |
| FIGURE S12. MEDIAN SITE VISIT CONCENTRATIONS BY HOUR OF THE DAY. LINES CONNECT MEDIAN CONCENTRATIONS. BOXES SHOW THE 25 <sup>TH</sup> , 50 <sup>TH</sup> AND 75 <sup>TH</sup> QUANTILE; WHISKERS SHOW THE 5 <sup>TH</sup> AND 95 <sup>TH</sup> QUANTILES.                                                                                                                                                                                                                                                                                                                                                                                                                                                                                                                                                                       | 24 |
| FIGURE S13. SITE-SPECIFIC POLLUTANT CONCENTRATIONS OVER THE COURSE OF THE STUDY. THIN LINES SHOW SITE-SPECIFIC SMOOTH (LOESS) FITS FOR MEDIAN VISIT CONCENTRATIONS (N~29 VISITS/SITE). BLACK LINES SHOW THE OVERALL SMOOTH TRENDS FOR ALL OF THE SITES.                                                                                                                                                                                                                                                                                                                                                                                                                                                                                                                                                                         | 25 |
| FIGURE S14. ANNUAL AVERAGE SITE CONCENTRATIONS (N=309). BOXPLOTS ARE TRADITIONAL AND SHOW ALL OF THE SITE AVERAGES SUCH THAT BOXES SHOW THE 25 <sup>TH</sup> , 50 <sup>TH</sup> AND 75 <sup>TH</sup> QUANTILE (Q); WHISKERS SHOW A 1.5*(Q75-Q25) DISTANCE AWAY FROM THE 25 <sup>TH</sup> OR 75 <sup>TH</sup> QUANTILE, AND DOTS ARE OUTLIERS.                                                                                                                                                                                                                                                                                                                                                                                                                                                                                   | 27 |
| FIGURE S15. ANNUAL AVERAGE POLLUTANT CORRELATIONS (N=309 SITES). LOWER PANELS SHOW SCATTERPLOTS WITH LOESS LINES AND 95% CONFIDENCE INTERVALS; UPPER PANELS SHOW PEARSON CORRELATIONS (R), WITH HIGHER VALUES IN DARKER REDS; DIAGONAL PANELS SHOW DENSITY PLOTS.                                                                                                                                                                                                                                                                                                                                                                                                                                                                                                                                                               | 28 |
| FIGURE S16. ANNUAL AVERAGE TOTAL UFP CONCENTRATIONS AT MONITORING SITES (N=309) FOR DIFFERENT UFP MEASURES.                                                                                                                                                                                                                                                                                                                                                                                                                                                                                                                                                                                                                                                                                                                     | 29 |
| FIGURE S17. ANNUAL AVERAGE TOTAL SCALED AIR POLLUTION, DEFINED AT EACH SITE AS: $Sum\ of\ scores = i = 1n(xi, j - medianXi) / IQR(Xi)$ , WHERE X IS EACH INDIVIDUAL POLLUTANT (N=5) AND J INDEXES EACH INDIVIDUAL POLLUTANT MEASUREMENT. COLORS INDICATE WHERE AIR POLLUTION LEVELS WERE HIGHER OR LOWER THAN THE OVERALL AVERAGE (TOTAL SCALED AIR POLLUTION = 0). SHAPES INDICATE THE LEADING POLLUTANT (HIGHEST SCORE) AT EACH SITE. UFP LEVELS ARE FOR PARTICLES 20-1,000 NM (P-TRAK).                                                                                                                                                                                                                                                                                                                                      | 35 |
| FIGURE S18. LASSO REGRESSION COEFFICIENT ESTIMATES FOR ANNUAL AVERAGE POLLUTANT CONCENTRATIONS. COVARIATES WITHOUT BUFFER VALUES (SHOWN IN THE LEGEND AS "0" (M)) ARE FOR PROXIMITY AND ELEVATION VARIABLES RATHER THAN VALUES FOR A BUFFERED RADIUS. SHOWING THE TOP 10 COVARIATES WITH THE LARGEST COEFFICIENT ESTIMATES FOR EACH POLLUTANT. SEE SI TABLE S8 FOR COVARIATE DEFINITIONS.                                                                                                                                                                                                                                                                                                                                                                                                                                       | 36 |
| FIGURE S19. COMPARISON OF TWO-MINUTE MEDIAN CONCENTRATIONS FROM MOBILE MONITORING AND THE DEPARTMENT OF ECOLOGY (DOE) READINGS AT AIR QUALITY SYSTEM (AQS) COLLOCATION SITES. MOBILE MONITORING PM <sub>2.5</sub> CONCENTRATIONS ARE FROM CALIBRATED NEPHELOMETER READINGS (SEE METHODS). DOE PM <sub>2.5</sub> CONCENTRATIONS ARE FROM NEPHELOMETERS WHEN AVAILABLE (AQSD, AQSK, AQSTUK), OTHERWISE THEY ARE FROM GRAVIMETRIC AND BETA ATTENUATION (BAM) METHODS, WHICH ARE UPDATED LESS FREQUENTLY (AQSD, AQSK, AQSTUK – READINGS ARE BASED ON ROLLING 1-HOUR ESTIMATES UPDATED EVERY 6 MINUTES, AQSBH – READINGS ARE UPDATED HOURLY).                                                                                                                                                                                        | 37 |
| FIGURE S20. COMPARISON OF ANNUAL AVERAGE ESTIMATES FROM MOBILE MONITORING AND THE DEPARTMENT OF ECOLOGY (DOE) READINGS AT AIR QUALITY SYSTEM (AQS) COLLOCATION SITES. PLOTS COMPARE ESTIMATES USING MOBILE MONITORING STOP DATA, DOE DATA DURING THE SAME TWO-MINUTE TIME PERIODS, AND THE TRUE ANNUAL AVERAGES AT THOSE SITES USING ALL THE AVAILABLE REGULATORY MONITORING DATA FOR THE STUDY PERIOD. MOBILE MONITORING PM <sub>2.5</sub> CONCENTRATIONS ARE FROM CALIBRATED NEPHELOMETER READINGS (SEE METHODS). DOE PM <sub>2.5</sub> CONCENTRATIONS ARE FROM NEPHELOMETERS WHEN AVAILABLE (AQSD, AQSK, AQSTUK), OTHERWISE THEY ARE FROM GRAVIMETRIC AND BETA ATTENUATION (BAM) METHODS (AQSD, AQSK, AQSTUK – READINGS ARE BASED ON ROLLING 1-HOUR ESTIMATES UPDATED EVERY 6 MINUTES, AQSBH – READINGS ARE UPDATED HOURLY). | 38 |

## List of Equations

|                                                                                                  |    |
|--------------------------------------------------------------------------------------------------|----|
| EQUATION S1. NEPHELOMETER LIGHT SCATTERING (BSCAT) CALIBRATION CURVE FOR PM <sub>2.5</sub> ..... | 14 |
|--------------------------------------------------------------------------------------------------|----|

## List of Notes

|                                                                 |    |
|-----------------------------------------------------------------|----|
| NOTE S1. SELECTING THE MONITORING LOCATIONS .....               | 1  |
| NOTE S2. QUALITY ASSURANCE AND QUALITY CONTROL PROCEDURES ..... | 8  |
| NOTE S3. SOFTWARE USED IN ANALYSES. ....                        | 15 |



# 1 Methods

## 1.1 Study Design

*Note S1. Selecting the monitoring locations*

We used ArcMap to select 304 participant residences within our monitoring region that maximized spatial coverage. To do so, we first created a street network in ArcMap using Tiger/Line® shapefiles downloaded from the U.S. Census Bureau.<sup>1,2</sup> These include all roads within the monitoring area. We divided the monitoring area into nine regions and selected approximately 34 participant residences within each of these regions (~34 locations/region x 9 regions = 304 total locations). These locations were meant to maximize spatial coverage by minimizing the distance between each selected location and all of the nearby participant locations. The initially selected locations were jittered (using the *jitter* function in R [v 3.5.1, using RStudio v 1.0.143]) to maintain participant confidentiality, and 304 new, nearby locations were identified as monitoring locations. The resulting locations were shifted anywhere from roughly a couple of houses to several blocks over. Locations were manually moved to the nearest home if the jittering caused locations to end up in a lake, park, etc. We used Google Maps Street View<sup>3</sup> to ensure that a vehicle could safely park at each location, otherwise the stop was moved to the nearest location where it was safe to do so. We included 5 regulatory monitoring locations to obtain the final 309 monitoring locations.

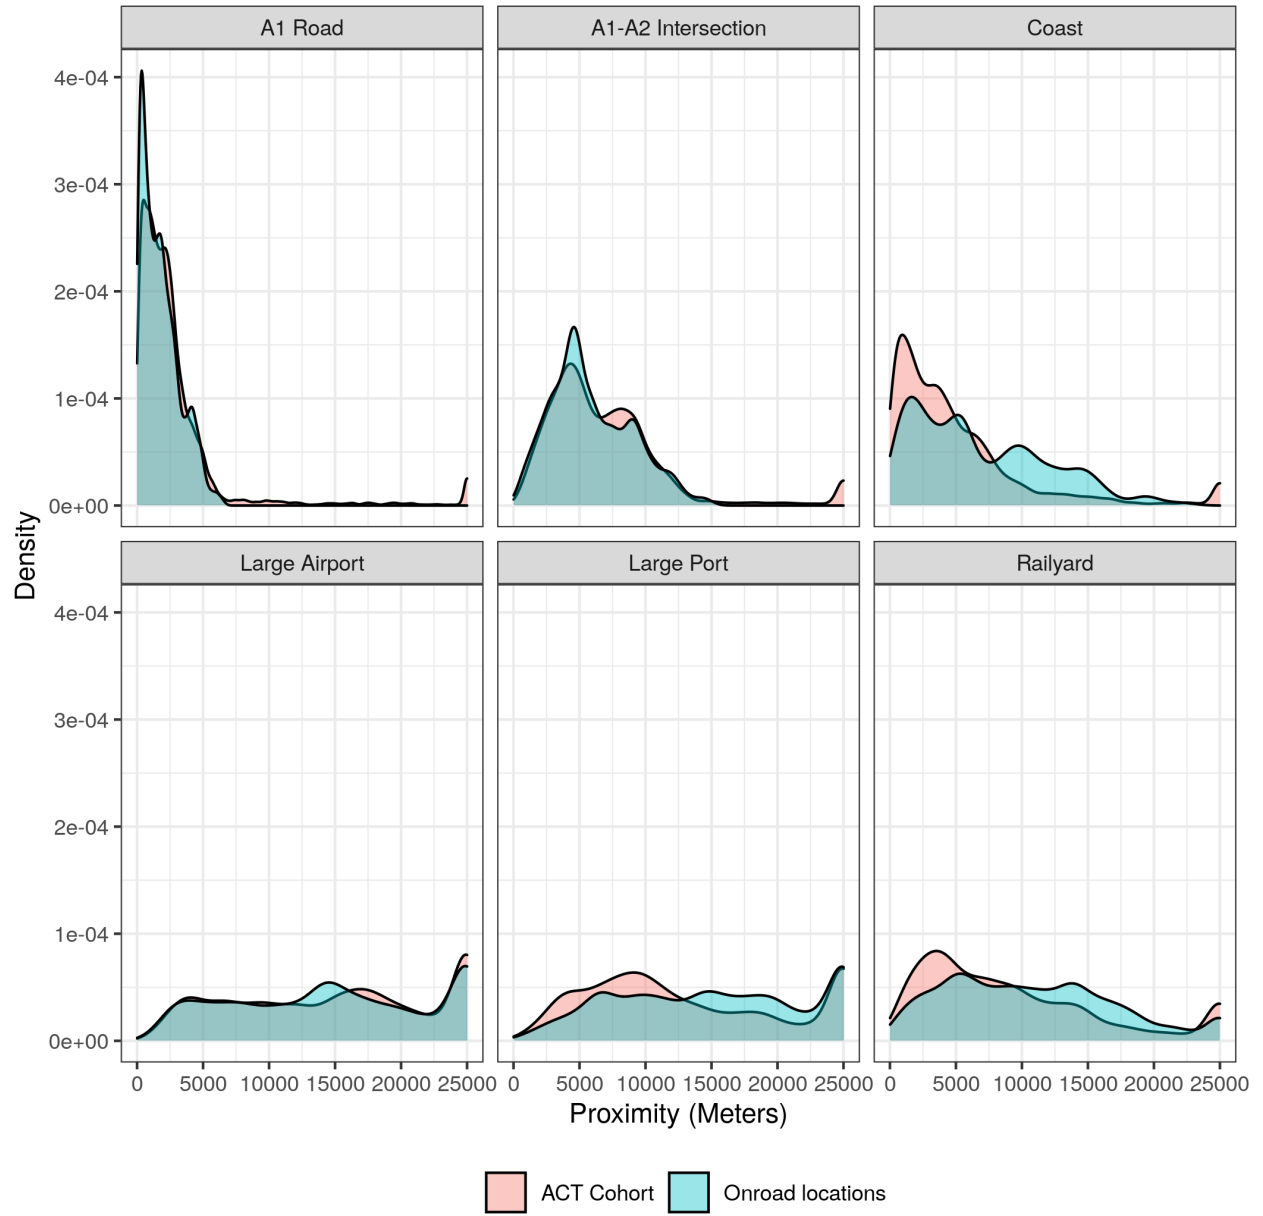

Figure S1. Covariate distributions of mobile monitoring road segments ( $n=6,786$  100 m segments) and ACT cohort locations ( $n=10,330$ ). Note that Figure 2 in the main text shows the distribution of stop monitoring locations rather than road segments.

Table S1. Route Statistics.

| Route <sup>a</sup> | No. Stops | No. Sampling Dates | Distance (mi) | Distance (km) | Total Distance (mi) <sup>b</sup> | Total Distance (km) | No. Road Segments <sup>c</sup> | Median (IQR) Drive Time (hr) | Total Drive Time (hr) |
|--------------------|-----------|--------------------|---------------|---------------|----------------------------------|---------------------|--------------------------------|------------------------------|-----------------------|
| 1                  | 40        | 30                 | 48            | 78            | 1,446                            | 2,328               | 578                            | 5.2 (4.8, 5.7)               | 153                   |
| 2                  | 35        | 30                 | 47            | 75            | 1,397                            | 2,247               | 517                            | 4.8 (4.4, 5.1)               | 140                   |
| 3                  | 45        | 34                 | 59            | 95            | 2,008                            | 3,232               | 804                            | 5.6 (4.9, 6.1)               | 170                   |
| 4                  | 33        | 33                 | 66            | 107           | 2,190                            | 3,525               | 619                            | 5.0 (4.7, 5.3)               | 143                   |
| 5                  | 32        | 32                 | 69            | 112           | 2,221                            | 3,574               | 702                            | 5.1 (4.7, 5.5)               | 143                   |
| 6                  | 35        | 32                 | 88            | 142           | 2,829                            | 4,554               | 856                            | 5.4 (4.9, 5.8)               | 141                   |
| 7                  | 32        | 30                 | 90            | 145           | 2,697                            | 4,341               | 933                            | 5.6 (5.2, 6.1)               | 163                   |
| 8                  | 28        | 32                 | 104           | 168           | 3,332                            | 5,362               | 942                            | 5.7 (5.2, 6.1)               | 156                   |
| 9                  | 29        | 35                 | 92            | 148           | 3,227                            | 5,193               | 835                            | 5.5 (5.0, 5.8)               | 158                   |
| Total              | 309       | 35                 | 664           | 1,069         | 21,347                           | 34,355              | 6,786                          | 5.2 (4.8, 5.8)               | 1,367                 |

<sup>a</sup>There were about 18 additional make-up routes (about 4-5 per quarter), each with stops from multiple routes.

<sup>b</sup>Total route driving distance is estimated from the route distance and the number of sampling dates. The exact distance varied based on makeup routes, route deviations, etc.

<sup>c</sup>Road segments are 100 m long. Segments were excluded if they were on A1 roads (e.g., I-5 and WA-520), had a median visit duration of less than 5s per visit, or had fewer than 23 visits.

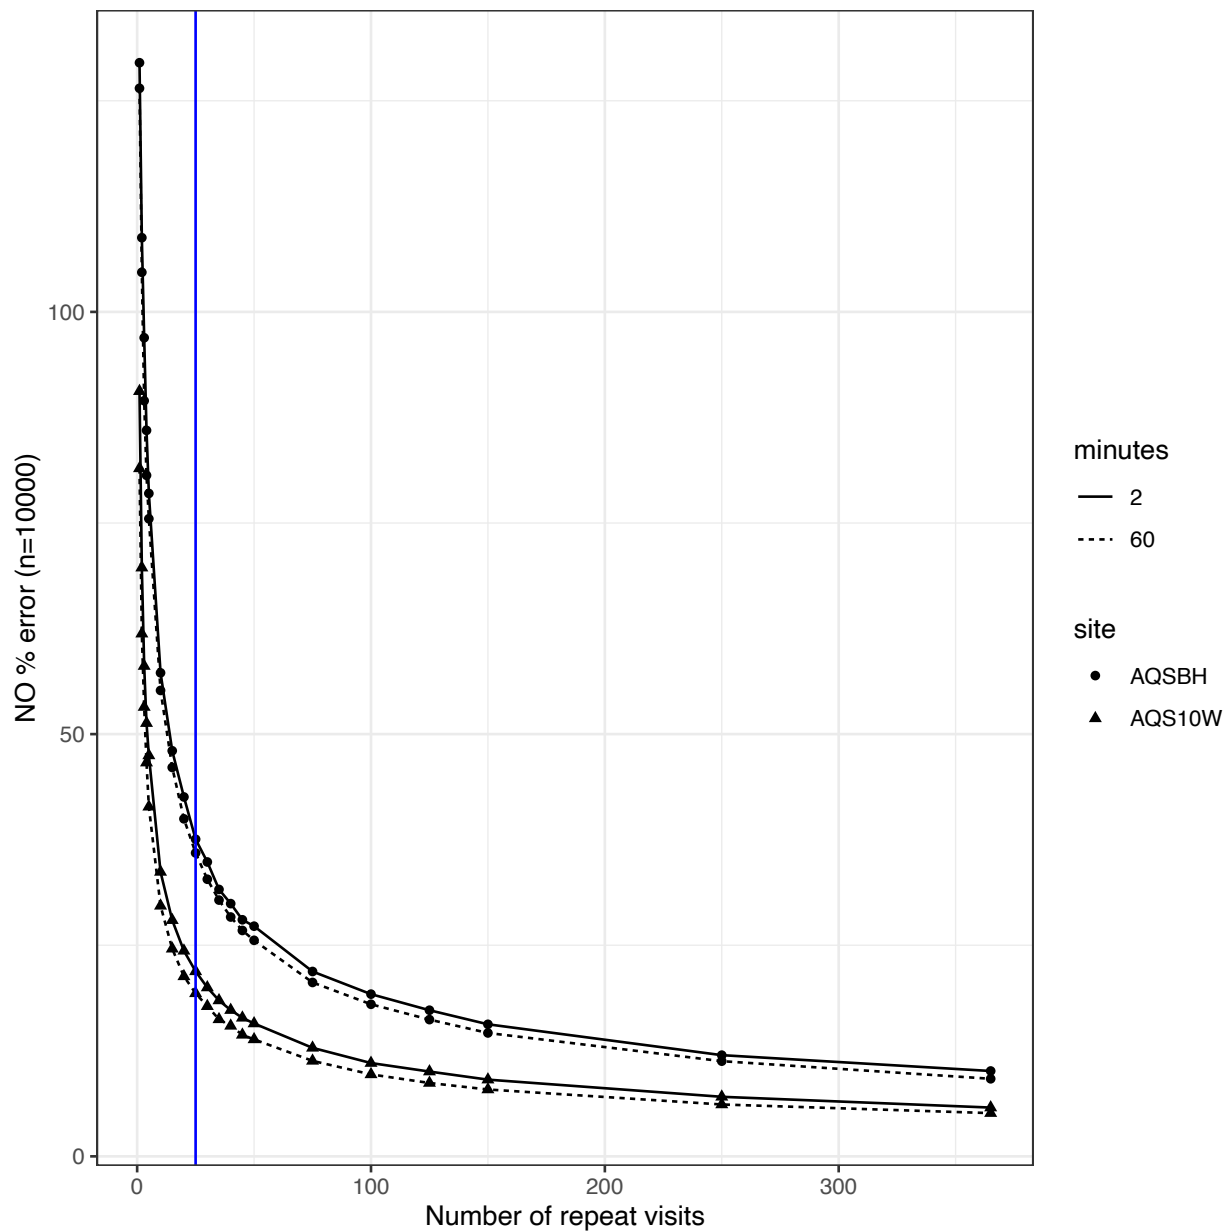

Figure S2. Mean percent error  $(\text{estimated\_conc} - \text{true\_conc}) / \text{true\_conc} * 100$  in the estimated nitrogen monoxide (NO) annual average at the 10<sup>th</sup> & Weller (AQS10W; near-road site) and Beacon Hill (AQSBH; background site) regulatory sites from repeated short-term random samples (2- and 60-min), when compared to the “true” annual average estimated from all the available 2019 data. Estimates are for 10,000 simulations of random sampling without replacement. The blue vertical line is for 25 repeat visits.

Table S2. Air pollutants and other parameters measured with mobile monitoring.

| Parameter                                                | Instrument                              | Manufacturer         | Measurement Range                                    | Limit of Quantification                      | Time Resolution |
|----------------------------------------------------------|-----------------------------------------|----------------------|------------------------------------------------------|----------------------------------------------|-----------------|
| <b>Particles (pt)</b>                                    |                                         |                      |                                                      |                                              |                 |
| UFP                                                      |                                         |                      |                                                      |                                              |                 |
| 10-420 nm<br>(13-bin<br>PSD <sup>a</sup> )               | NanoScan<br>3910                        | TSI                  | 10 <sup>2</sup> - 10 <sup>6</sup> pt/cm <sup>3</sup> | 10 pt/ cm <sup>3</sup>                       | 60 sec          |
| 10-700 nm                                                | DiSCmini                                | Testo                | 10 <sup>3</sup> - 10 <sup>6</sup> pt/cm <sup>3</sup> | 500-2,000<br>pt/cm <sup>3</sup> <sup>b</sup> | 1 sec           |
| 20-1,000 nm                                              | PTRAK 8525                              | TSI                  | 0 - 5x10 <sup>5</sup><br>pt/cm <sup>3</sup>          | 1 pt/cm <sup>3</sup>                         | 1 sec           |
| 36-1,000 nm                                              | PTRAK 8525,<br>with diffusion<br>screen | TSI                  | 0 - 5x10 <sup>5</sup><br>pt/cm <sup>3</sup>          | 1 pt/cm <sup>3</sup>                         | 1 sec           |
| BC                                                       | microAeth<br>MA200                      | AethLabs             | 0 - 10 <sup>6</sup> ng/m <sup>3</sup>                | 30 ng BC/m <sup>3</sup> <sup>c</sup>         | 10 sec          |
| Light scattering<br>nephelometer<br>(PM <sub>2.5</sub> ) | M903                                    | Radiance<br>Research | 0 - >1 km <sup>-1</sup>                              | 10 <sup>-6</sup> m <sup>-1</sup>             | 10 sec          |
| <b>Gases</b>                                             |                                         |                      |                                                      |                                              |                 |

|                                        |                      |                            |                                  |          |       |
|----------------------------------------|----------------------|----------------------------|----------------------------------|----------|-------|
| NO <sub>2</sub>                        | CAPS NO <sub>2</sub> | Aerodyne<br>Research, Inc. | 0 – 2x10 <sup>3</sup> ppb        | 2 ppbv   | 1 sec |
| CO <sub>2</sub>                        | LI-850               | Li-Cor                     | 0-5x10 <sup>3</sup> ppm<br>(vol) | 100 ppmv | 1 sec |
| CO <sup>d</sup>                        | CO Monitor<br>T15N   | Langan, Inc.               | 0-200 ppm                        | 0.1 ppm  | 1 sec |
| <b>Other</b>                           |                      |                            |                                  |          |       |
| Temperature                            | Onset UX100-<br>011  | HOBO                       | -4-158°F                         |          | 1 sec |
| Relative<br>humidity                   | Onset UX100-<br>011  | HOBO                       | 0-95%                            |          | 1 sec |
| Positioning &<br>real-time<br>tracking | DG-500               | US GlobalSat               | 0-515 m/sec<br>speed             | 2.5 m    | 1 sec |

<sup>a</sup> PSD: particle size distribution

<sup>b</sup> estimate; detection limit is dependent on particle size

<sup>c</sup> for a 5 min time base, 150 ml/min flow rate

<sup>d</sup> CO measurements were collected but not utilized because they did not meet our quality assurance standards

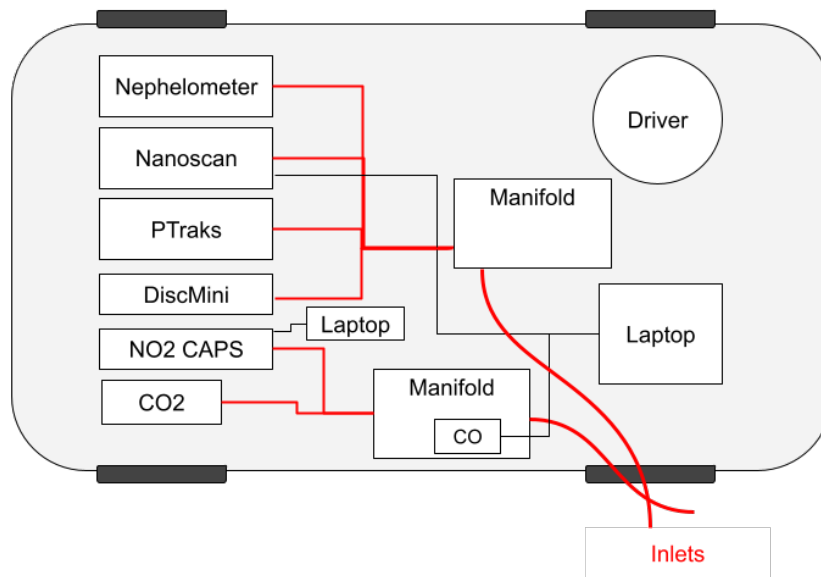

Figure S3. In-vehicle configuration

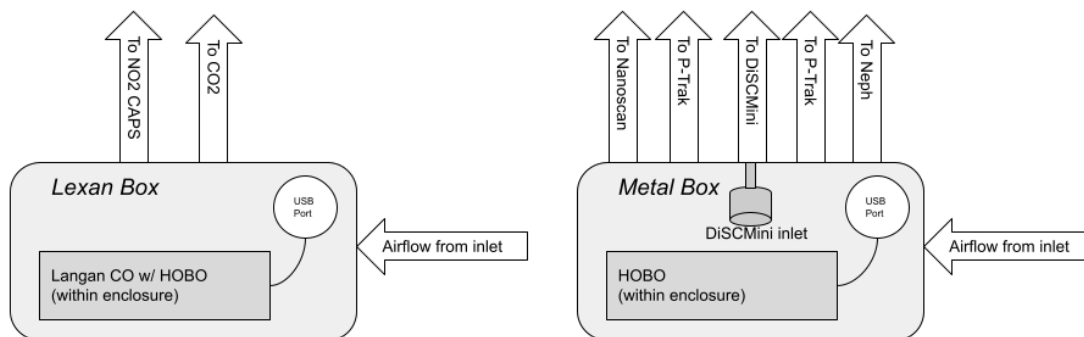

Figure S4. Manifold schematics

## 1.2 Quality Assurance and Quality Control

*Note S2. Quality assurance and quality control procedures*

### *Data Management System*

After each drive, the field technician uploaded each instrument's file to the server using a standardized file naming convention. These files were automatically loaded into a MySQL database every morning at 4 a.m. A report was produced automatically that showed the time series plot of each instrument, counts of the times of day that each stop on the route had been visited to date, and a map that highlighted any missed stops. The driver reviewed these data before starting the next day's drive. Single missed stops could be visited on the way to another day's route or on a day dedicated to make-up stops. In addition, a project manager, information technology (IT) specialist, and several data analysts routinely reviewed and worked with the data, thus allowing for additional feedback.

We carried out an extensive independent code review of the database and made further improvements to the system before completely reloading all raw data files into the database and locking the final version.

### *Instrumentation*

To ensure instrument accuracy, all gas instruments were calibrated before the campaign and regularly thereafter. Particle instruments were purchased new and arrived with calibration certifications, or they were compared to like instruments that had been serviced prior to the study.

Primary and backup instruments were collocated every few weeks on route to assess the precision (repeatability) of our measurements in different environments and over time.

### *Data Cleaning*

We conducted various quality control procedures prior to conducting data analyses. We added a ten-second lag to all the instrument readings to account for the time required for a



volume of air to travel from the sampling inlet to each instrument. This was based on the manifold volumes and instrument flow rates.

Readings with instrument error codes were dropped. This included, for example, aethalometer (BC) pump flow errors and readings of NO<sub>2</sub> field baseline samples.

Aethalometers were checked to ensure that the filter attenuation was below 50% thus ensuring optimal instrument sensitivity at all times.<sup>4,5</sup>

Gas instruments and nephelometers (which were checked for a response against CO<sub>2</sub> gas<sup>6</sup>) were calibrated various times during the study period. CO and nephelometer instruments were automatically reset during calibrations. CO<sub>2</sub> and NO<sub>2</sub> instruments were manually calibrated using least squares linear regression models with reference concentrations as the independent variable and instrument readings as the response variable.<sup>7,8</sup> Particle instruments were checked for zero concentration responses by placing a high efficiency particle air (HEPA) filter on the instrument or manifold inlet.

We calculated stop visit medians (about 2 minutes worth of data) with the resulting data. Readings outside the instrument ranges, screened P-TRAK readings below 100 pt/cm<sup>3</sup>, and other UFP instrument readings below 300 pt/cm<sup>3</sup> (NanoScans, unscreened P-TRAKS) were dropped.

We investigated collocated instrument readings to assess repeatability. Comparing instruments to one another is particularly common with particle instruments since there is no standard for the field calibration of these instruments. Backup NO<sub>2</sub> (“NO2\_1”) and NanoScan (“PMSCAN\_3”) instruments were adjusted based on readings from their respective primary instruments during the beginning of the study since these were used exclusively at the beginning of the study. We calibrated UFP readings from the two DiSCmini instruments used in this study to the mean of their responses.<sup>9</sup> This was done to ensure consistency across instruments since these were equally used throughout the study period. In this approach, a calibration curve is established by fitting separate linear regression models to each instrument, with that instrument’s readings as the independent variable and the mean reading of duplicate instruments as the response variable.

The backup CO<sub>2</sub> instrument (CO2\_19) was dropped since it produced unstable responses over time, it did not always correlate well with the primary instrument (CO2\_14), and it was solely used as a collocation instrument (i.e., never on its own). All CO readings were dropped

since instruments produced unstable readings, and collocated instruments were poorly correlated with one another or observations from collocations at regulatory monitoring sites.

### *Quality Control Results Summary*

SI Table S2 shows the calibration curve coefficient estimates used to manually adjust CO and NO<sub>2</sub>.

In response to clean, filtered air, particle instruments generally reported near zero concentrations that were also lower than a “low” ambient concentration, as determined from the data (SI Figure S6). Some exceptions included the backup aethalometer (BC\_0066), which reported negative readings, though this was based on very little data (two 2-min medians). The primary aethalometer (BC\_0063) and nephelometer instruments (PM25\_176), as well as the backup DiscMini instrument (PMDISC\_8) additionally reported low ambient concentrations that were similar to some of their filtered air responses, suggesting that these instruments may be less sensitive to very low ambient concentrations.

Collocated instruments generally produced similar responses (SI Figure S7). As noted above, the backup CO<sub>2</sub> instrument (CO2\_19) and all CO instruments were dropped because they did not meet quality assurance standards. Backup NO<sub>2</sub> and NanoScan instruments (NO2\_1, PMSCAN\_3) were adjusted to better align with primary instrument readings.

Temperature and relative humidity conditions inside the manifold during site visits are presented in SI Table S3.

*Table S3. Distribution of calibration curve coefficient estimates.*

| <b>Pollutant<sup>a</sup></b> | <b>Instrument ID</b> | <b>Term</b> | <b>N<sup>b</sup></b> | <b>Min</b> | <b>Median</b> | <b>Max</b> |
|------------------------------|----------------------|-------------|----------------------|------------|---------------|------------|
| NO <sub>2</sub> (ppb)        | NO2_1                | slope       | 6                    | 1.09       | 1.14          | 1.20       |
| NO <sub>2</sub> (ppb)        | NO2_1                | intercept   | 6                    | -29.02     | -3.15         | -0.55      |
| NO <sub>2</sub> (ppb)        | NO2_2                | slope       | 18                   | 0.55       | 1.05          | 1.23       |

|                       |                    |           |    |      |      |      |
|-----------------------|--------------------|-----------|----|------|------|------|
| NO <sub>2</sub> (ppb) | NO2_2 <sup>c</sup> | intercept | 18 | 0    | 0    | 0    |
| CO (ppm)              | CO_1               | slope     | 16 | 1.05 | 1.10 | 1.16 |
| CO (ppm)              | CO_1               | intercept | 16 | 1.60 | 2.25 | 2.77 |
| CO (ppm)              | CO_190134          | slope     | 5  | 0.74 | 0.84 | 0.94 |
| CO (ppm)              | CO_190134          | intercept | 5  | 1.46 | 2.19 | 2.27 |
| CO (ppm)              | CO_3               | slope     | 13 | 0.20 | 0.41 | 0.82 |
| CO (ppm)              | CO_3               | intercept | 13 | 0.81 | 1.33 | 2.29 |

---

<sup>a</sup> CO<sub>2</sub> was automatically reset after each calibration, and no additional adjustments were necessary.

<sup>b</sup> N = number of calibration days.

<sup>c</sup> A no intercept model was fit to instrument NO2\_2, which reset after each baseline zero reading.

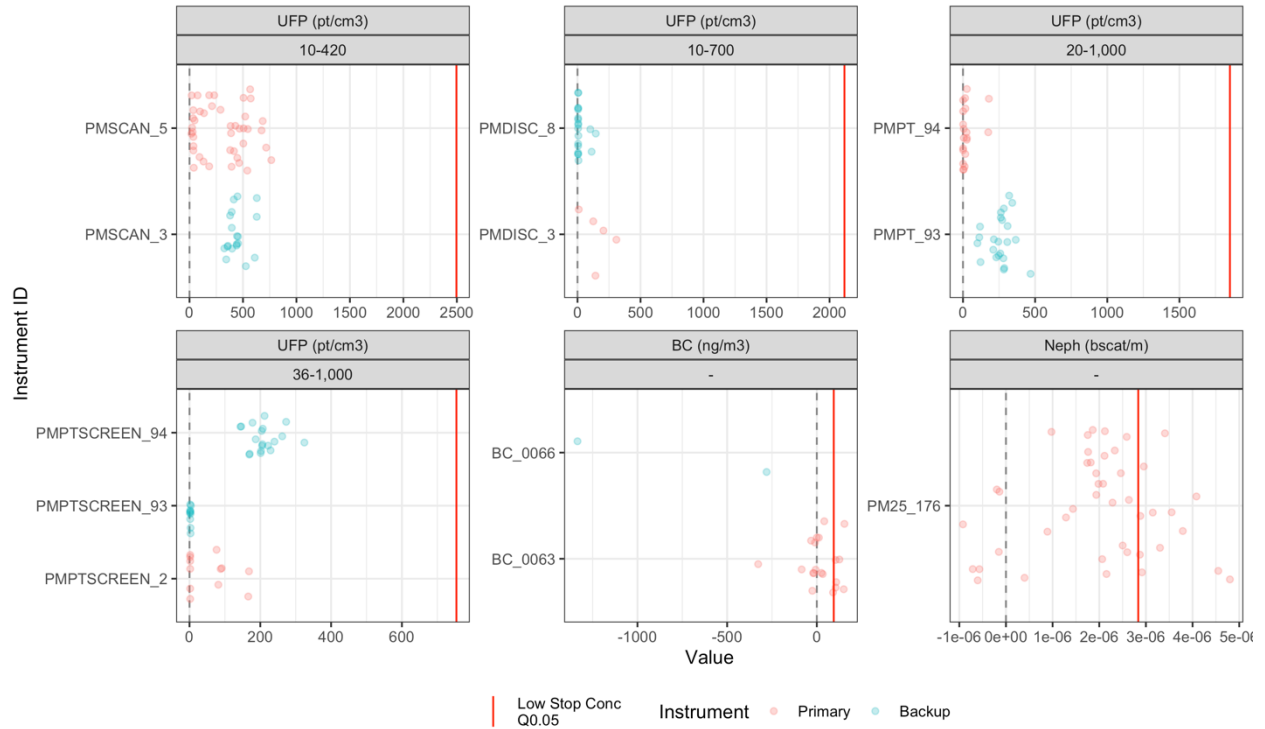

Figure S5. Particle instrument responses to filtered air (near 0 pt/cm<sup>3</sup>). Dots show median, two-minute instrument readings. Red lines are “low” ambient concentration references, based on the 5<sup>th</sup> quantile of stop concentrations for each pollutant. Responses for primary instruments are based on more instrument checks (data) throughout the study period.

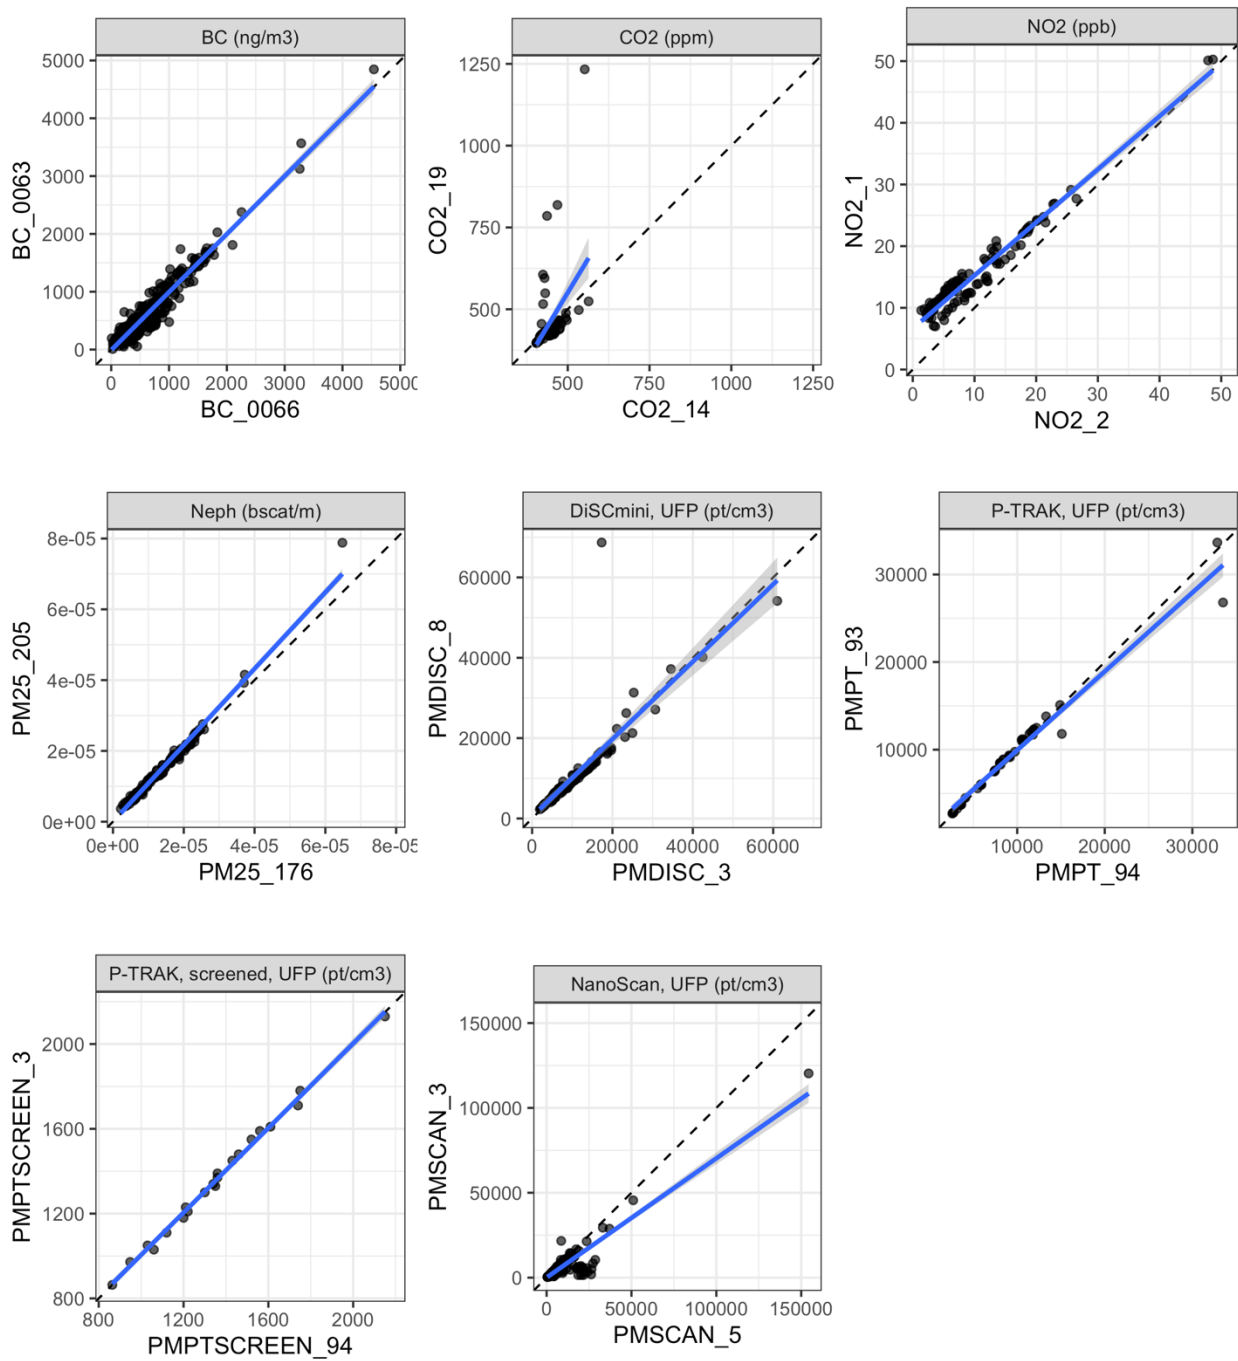

Figure S6. Comparison of two-minute median stop concentrations from instrument collocations. Gas values are post calibration. UFP instruments report number concentrations: particles (pt) per cm<sup>3</sup>.

Table S4. Distribution of temperature and relative humidity conditions inside the manifold during site visits (N=9,047 total).<sup>a</sup>

| Variable              | Min | Q05 | Q25 | Median | Q75 | Q95 | Max |
|-----------------------|-----|-----|-----|--------|-----|-----|-----|
| Relative Humidity (%) | 12  | 26  | 37  | 44     | 51  | 61  | 78  |
| Temperature (F)       | 50  | 60  | 64  | 67     | 72  | 80  | 96  |

<sup>a</sup> Measurements are for 2-min medians from within the vehicle (manifold) for 9,047 site visits

Equation S1. Nephelometer light scattering (bscat) calibration curve for PM<sub>2.5</sub>

$$PM_2 \left( \frac{ug}{m^3} \right) = 25.10(bscat \times 10^{-4}) + 1.06$$

Table S5. Collocation regulatory sites and similar parameters measured.<sup>a</sup>

| Station (ID)                               | Location                             | PM <sub>2.5</sub><br>FRM | PM <sub>2.5</sub><br>FEM | bscat<br>& PM <sub>2.5</sub><br>bscat | BC  | NO <sub>2</sub> <sup>b</sup> |
|--------------------------------------------|--------------------------------------|--------------------------|--------------------------|---------------------------------------|-----|------------------------------|
| 10 <sup>th</sup> & Weller,<br>Seattle (BK) | Urban Center; near-road              | No                       | Yes                      | No                                    | Yes | Yes                          |
| Tukwila Allentown<br>(BL)                  | Suburban, industrial,<br>residential | No                       | Yes                      | Yes                                   | Yes | No                           |
| Beacon Hill (BW)                           | Suburban, commercial,<br>residential | Yes                      | Yes                      | No                                    | No  | Yes                          |
| Duwamish (CE)                              | Urban center, industrial             | No                       | Yes                      | Yes                                   | Yes | No                           |
| James St & Central<br>Ave, Kent (CW)       | Suburban, commercial                 | No                       | Yes                      | Yes                                   | Yes | No                           |

<sup>a</sup> FRM: federal reference method; FEM: federal equivalent method; bscat: beta light scattering; Temp: temperature (°F); RH: relative humidity

<sup>b</sup> or NO<sub>y</sub>-NO

### 1.3 Computation

*Note S3. Software used in analyses.*

We conducted all analyses using MySQL<sup>10</sup> and R (v 3.6.2, using RStudio v 1.2.5033).<sup>11</sup> We used the R packages: Broom (v. 0.5.5),<sup>12</sup> colorspace (v. 1.4-1),<sup>13</sup> cowplot (v. 1.0.0),<sup>14</sup> dplyr (v. 1.0.6),<sup>15</sup> fmsb (v. 0.7.1),<sup>16</sup> forcats (v. 0.5.0),<sup>17</sup> GGally (v. 2.1.1),<sup>18</sup> ggmap (v. 3.0.0),<sup>19</sup> ggplot2 (v. 3.3.3),<sup>20(p2)</sup> ggpmisc (v. 0.4.0),<sup>21</sup> ggpp (v. 0.4.0),<sup>22</sup> ggpubr (v. 0.2.5),<sup>23</sup> ggrepel (v. 0.8.1),<sup>24</sup> ggspatial (v. 1.1.4),<sup>25</sup> gstat (v. 2.0-7),<sup>26</sup> kableExtra (v. 1.1.0),<sup>27</sup> knitr (v. 1.28),<sup>28</sup> lubridate (v. 1.7.10),<sup>29</sup> magrittr (v. 1.5),<sup>30</sup> purrr (v. 0.3.3),<sup>31</sup> readr (v. 1.3.1),<sup>32</sup> sf (v. 0.9-5),<sup>33</sup> spData (v. 0.3.10),<sup>34</sup> stringr (v. 1.4.0),<sup>35</sup> tibble (v. 3.1.2),<sup>36</sup> tidyr (v. 1.0.2),<sup>37</sup> tidyverse (v. 1.3.0),<sup>38</sup> units (v. 0.6-7)<sup>39</sup> and VCA (v. 1.4.2).<sup>40</sup> We created all maps with map tiles by Stamen Design<sup>41</sup> under CC BY 3.0,<sup>42</sup> using data by OpenStreetMap under ODbL.<sup>43</sup>

## 2 Results

### 2.1 Data Collected

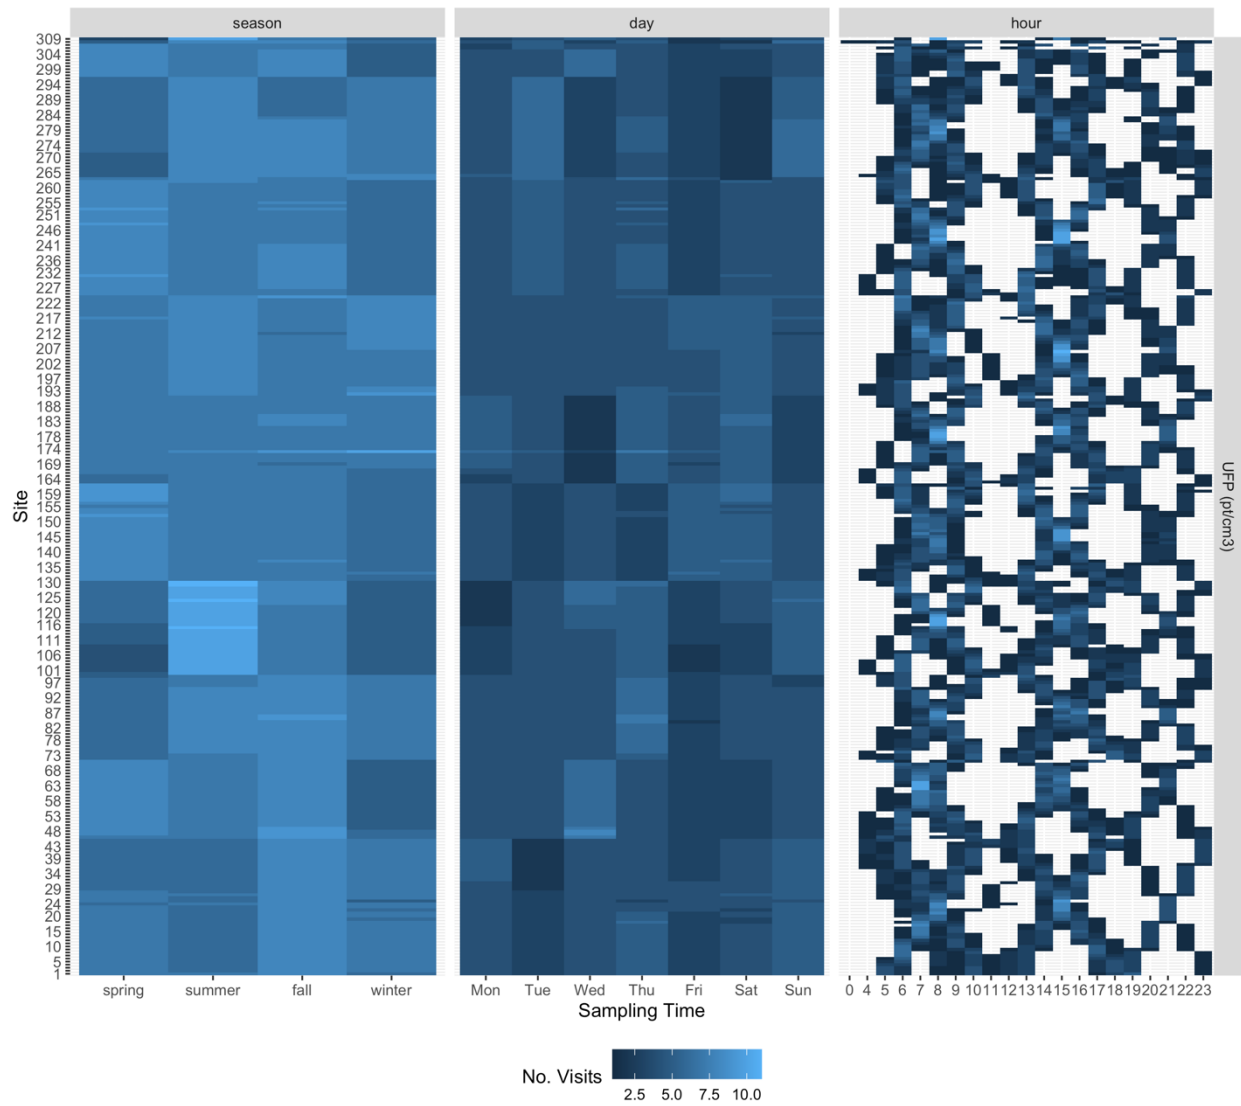

Figure S7. Number of site visits per time period. Showing UFP data, though all instruments were similar.



Table S6. Distribution of site visit pollutant concentrations (N = 309 sites x ~ 29 visits/site).

| <b>Pollutant<sup>a</sup></b>           | <b>Instrument</b> | <b>N</b> | <b>Q05</b> | <b>Q25</b> | <b>Median</b> | <b>Q75</b> | <b>Q95</b> | <b>Q95/Q05</b> |
|----------------------------------------|-------------------|----------|------------|------------|---------------|------------|------------|----------------|
| BC (ng/m <sup>3</sup> )                | MA200             | 8,861    | 94         | 242        | 402           | 694        | 1,736      | 18             |
| CO <sub>2</sub> (ppm)                  | SenseAir          | 8,950    | 405        | 415        | 425           | 441        | 478        | 1.2            |
| NO <sub>2</sub> (ppb)                  | CAPS              | 8,766    | 1.6        | 4          | 7.2           | 13         | 23         | 14             |
| PM <sub>2.5</sub> (ug/m <sup>3</sup> ) | M903              | 8,786    | 1.8        | 2.7        | 3.9           | 5.8        | 11         | 6.1            |
| UFP (pt/cm <sup>3</sup> ) 10-420 nm    | NanoScan          | 8,999    | 2,496      | 5,060      | 8,150         | 13,165     | 27,235     | 11             |
| UFP (pt/cm <sup>3</sup> ) 10-700 nm    | DiSCmini          | 8,697    | 2,118      | 4,336      | 7,028         | 11,413     | 24,575     | 12             |
| UFP (pt/cm <sup>3</sup> ) 20-1,000 nm  | P-TRAK            | 8,729    | 1,850      | 3,640      | 5,850         | 9,135      | 18,080     | 9.8            |
| UFP (pt/cm <sup>3</sup> ) 36-1,000 nm  | P-TRAK            | 8,908    | 754        | 1,580      | 2,520         | 4,050      | 8,136      | 11             |

<sup>a</sup> UFP instruments report number concentrations for a specific particle size range: particles (pt) per cm<sup>3</sup>.

Table S7. Original and final mobile monitoring stop measurements (~2 min each).

| Pollutant <sup>a</sup>                 | Original Stop Measurements <sup>b</sup> |        | Dropped Stop Measurements <sup>c</sup> |       | Final Stop Measurements <sup>b</sup> |        |
|----------------------------------------|-----------------------------------------|--------|----------------------------------------|-------|--------------------------------------|--------|
|                                        | N                                       | %      | N                                      | %     | N                                    | %      |
| CO <sub>2</sub> (ppm)                  | 8,982                                   | 99.28% | 32                                     | 0.36% | 8,950                                | 98.93% |
| BC (ng/m <sup>3</sup> )                | 9,005                                   | 99.54% | 144                                    | 1.6%  | 8,861                                | 97.94% |
| Neph (bscat/m)                         | 8,802                                   | 97.29% | 16                                     | 0.18% | 8,786                                | 97.12% |
| NO <sub>2</sub> (ppb)                  | 8,913                                   | 98.52% | 147                                    | 1.65% | 8,766                                | 96.89% |
| UFP (pt/cm <sup>3</sup> ), 10-420 nm   | 9,000                                   | 99.48% | 1                                      | 0.01% | 8,999                                | 99.47% |
| UFP (pt/cm <sup>3</sup> ), 10-700 nm   | 8,790                                   | 97.16% | 93                                     | 1.06% | 8,697                                | 96.13% |
| UFP (pt/cm <sup>3</sup> ), 20-1,000 nm | 8,731                                   | 96.51% | 2                                      | 0.02% | 8,729                                | 96.49% |
| UFP (pt/cm <sup>3</sup> ), 36-1,000 nm | 8,908                                   | 98.46% | 0                                      | 0%    | 8,908                                | 98.46% |
| TOTAL                                  | 71,131                                  | 98.28% | 435                                    | 0.61% | 70,696                               | 97.68% |

<sup>a</sup> UFP instruments report number concentrations for a specific size range: particles (pt) per cm<sup>3</sup>.

<sup>b</sup> Original and final stop measurement percents are based on the total number of stops that collected at least one 2-minute measurement in the campaign (9,047; Total = 72,376 = 9,047 stops x 8 instruments).

<sup>c</sup> Measurements were dropped for various reasons: readings outside of each instrument's reporting range; NanoScans and non-screened P-TRAKS readings < 300 pt/cm<sup>3</sup>; backup CO<sub>2</sub> instrument (CO2\_19) and all CO (both instruments) readings because these did not meet QC protocols (see Note S2). Dropped stops percents are based on the original stop measurements (the measurements actually collected).

## 2.2 Site Visits

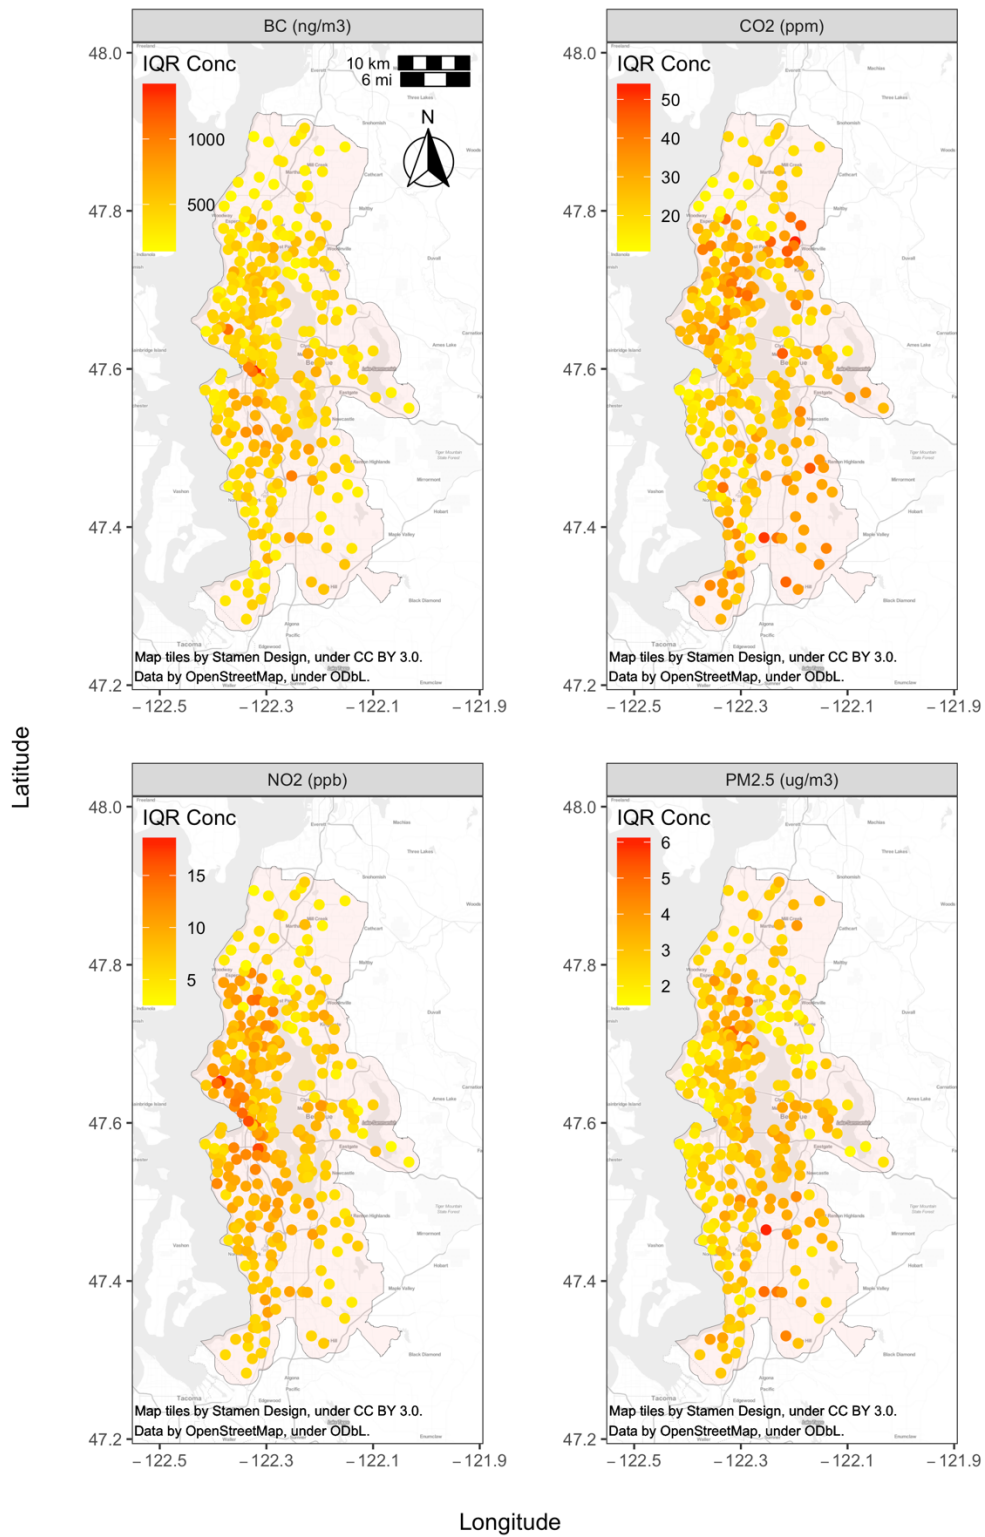

Figure S8. Interquartile range (IQR) of site visit concentrations for BC, CO<sub>2</sub>, NO<sub>2</sub> and PM<sub>2.5</sub> (N~29 visits per site).

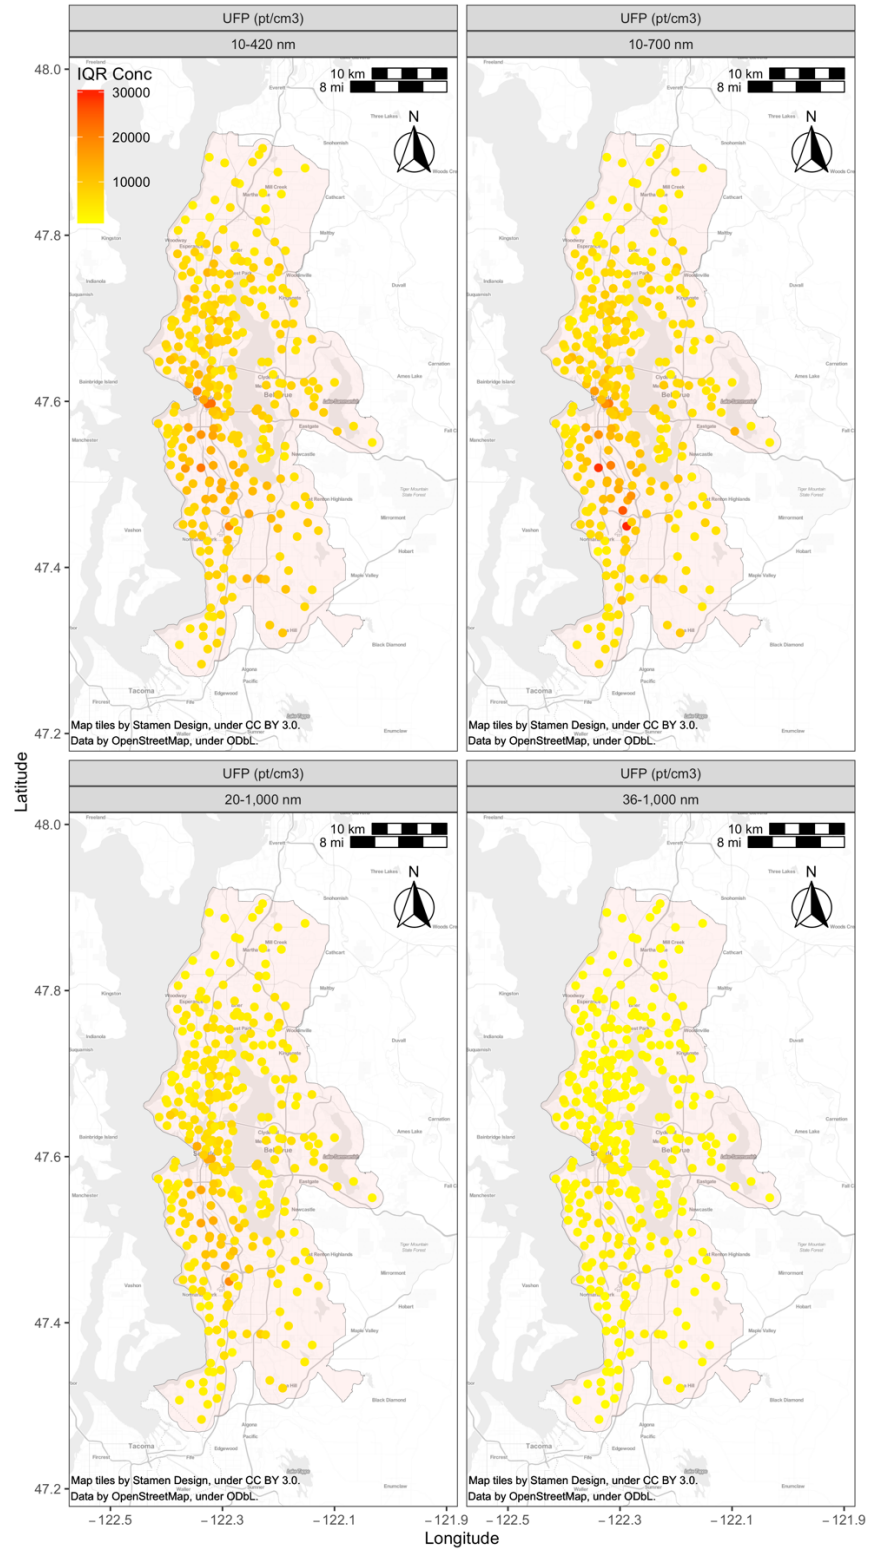

Figure S9. Interquartile range (IQR) of site of visit concentrations (N~29 visits per site) for UFP measures with different instruments and particle size ranges (nm).

Table S8. Comparison of within- and between- site variability.

| Pollutant                              | Instrument     | Within-Site Variability of Median Visit Conc's |             | Between-Site Variability of Annual Avg Conc's |
|----------------------------------------|----------------|------------------------------------------------|-------------|-----------------------------------------------|
|                                        |                | Median (Range) IQR                             | Max/Min IQR | IQR                                           |
| BC (ng/m <sup>3</sup> )                | MA200          | 410 (142-1,421)                                | 10.0        | 210                                           |
| CO <sub>2</sub> (ppm)                  | SenseAir       | 24 (11-54)                                     | 5.0         | 8                                             |
| NO <sub>2</sub> (ppb)                  | CAPS           | 7.7 (2.5-18.6)                                 | 7.3         | 3                                             |
| PM <sub>2.5</sub> (ug/m <sup>3</sup> ) | M903           | 2.7 (1.5-6.1)                                  | 4.2         | 0.8                                           |
| UFP (pt/cm <sup>3</sup> ), 10-420      | NanoScan       | 7,183 (2,834-22,625)                           | 8.0         | 2,972                                         |
| UFP (pt/cm <sup>3</sup> ), 10-700 nm   | DiSCmini       | 6,103 (1,872-30,477)                           | 16.3        | 3,192                                         |
| UFP (pt/cm <sup>3</sup> ), 20-1,000 nm | P-TRAK         | 4,720 (1,711-18,755)                           | 11.0        | 2,354                                         |
| UFP (pt/cm <sup>3</sup> ), 36-1,000 nm | P-TRAK, Screen | 2,185 (765-7,045)                              | 9.2         | 985                                           |

<sup>a</sup> Within-site variability is for site-specific IQR values of median visit concentrations (N = 309 site IQRs, each site has approximately 29 visits) and thus shows visit concentration data.

<sup>b</sup> Between-site variability shows the IQR of annual average concentrations (N=309 sites), as shown in Table 1 of the main document.

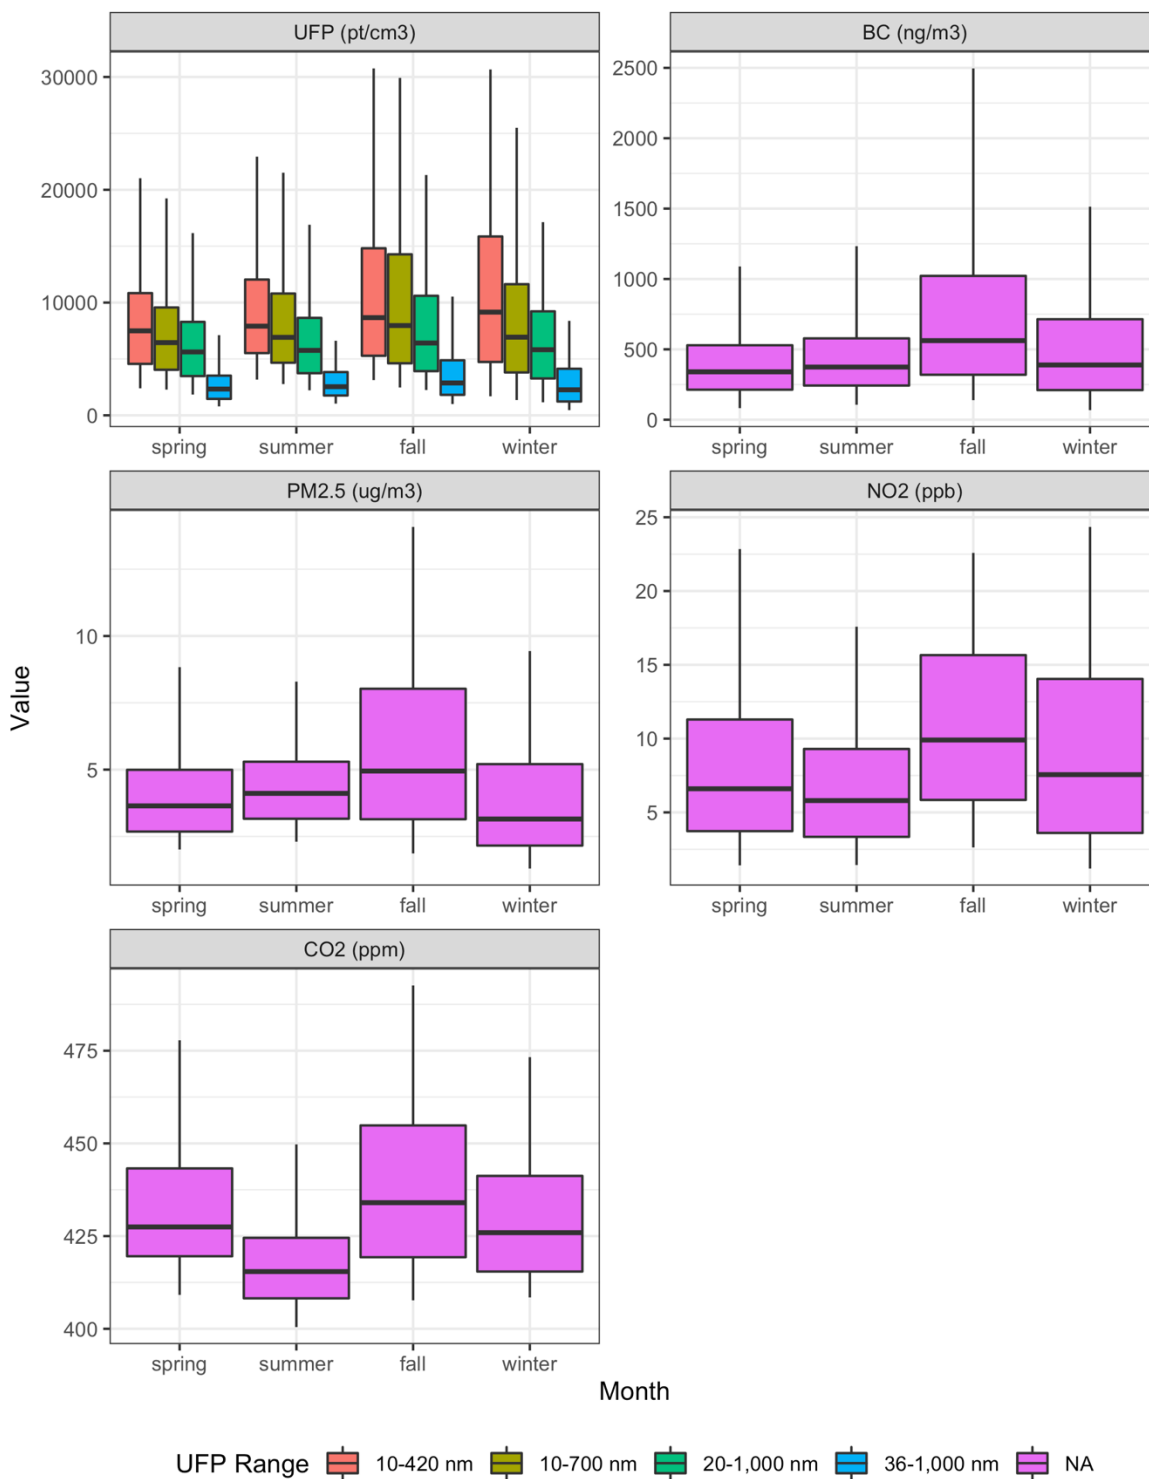

Figure S10. Median site visit concentrations by season. Lines connect median concentrations. Boxes show the 25<sup>th</sup>, 50<sup>th</sup> and 75<sup>th</sup> quantile; whiskers show the 5<sup>th</sup> and 95<sup>th</sup> quantiles.

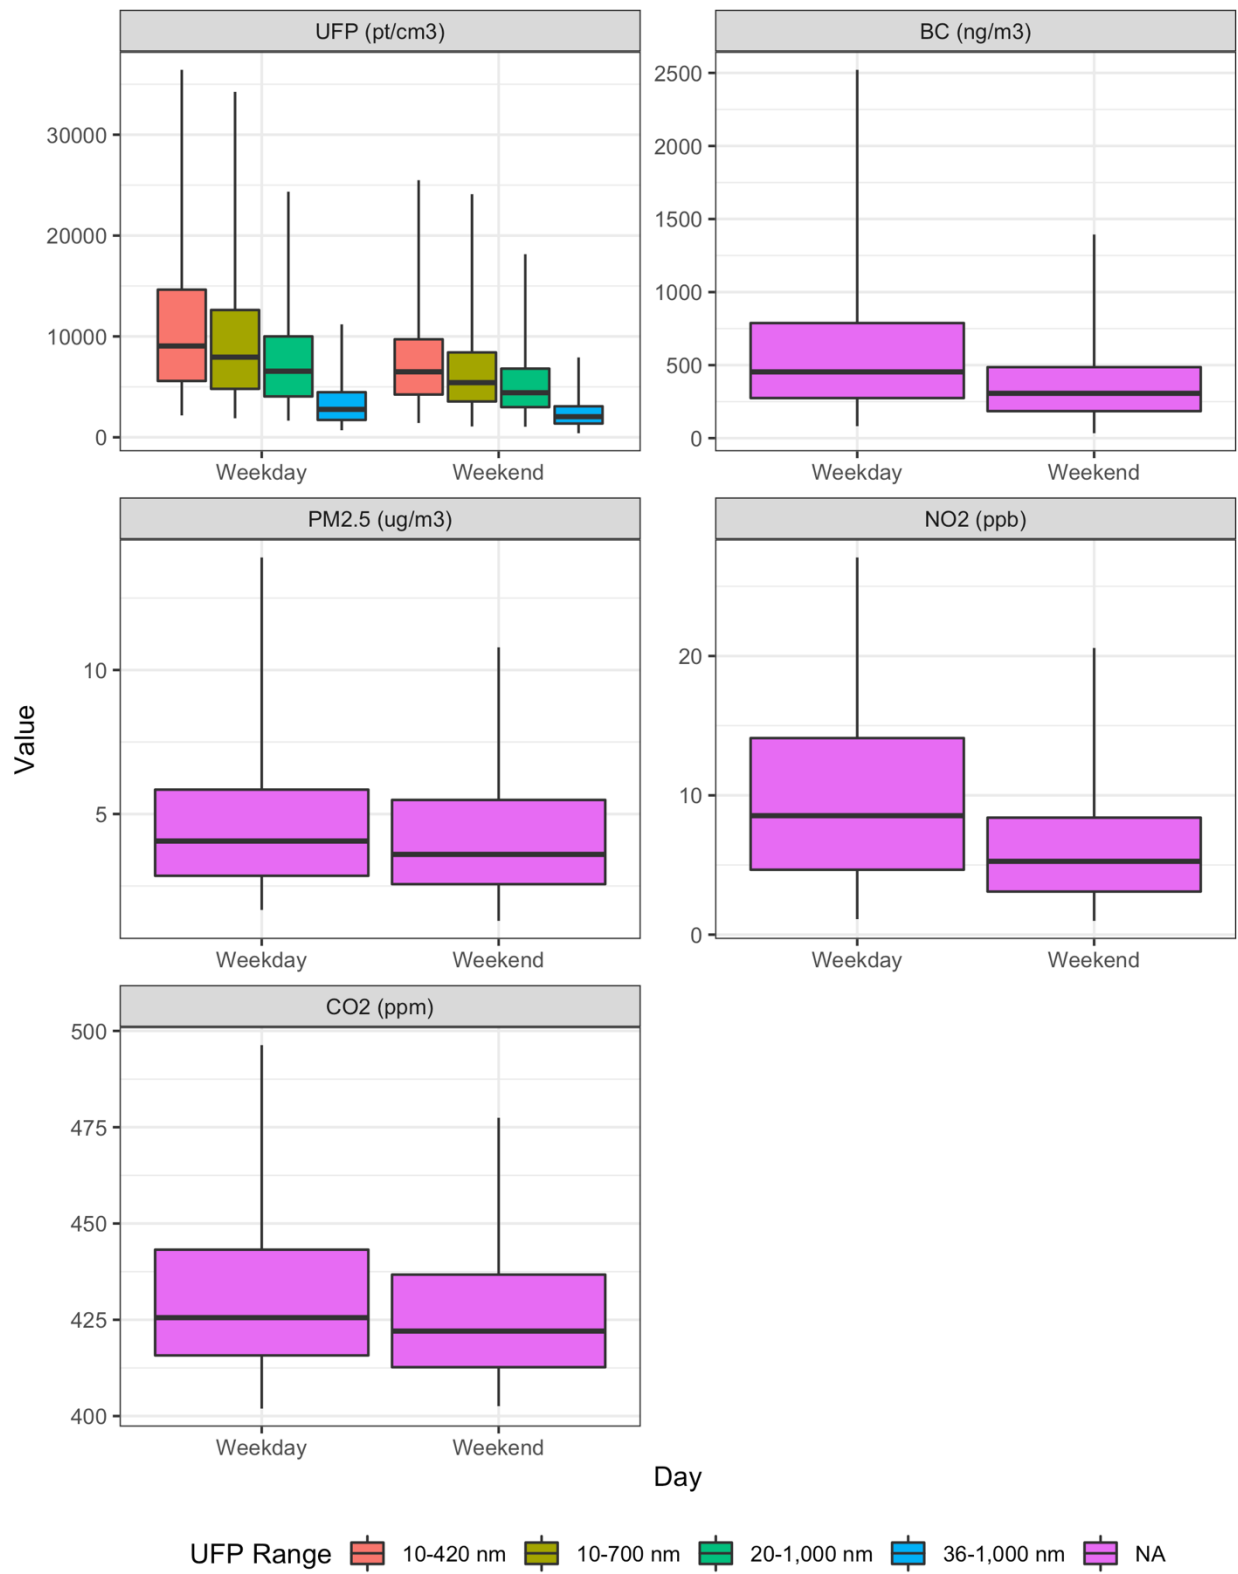

Figure S11. Median site visit concentrations by day of the week. Lines connect median concentrations. Boxes show the 25<sup>th</sup>, 50<sup>th</sup> and 75<sup>th</sup> quantile; whiskers show the 5<sup>th</sup> and 95<sup>th</sup> quantiles.

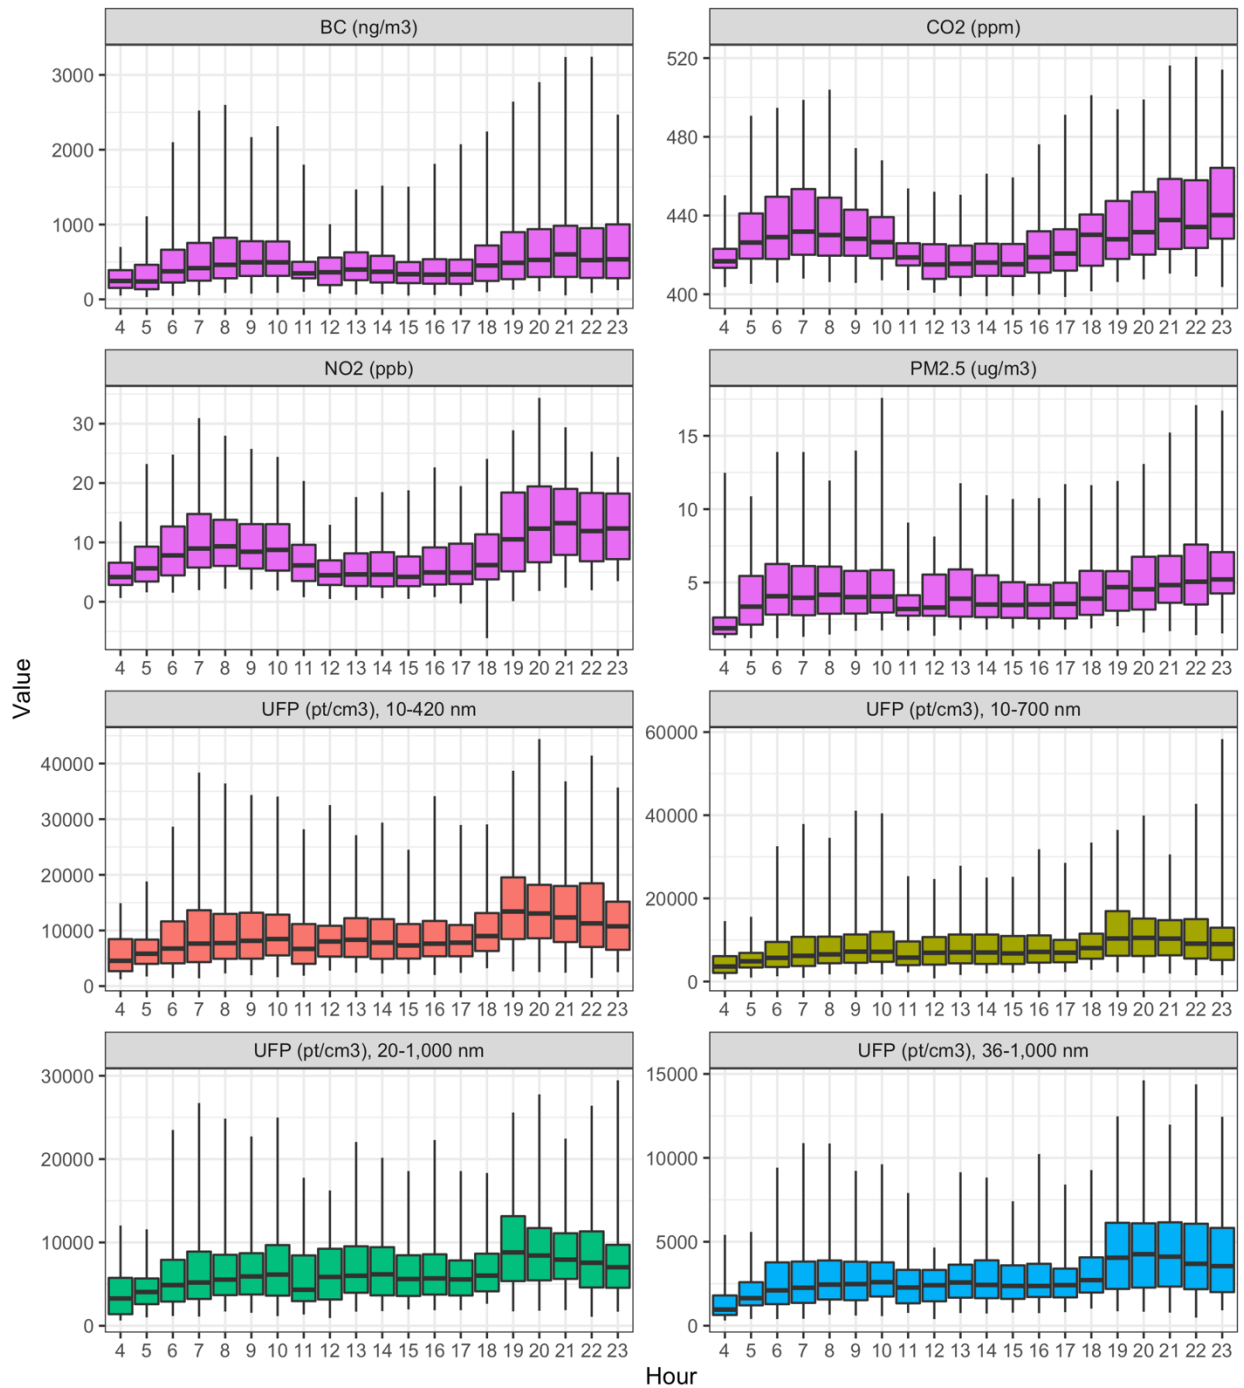

Figure S12. Median site visit concentrations by hour of the day. Lines connect median concentrations. Boxes show the 25<sup>th</sup>, 50<sup>th</sup> and 75<sup>th</sup> quantile; whiskers show the 5<sup>th</sup> and 95<sup>th</sup> quantiles.



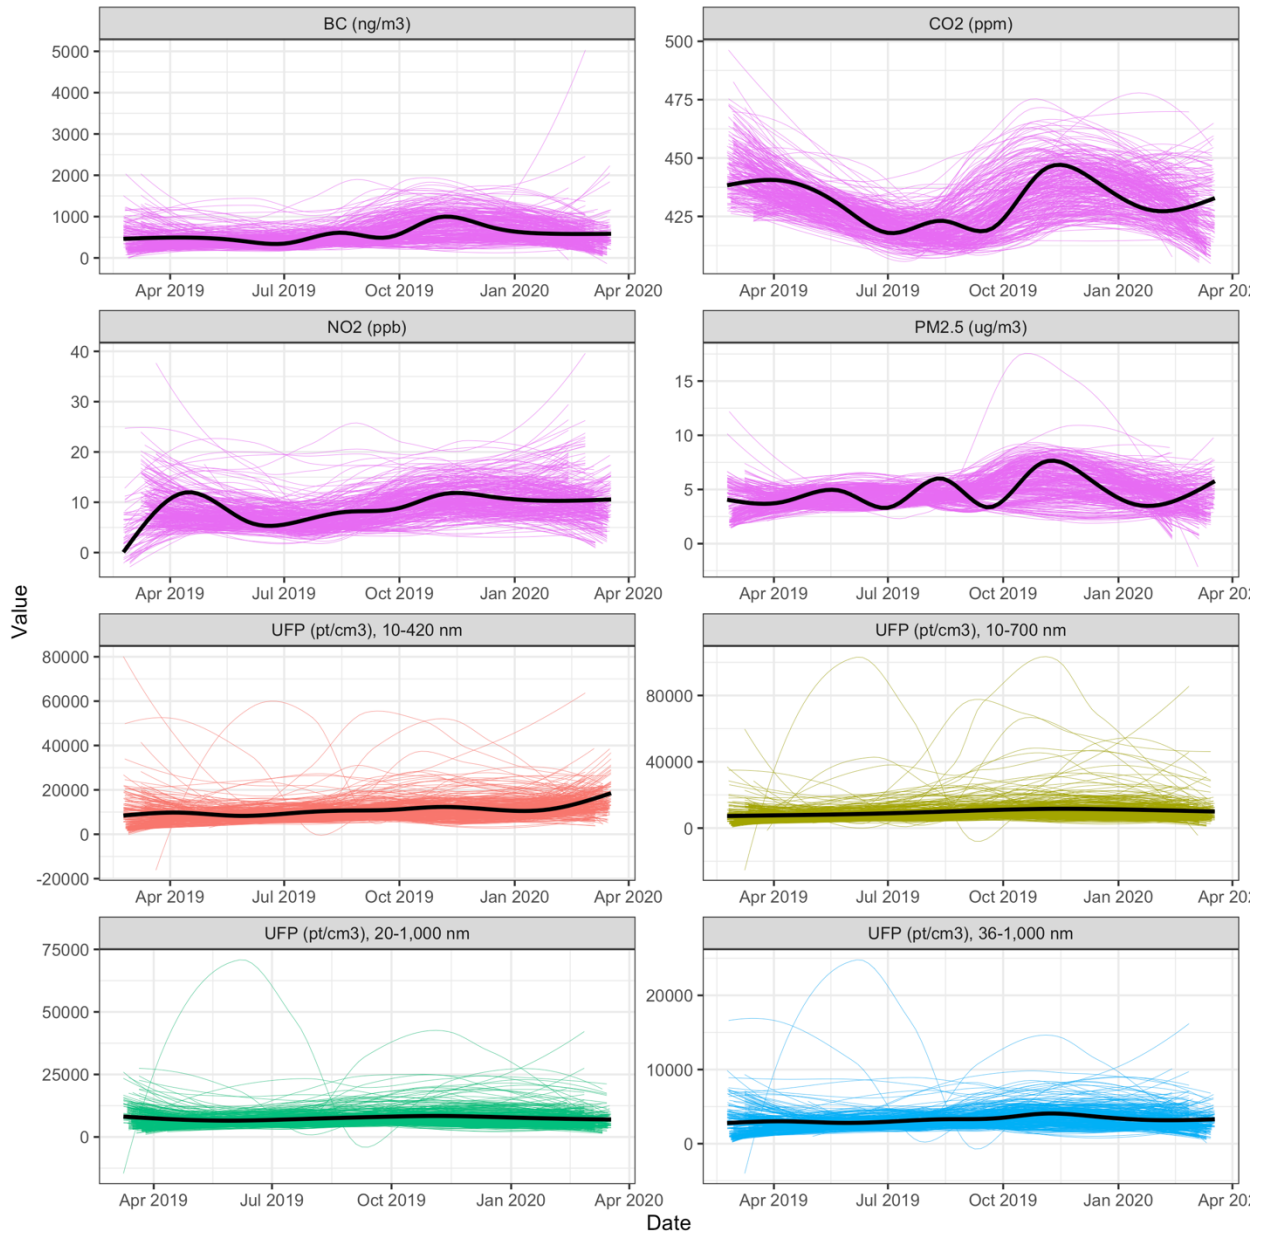

Figure S13. Site-specific pollutant concentrations over the course of the study. Thin lines show site-specific smooth (loess) fits for median visit concentrations ( $N \sim 29$  visits/site). Black lines show the overall smooth trends for all of the sites.

Table S9. Percent (%) of variability in visit concentrations explained by spatial and temporal factors.<sup>a</sup>

| <b>Pollutant</b>                          | <b>Instrument</b> | <b>Location<br/>(n=309)</b> | <b>Day of<br/>Week<br/>(n=7)</b> | <b>Hour of<br/>Day (n=21)</b> | <b>Season<br/>(N=4)</b> | <b>Residual<br/>Error</b> |
|-------------------------------------------|-------------------|-----------------------------|----------------------------------|-------------------------------|-------------------------|---------------------------|
| BC (ng/m <sup>3</sup> )                   | MA200             | 4.5%                        | 4.6%                             | 3.1%                          | 7.9%                    | 79.9%                     |
| CO <sub>2</sub> (ppm)                     | SenseAir          | 3.0%                        | 1.7%                             | 13.4%                         | 11.6%                   | 70.3%                     |
| NO <sub>2</sub> (ppb)                     | CAPS              | 9.7%                        | 6.1%                             | 12.6%                         | 4.5%                    | 67.1%                     |
| PM <sub>2.5</sub> (ug/m <sup>3</sup> )    | M903              | 0.2%                        | 1.1%                             | 2.8%                          | 8.9%                    | 87.0%                     |
| UFP (pt/cm <sup>3</sup> ),<br>10-420 nm   | NanoScan          | 6.9%                        | 3.1%                             | 2.0%                          | 1.8%                    | 86.2%                     |
| UFP (pt/cm <sup>3</sup> ),<br>10-700 nm   | DiSCmini          | 7.5%                        | 1.6%                             | 0.6%                          | 0.9%                    | 89.4%                     |
| UFP (pt/cm <sup>3</sup> ),<br>20-1,000 nm | P-TRAK            | 7.2%                        | 2.4%                             | 0.9%                          | 0.6%                    | 88.9%                     |
| UFP (pt/cm <sup>3</sup> ),<br>36-1,000 nm | P-TRAK,<br>Screen | 5.9%                        | 2.9%                             | 2.9%                          | 1.6%                    | 86.8%                     |

<sup>a</sup> Values are based on separate Analysis of Variance (ANOVA) models for each pollutant. The total percent is 100 for each pollutant. The location term represents between site variability across 309 sites. The day, hour and season terms represent temporal variability. The residual error term represents within-site variability across approximately 29 visits per site. The degrees of freedom for this error term varies by pollutant.

### 2.3 Annual Averages

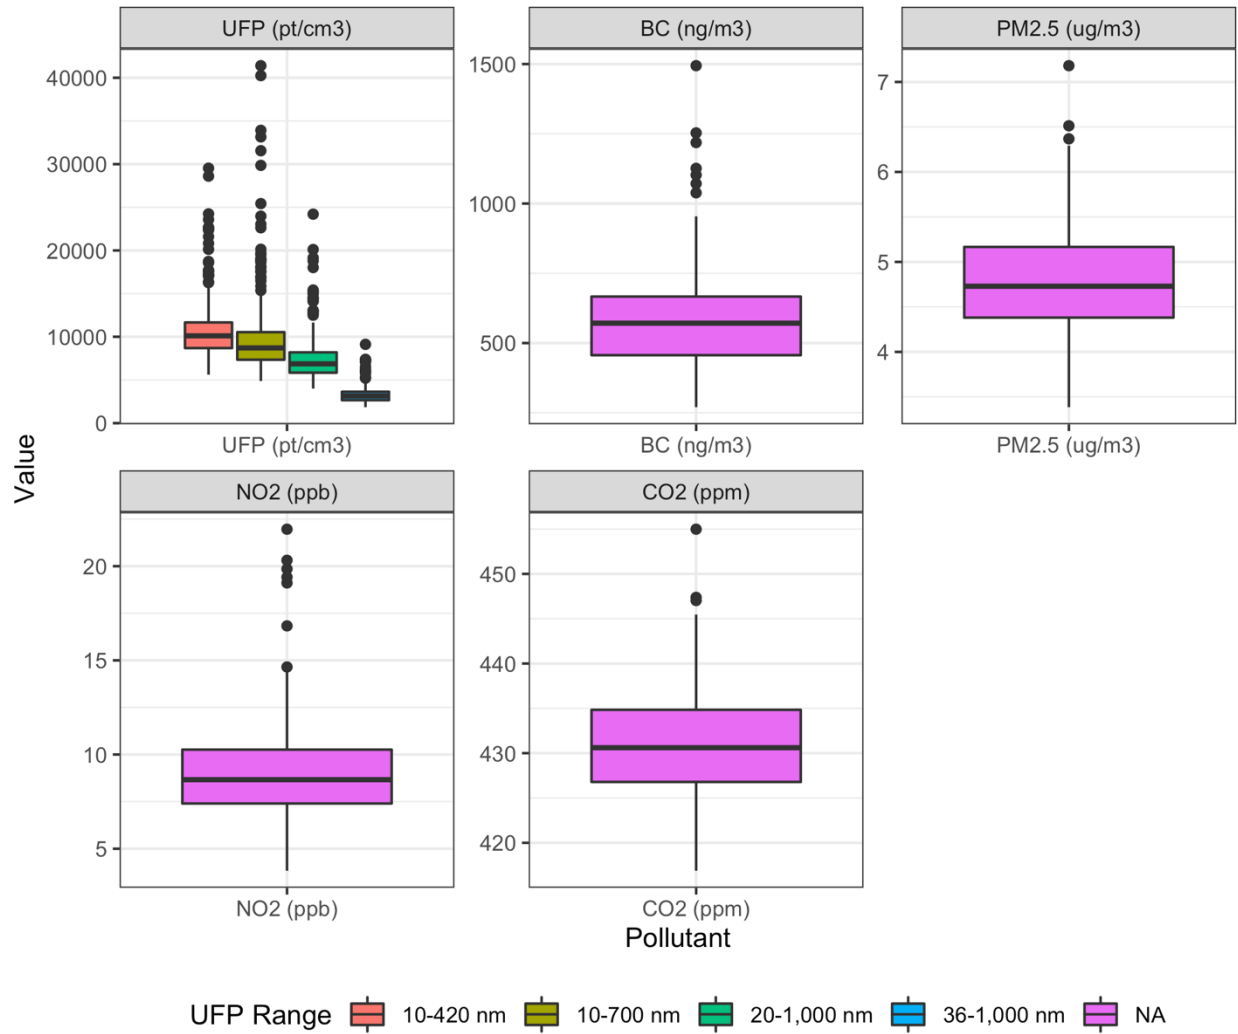

Figure S14. Annual average site concentrations (N=309). Boxplots are traditional and show all of the site averages such that boxes show the 25<sup>th</sup>, 50<sup>th</sup> and 75<sup>th</sup> quantile (Q); whiskers show a 1.5\*(Q75-Q25) distance away from the 25<sup>th</sup> or 75<sup>th</sup> quantile, and dots are outliers.

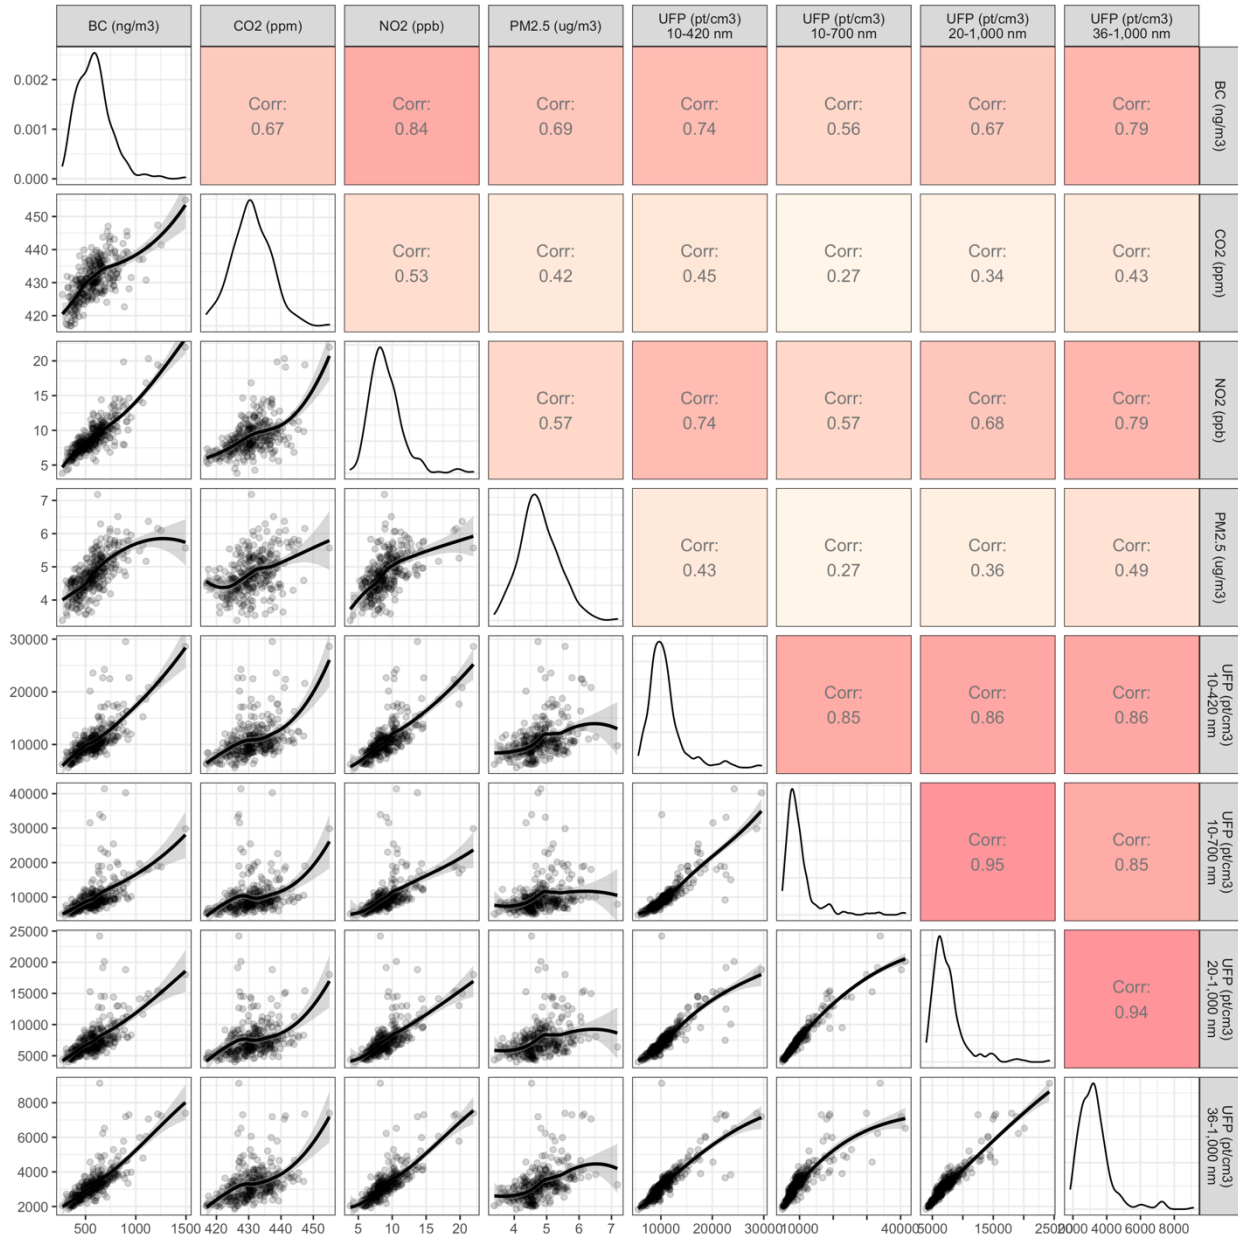

Figure S15. Annual average pollutant correlations ( $N=309$  sites). Lower panels show scatterplots with loess lines and 95% confidence intervals; upper panels show Pearson correlations ( $R$ ), with higher values in darker reds; diagonal panels show density plots.

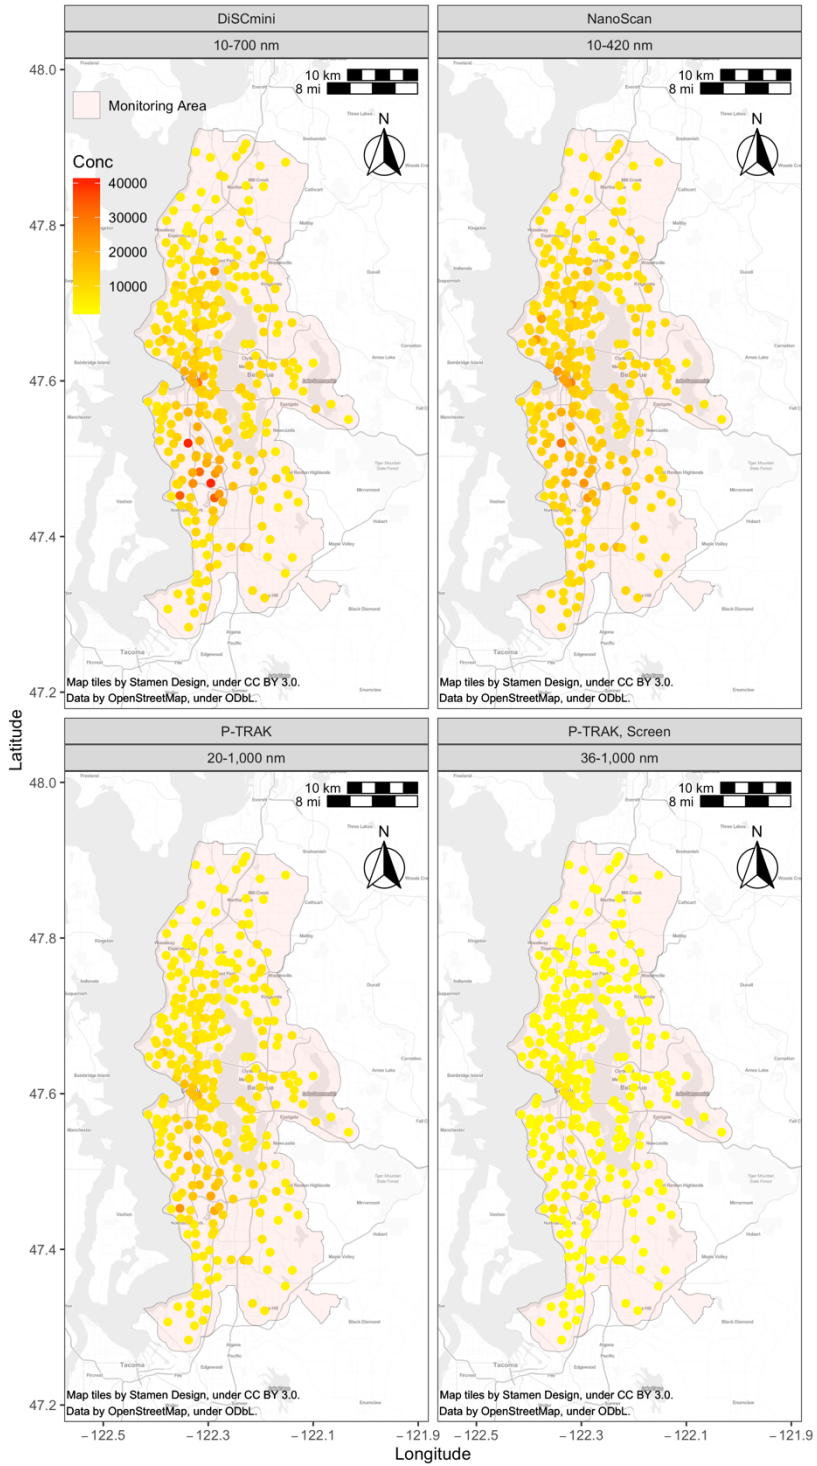

Figure S16. Annual average total UFP concentrations at monitoring sites ( $N=309$ ) for different UFP measures.

Table S10. Available geographic covariates (geocovariates) at monitoring and cohort locations.

|    | <b>Category</b>         | <b>Covariate</b> | <b>Available<br/>Buffer Sizes</b>                  | <b>Description</b>                                                                                                        |
|----|-------------------------|------------------|----------------------------------------------------|---------------------------------------------------------------------------------------------------------------------------|
| 1  | airports                | log_m_to_airp    | NA                                                 | log meters to closest airport                                                                                             |
| 2  | airports                | log_m_to_l_airp  | NA                                                 | log meters to closest large airport                                                                                       |
| 3  | coast                   | log_m_to_coast   | NA                                                 | log meters to closest coastline                                                                                           |
| 4  | commercial and services | log_m_to_comm    | NA                                                 | log meters to closest commercial and services area                                                                        |
| 5  | elevation               | elev_above       | 1000, 5000                                         | number of points (out of 24) more than 20 m and 50 m uphill of a location for a 1000 m and 5000 m buffer, respectively    |
| 6  | elevation               | elev_at_elev     | 1000, 5000                                         | number of points (out of 24) within 20 m and 50 m of the location' elevation for a 1000 m and 5000 m buffer, respectively |
| 7  | elevation               | elev_below       | 1000, 5000                                         | number of points (out of 24) more than 20 m and 50 m downhill of a location for a 1000 m and 5000 m buffer, respectively  |
| 8  | elevation               | elev_elevation   | NA                                                 | elevation above sea level in meters                                                                                       |
| 9  | elevation               | elev_stdev       | 1000, 5000                                         | standard deviation of elevation of 20 points surrounding the location                                                     |
| 10 | imperviousness          | imp_a            | 50, 100, 150, 300, 400, 500, 750, 1000, 3000, 5000 | average imperviousness                                                                                                    |

|    |          |                     |                                                             |                                                                                                                                       |
|----|----------|---------------------|-------------------------------------------------------------|---------------------------------------------------------------------------------------------------------------------------------------|
| 11 | land use | rlu_barren_p        | 1000                                                        | proportion of barren land                                                                                                             |
| 12 | land use | rlu_decid_forest_p  | 300, 400, 500,<br>750, 1000                                 | proportion of deciduous forest                                                                                                        |
| 13 | land use | rlu_dev_hi_p        | 100, 150, 300,<br>400, 500, 750,<br>1000, 3000, 5000        | proportion of highly developed land<br>(e.g., commercial and services;<br>industrial; transportation,<br>communication and utilities) |
| 14 | land use | rlu_dev_lo_p        | 50, 100, 150,<br>300, 400, 500,<br>750, 1000, 3000,<br>5000 | proportion of low developed land<br>(e.g., residential)                                                                               |
| 15 | land use | rlu_dev_med_p       | 50, 100, 150,<br>300, 400, 500,<br>750, 1000, 3000,<br>5000 | proportion of medium developed land<br>(e.g., residential)                                                                            |
| 16 | land use | rlu_dev_open_p      | 50, 100, 150,<br>300, 400, 500,<br>750, 1000, 3000,<br>5000 | proportion of developed open land                                                                                                     |
| 17 | land use | rlu_evergreen_p     | 150, 300, 400,<br>500, 750, 1000,<br>3000, 5000             | proportion of evergreen forest                                                                                                        |
| 18 | land use | rlu_herb_wetland_p  | 750, 1000                                                   | proportion of herb (nonforested)<br>wetland                                                                                           |
| 19 | land use | rlu_mix_forest_p    | 150, 300, 400,<br>500, 750, 1000,<br>3000, 5000             | proportion of mixed forest                                                                                                            |
| 20 | land use | rlu_woody_wetland_p | 750, 1000                                                   | proportion of woody wetland                                                                                                           |

---

|    |                          |                   |                                                                |                                    |
|----|--------------------------|-------------------|----------------------------------------------------------------|------------------------------------|
| 21 | NDVI                     | ndvi_q25_a        | 250, 500, 1000,<br>2500, 5000,<br>7500, 10000                  | NDVI (25th quantile)               |
| 22 | NDVI                     | ndvi_q50_a        | 250, 500, 1000,<br>2500, 5000,<br>7500, 10000                  | NDVI (50th quantile)               |
| 23 | NDVI                     | ndvi_q75_a        | 250, 500, 1000,<br>2500, 5000,<br>7500, 10000                  | NDVI (75th quantile)               |
| 24 | NDVI                     | ndvi_summer_a     | 250, 500, 1000,<br>2500, 5000,<br>7500, 10000                  | average summer time NDVI           |
| 25 | NDVI                     | ndvi_winter_a     | 250, 500, 1000,<br>2500, 5000,<br>7500, 10000                  | average winter time NDVI           |
| 26 | population               | pop10_s           | 500, 1000, 1500,<br>2000, 2500,<br>3000, 5000,<br>10000, 15000 | 2010 population density            |
| 27 | port                     | log_m_to_l_port   | NA                                                             | log meters to closest large port   |
| 28 | port                     | log_m_to_m_port   | NA                                                             | log meters to closest medium port  |
| 29 | railroads,<br>rail yards | log_m_to_rr       | NA                                                             | log meters to closest railroad     |
| 30 | railroads,<br>rail yards | log_m_to_ry       | NA                                                             | log meters to closest rail yard    |
| 31 | roads                    | intersect_a1_a3_s | 1000, 3000                                                     | number of a1-a3 road intersections |
| 32 | roads                    | intersect_a2_a2_s | 3000                                                           | number of a2-a2 road intersections |



|    |              |                          |                                                                   |                                               |
|----|--------------|--------------------------|-------------------------------------------------------------------|-----------------------------------------------|
| 33 | roads        | intersect_a2_a3_s        | 3000                                                              | number of a2-a3 road intersections            |
| 34 | roads        | intersect_a3_a3_s        | 500, 1000, 3000                                                   | number of a3-a3 road intersections            |
| 35 | roads        | ll_a1_s                  | 500, 750, 1000,<br>1500, 3000, 5000                               | length of a1 roads                            |
| 36 | roads        | ll_a23_s                 | 50, 100, 150,<br>300, 400, 500,<br>750, 1000, 1500,<br>3000, 5000 | length of a2 and a3 roads                     |
| 37 | roads        | log_m_to_a1              | NA                                                                | log meters to closest a1 road                 |
| 38 | roads        | log_m_to_a1_a1_intersect | NA                                                                | log meters to closest a1-a1 road intersection |
| 39 | roads        | log_m_to_a1_a2_intersect | NA                                                                | log_m_to_a1_a2_intersect                      |
| 40 | roads        | log_m_to_a1_a3_intersect | NA                                                                | log meters to closest a1-a3 road intersection |
| 41 | roads        | log_m_to_a123            | NA                                                                | log meters to closest a1, a2 or a3 road       |
| 42 | roads        | log_m_to_a2_a2_intersect | NA                                                                | log meters to closest a2-a2 road intersection |
| 43 | roads        | log_m_to_a2_a3_intersect | NA                                                                | log meters to closest a2-a3 road intersection |
| 44 | roads        | log_m_to_a23             | NA                                                                | log meters to closest a2 or a3 road           |
| 45 | roads        | log_m_to_a3_a3_intersect | NA                                                                | log meters to closest a3-a3 road intersection |
| 46 | truck routes | log_m_to_truck           | NA                                                                | log meters to closest truck route             |

|    |                 |                   |                                                                   |                                |
|----|-----------------|-------------------|-------------------------------------------------------------------|--------------------------------|
| 47 | truck<br>routes | tl_s              | 300, 400, 500,<br>750, 1000, 1500,<br>3000, 5000,<br>10000, 15000 | length of truck routes         |
| 48 | water           | log_m_to_waterway | NA                                                                | log meters to closest waterway |
| 49 | water           | rlu_water_p       | 500, 750, 1000,<br>3000, 5000                                     | proportion of water            |

---

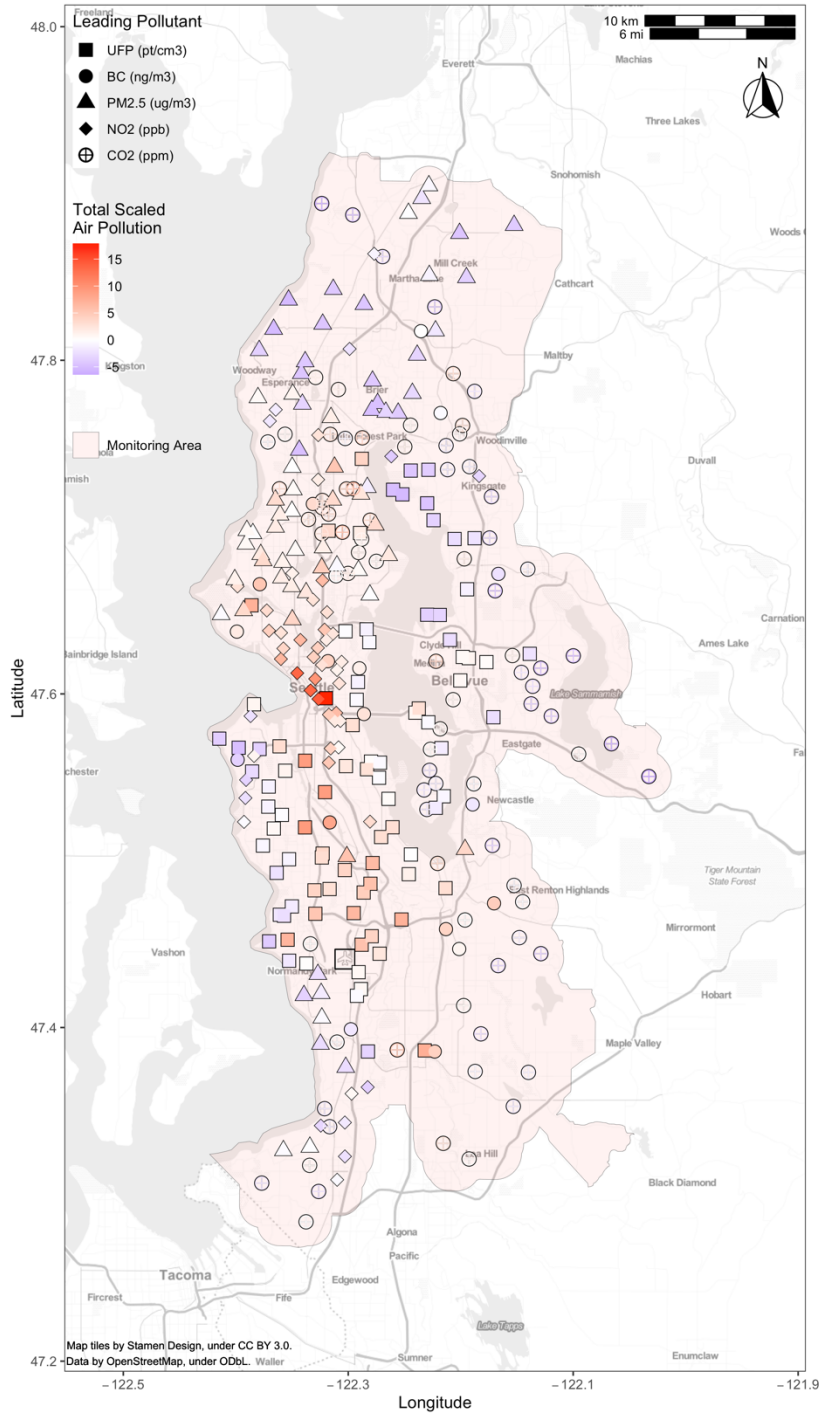

Figure S17. Annual average total scaled air pollution, defined at each site as:  $\text{Sum of scores} = \sum_{i=1}^n (x_{i,j} - \text{median}(X_i)) / \text{IQR}(X_i)$ , Where  $X$  is each individual pollutant ( $n=5$ ) and  $j$  indexes each individual pollutant measurement. Colors indicate where air pollution levels were higher or lower than the overall average (total scaled air pollution = 0). Shapes indicate the leading pollutant (highest score) at each site. UFP levels are for particles 20-1,000 nm (P-TRAK).

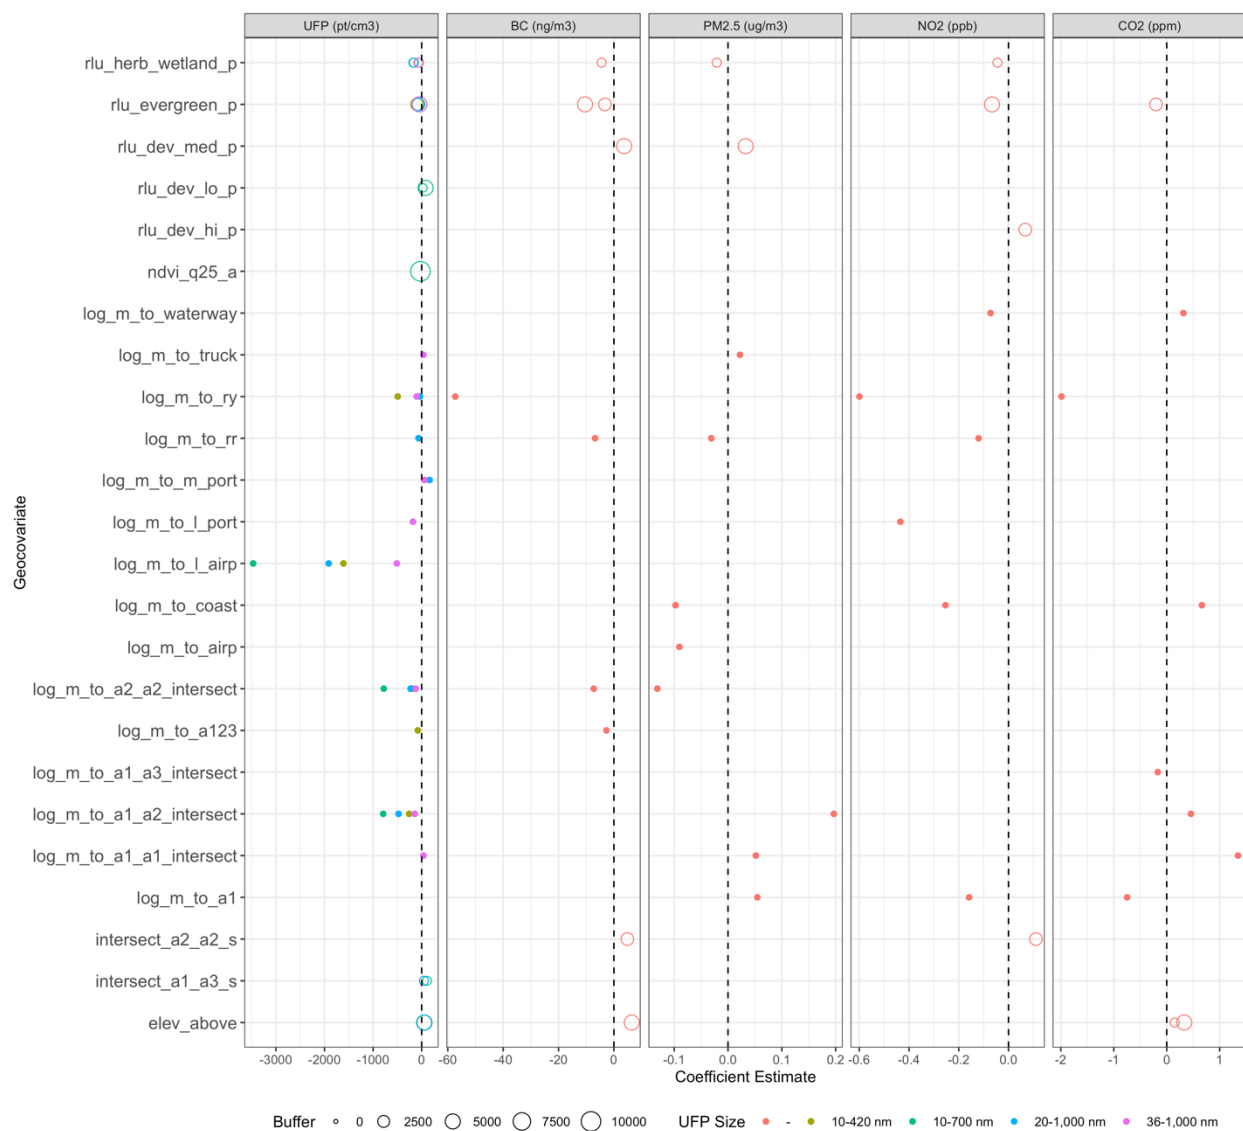

Figure S18. Lasso regression coefficient estimates for annual average pollutant concentrations. Covariates without buffer values (shown in the legend as “0” (m)) are for proximity and elevation variables rather than values for a buffered radius. Showing the top 10 covariates with the largest coefficient estimates for each pollutant. See SI Table S8 for covariate definitions.

## 2.4 Collocations at Regulatory Monitoring Sites

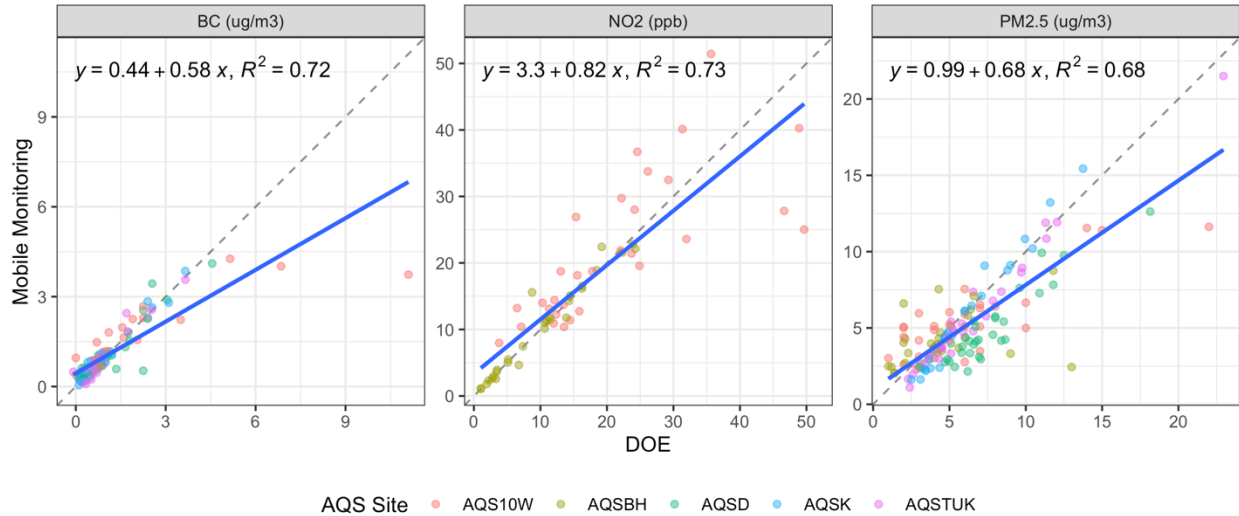

Figure S19. Comparison of two-minute median concentrations from mobile monitoring and the Department of Ecology (DOE) readings at air quality system (AQS) collocation sites. Mobile monitoring  $PM_{2.5}$  concentrations are from calibrated nephelometer readings (see Methods). DOE  $PM_{2.5}$  concentrations are from nephelometers when available (AQSD, AQSK, AQSTUK), otherwise they are from gravimetric and beta attenuation (BAM) methods, which are updated less frequently (AQS10W – readings are based on rolling 1-hour estimates updated every 6 minutes, AQSBH – readings are updated hourly).

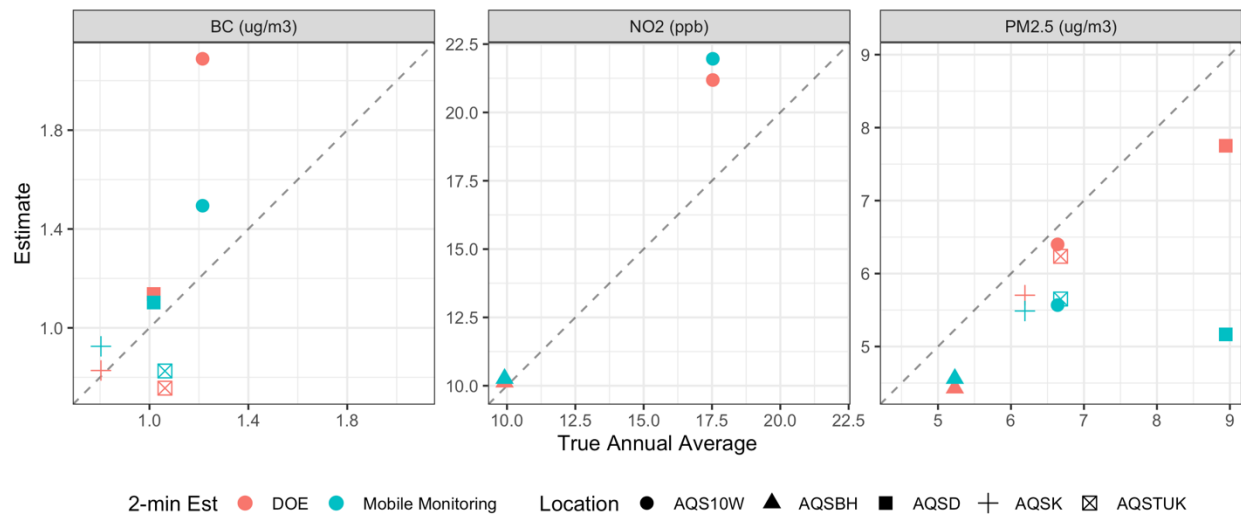

Figure S20. Comparison of annual average estimates from mobile monitoring and the Department of Ecology (DOE) readings at air quality system (AQS) collocation sites. Plots compare estimates using mobile monitoring stop data, DOE data during the same two-minute time periods, and the true annual averages at those sites using all the available regulatory monitoring data for the study period. Mobile monitoring PM<sub>2.5</sub> concentrations are from calibrated nephelometer readings (see Methods). DOE PM<sub>2.5</sub> concentrations are from nephelometers when available (AQSD, AQSK, AQSTUK), otherwise they are from gravimetric and beta attenuation (BAM) methods (AQS10W – readings are based on rolling 1-hour estimates updated every 6 minutes, AQSBH – readings are updated hourly).

### 3 References

1. US Census. TIGER/Line Shapefile, 2017, 2010 nation, U.S., 2010 Census Urban Area National. Published online 2021. Accessed April 29, 2021. <https://catalog.data.gov/dataset/tiger-line-shapefile-2017-2010-nation-u-s-2010-census-urban-area-national>
2. Esri. *ArcGIS Desktop*. Esri; 2019. <https://www.esri.com/about/newsroom/overview/?rmedium=NewsFallback&rsource=blogs.esri.com/Support/blogs/mappingcenter/archive/2010/12/03/using-and-citing-esri-data.aspx>
3. Google. *Google Maps*. Google Inc.; 2019. <https://www.maps.google.com>
4. Good N, Mölter A, Peel JL, Volckens J. An accurate filter loading correction is essential for assessing personal exposure to black carbon using an Aethalometer. *J Expo Sci Environ Epidemiol*. 2017;27(4):409-416. doi:10.1038/jes.2016.71
5. Stampfer O, Austin E, Ganuelas T, Fiander T, Seto E, Karr CJ. Use of low-cost PM monitors and a multi-wavelength aethalometer to characterize PM<sub>2.5</sub> in the Yakama Nation reservation. *Atmos Environ*. 2020;224:117292. doi:10.1016/j.atmosenv.2020.117292
6. Anderson TL, Ogren JA. Determining aerosol radiative properties using the TSI 3563 integrating nephelometer. *Aerosol Sci Technol*. 1998;29(1):57-69.
7. Hibbert DB. The uncertainty of a result from a linear calibration. *Analyst*. 2006;131(12):1273-1278.
8. Tellinghuisen J. Inverse vs. classical calibration for small data sets. *Fresenius J Anal Chem*. 2000;368(6):585-588. doi:10.1007/s002160000556
9. Austin E, Xiang J, Gould TR, et al. Distinct Ultrafine Particle Profiles Associated with Aircraft and Roadway Traffic. *Environ Sci Technol*. 2021;55(5):2847-2858. doi:10.1021/acs.est.0c05933
10. Oracle Corporation. *MySQL*.; 2021. <https://dev.mysql.com>
11. R Core Team. R: A Language and Environment for Statistical Computing. R Foundation for Statistical Computing. Published 2019. <https://www.r-project.org>
12. Robinson D, Hayes A. *Broom: Convert Statistical Analysis Objects into Tidy Tibbles*.; 2020. <https://CRAN.R-project.org/package=broom>
13. Zeileis A, Fisher JC, Hornik K, et al. *Colorspace: A Toolbox for Manipulating and Assessing Colors and Palettes*. arXiv.org E-Print Archive; 2019. <http://arxiv.org/abs/1903.06490>

14. Wilke CO. *Cowplot: Streamlined Plot Theme and Plot Annotations for “Ggplot2.”*; 2019. <https://CRAN.R-project.org/package=cowplot>
15. Wickham H, François R, Henry L, Müller K. *Dplyr: A Grammar of Data Manipulation.*; 2021. <https://CRAN.R-project.org/package=dplyr>
16. Nakazawa M. *Fmsb: Functions for Medical Statistics Book with Some Demographic Data.*; 2021. <https://CRAN.R-project.org/package=fmsb>
17. Wickham H. *Forcats: Tools for Working with Categorical Variables (Factors).*; 2020. <https://CRAN.R-project.org/package=forcats>
18. Schloerke B, Cook D, Larmarange J, et al. *GGally: Extension to “Ggplot2.”*; 2021. <https://CRAN.R-project.org/package=GGally>
19. Kahle D, Wickham H. ggmap: Spatial Visualization with ggplot2. *R J.* 2013;5(1):144-161.
20. Wickham H. *Ggplot2: Elegant Graphics for Data Analysis.* Springer-Verlag New York; 2016. <https://ggplot2.tidyverse.org>
21. Aphalo PJ. *Ggpmisc: Miscellaneous Extensions to “Ggplot2.”*; 2021. <https://CRAN.R-project.org/package=ggpmisc>
22. Aphalo PJ. *Ggpp: Grammar Extensions to “Ggplot2.”*; 2021. <https://CRAN.R-project.org/package=ggpp>
23. Kassambara A. *Ggpubr: “ggplot2” Based Publication Ready Plots.*; 2020. <https://CRAN.R-project.org/package=ggpubr>
24. Slowikowski K. *Ggrepel: Automatically Position Non-Overlapping Text Labels with “Ggplot2.”*; 2019. <https://CRAN.R-project.org/package=ggrepel>
25. Dunnington D. *Ggspatial: Spatial Data Framework for Ggplot2.*; 2020. <https://CRAN.R-project.org/package=ggspatial>
26. Pebesma E, Graeler B. *Gstat: Spatial and Spatio-Temporal Geostatistical Modelling, Prediction and Simulation.*; 2021. <https://CRAN.R-project.org/package=gstat>
27. Zhu H. *KableExtra: Construct Complex Table with “kable” and Pipe Syntax.*; 2019. <https://CRAN.R-project.org/package=kableExtra>
28. Xie Y. *Knitr: A General-Purpose Package for Dynamic Report Generation in R.*; 2020. <https://CRAN.R-project.org/package=knitr>
29. Grolemund G, Wickham H. Dates and Times Made Easy with lubridate. *J Stat Softw.* 2011;40(3):1-25.
30. Bache SM, Wickham H. *Magrittr: A Forward-Pipe Operator for R.*; 2014. <https://CRAN.R-project.org/package=magrittr>



31. Henry L, Wickham H. *Purrr: Functional Programming Tools.*; 2019. <https://CRAN.R-project.org/package=purrr>
32. Wickham H, Hester J, Francois R. *Readr: Read Rectangular Text Data.*; 2018. <https://CRAN.R-project.org/package=readr>
33. Pebesma E. *Sf: Simple Features for R.*; 2020. <https://CRAN.R-project.org/package=sf>
34. Bivand R, Nowosad J, Lovelace R. *SpData: Datasets for Spatial Analysis.*; 2021. <https://CRAN.R-project.org/package=spData>
35. Wickham H. *Stringr: Simple, Consistent Wrappers for Common String Operations.*; 2019. <https://CRAN.R-project.org/package=stringr>
36. Müller K, Wickham H. *Tibble: Simple Data Frames.*; 2021. <https://CRAN.R-project.org/package=tibble>
37. Wickham H, Henry L. *Tidyr: Tidy Messy Data.*; 2020. <https://CRAN.R-project.org/package=tidyr>
38. Wickham H, Averick M, Bryan J, et al. Welcome to the tidyverse. *J Open Source Softw.* 2019;4(43):1686. doi:10.21105/joss.01686
39. Pebesma E, Mailund T, Kalinowski T. *Units: Measurement Units for R Vectors.*; 2020. <https://CRAN.R-project.org/package=units>
40. Schuetzenmeister A, Dufey F. *VCA: Variance Component Analysis.*; 2019. <https://CRAN.R-project.org/package=VCA>
41. Stamen Design. Published 2021. <http://maps.stamen.com/#terrain/12/37.7707/-122.3783>
42. Creative Commons. Attribution 3.0 Unprotected (CC BY 3.0). Published 2021. <https://creativecommons.org/licenses/by/3.0/>
43. OpenStreetMap contributors. Published 2021. <https://www.openstreetmap.org/copyright>
