# Supplementary material for: Characterization of annual average traffic-related air pollution levels (particle number, black carbon, nitrogen dioxide, PM2.5, carbon dioxide) in the greater Seattle area from a year-long mobile monitoring campaign
Source: bioRxiv or medRxiv preprint supplement (doi:10.1101/2021.09.18.21263522), 2022-02-14
Supplement: Supplementary file [file media-1.pdf]

## Supplementary Information

### **Characterization of annual average traffic-related air pollution levels (particle number, black carbon, nitrogen dioxide, PM<sub>2.5</sub>, carbon dioxide) in the greater Seattle area from a year-long mobile monitoring campaign**

Magali N. Blanco,<sup>a</sup> Amanda Gasset,<sup>a</sup> Timothy Gould,<sup>b</sup> Annie Doubleday,<sup>a</sup> David L. Slager,<sup>a</sup> Elena Austin,<sup>a</sup> Edmund Seto,<sup>a</sup> Timothy Larson,<sup>a,b</sup> Julian Marshall,<sup>b</sup> Lianne Sheppard<sup>a,c</sup>

<sup>a</sup>Department of Environmental and Occupational Health Sciences, School of Public Health, University of Washington, Hans Rosling Center for Population Health, 3980 15th Ave NE, Seattle, WA 98195

<sup>b</sup>Department of Civil & Environmental Engineering, College of Engineering, University of Washington, 201 More Hall, Box 352700, Seattle, WA 98195

<sup>c</sup>Department of Biostatistics, School of Public Health, University of Washington, Hans Rosling Center for Population Health, 3980 15th Ave NE, Seattle, WA 98195

## Table of Contents

|           |                                                  |           |
|-----------|--------------------------------------------------|-----------|
| <b>S1</b> | <b>METHODS</b> .....                             | <b>1</b>  |
| S1.1      | STUDY DESIGN .....                               | 1         |
| S1.2      | COMPUTATION .....                                | 8         |
| S1.3      | QUALITY ASSURANCE AND QUALITY CONTROL .....      | 9         |
| S1.4      | PREDICTION MODELS .....                          | 16        |
| <b>S2</b> | <b>RESULTS</b> .....                             | <b>22</b> |
| S2.1      | SITE VISITS .....                                | 22        |
| S2.2      | COLLOCATIONS AT REGULATORY MONITORING SITES..... | 29        |
| S2.3      | SPATIAL AND TEMPORAL VARIABILITY .....           | 31        |
| S2.4      | ANNUAL AVERAGES .....                            | 32        |
| <b>S3</b> | <b>DISCUSSION</b> .....                          | <b>41</b> |
| <b>S4</b> | <b>REFERENCES</b> .....                          | <b>43</b> |

## List of Tables

|           |                                                                                                                                                                                                |    |
|-----------|------------------------------------------------------------------------------------------------------------------------------------------------------------------------------------------------|----|
| TABLE S1. | ROUTE STATISTICS.....                                                                                                                                                                          | 3  |
| TABLE S2. | AIR POLLUTANTS AND OTHER PARAMETERS MEASURED WITH MOBILE MONITORING. ....                                                                                                                      | 5  |
| TABLE S3. | DISTRIBUTION OF CALIBRATION CURVE COEFFICIENT ESTIMATES.....                                                                                                                                   | 12 |
| TABLE S4. | DISTRIBUTION OF TEMPERATURE AND RELATIVE HUMIDITY CONDITIONS INSIDE THE MANIFOLD DURING SITE VISITS (N=9,047 TOTAL). A .....                                                                   | 15 |
| TABLE S5. | COLLOCATION REGULATORY SITES AND SIMILAR PARAMETERS MEASURED.A .....                                                                                                                           | 15 |
| TABLE S6. | AVAILABLE GEOGRAPHIC COVARIATES (GEOCOVARIATES) USED IN UK-PLS MODELS. ....                                                                                                                    | 17 |
| TABLE S7. | ORIGINAL AND FINAL MOBILE MONITORING STOP MEASUREMENTS (~2 MIN EACH). ....                                                                                                                     | 23 |
| TABLE S8. | DISTRIBUTION OF WINSORIZED MEDIAN SITE VISIT CONCENTRATIONS (N = 309 SITES x ~ 29 VISITS/SITE). ....                                                                                           | 24 |
| TABLE S9. | OUT-OF-SAMPLE (OOS) MODEL PERFORMANCES FOR ANNUAL AVERAGE PREDICTION MODELS AT CROSS-VALIDATION (CV; N=278) AND TEST (N=31) SITES. THE MEAN OF WINSORIZED MEDIANS IS THE PRIMARY ANALYSIS..... | 37 |

## List of Figures

|            |                                                                                                                                                                                                                                                                                                                                                                                                                                                                               |   |
|------------|-------------------------------------------------------------------------------------------------------------------------------------------------------------------------------------------------------------------------------------------------------------------------------------------------------------------------------------------------------------------------------------------------------------------------------------------------------------------------------|---|
| FIGURE S1. | COVARIATE DISTRIBUTIONS OF MOBILE MONITORING STOPS (N=309) AND ACT COHORT LOCATIONS (N=10,330). A1 AND A2 ROADS ARE PRIMARY ROADS WITH AND WITHOUT LIMITED ACCESS, RESPECTIVELY (E.G., INTERSTATE HIGHWAYS ARE A1, SOME US AND STATE HIGHWAYS ARE A2).....                                                                                                                                                                                                                    | 2 |
| FIGURE S2. | MEAN PERCENT ERROR ( $(\text{ESTIMATED\_CONC} - \text{TRUE\_CONC})/\text{TRUE\_CONC} * 100$ ) IN THE ESTIMATED NITROGEN MONOXIDE (NO) AND NITROGEN DIOXIDE (NO <sub>2</sub> ) ANNUAL AVERAGE AT THE 10TH & WELLER (AQS10W; NEAR-ROAD SITE) AND BEACON HILL (AQSBH; BACKGROUND SITE) REGULATORY SITES FROM REPEATED SHORT-TERM RANDOM SAMPLES (2- AND 60-MIN), WHEN COMPARED TO THE “TRUE” ANNUAL AVERAGE ESTIMATED FROM ALL THE AVAILABLE 2019 DATA. ESTIMATES ARE FOR 10,000 |   |

SIMULATIONS OF RANDOM SAMPLING WITHOUT REPLACEMENT. THE BLUE VERTICAL LINE IS FOR 25 REPEAT VISITS. NO<sub>2</sub> WAS USED IN THIS SIMULATION BECAUSE IT IS A QUICK DECAYING POLLUTANT REPRESENTATIVE OF VARIOUS OTHER TRAPS (E.G., PNC, BC). NO<sub>2</sub> IS WHAT WE MEASURED IN OUR CAMPAIGN AND A SLOWER DECAYING POLLUTANT. .... 4

FIGURE S3. IN-VEHICLE CONFIGURATION ..... 7

FIGURE S4. MANIFOLD SCHEMATICS ..... 8

FIGURE S5. PARTICLE INSTRUMENT (Y-AXIS) RESPONSES TO FILTERED AIR CONCENTRATIONS (X-AXIS; NEAR 0 PT/CM<sup>3</sup>). DOTS SHOW MEDIAN, TWO-MINUTE INSTRUMENT READINGS. RED LINES ARE “LOW” AMBIENT CONCENTRATION REFERENCES, BASED ON THE 5<sup>TH</sup> QUANTILE OF STOP CONCENTRATIONS FOR EACH POLLUTANT. .... 13

FIGURE S6. COMPARISON OF TWO-MINUTE MEDIAN STOP CONCENTRATIONS FROM INSTRUMENT COLLOCATIONS. GAS VALUES ARE POST CALIBRATION. .... 14

FIGURE S7. NUMBER OF SITE VISITS PER TIME PERIOD. SHOWING PNC DATA, THOUGH ALL INSTRUMENTS WERE SIMILAR. .... 22

FIGURE S8. DISTRIBUTION OF WINSORIZED MEDIAN SITE VISIT CONCENTRATIONS BY SEASON. BOXES SHOW THE 25<sup>TH</sup>, 50<sup>TH</sup> AND 75<sup>TH</sup> QUANTILES; WHISKERS SHOW THE 5<sup>TH</sup> AND 95<sup>TH</sup> QUANTILES. THE “NA” PNC LEGEND VALUE REFERS TO POLLUTANTS OTHER THAN PNC..... 25

FIGURE S9. DISTRIBUTION OF WINSORIZED MEDIAN SITE VISIT CONCENTRATIONS BY DAY OF THE WEEK. BOXES SHOW THE 25<sup>TH</sup>, 50<sup>TH</sup> AND 75<sup>TH</sup> QUANTILES; WHISKERS SHOW THE 5<sup>TH</sup> AND 95<sup>TH</sup> QUANTILES. THE “NA” PNC LEGEND VALUE REFERS TO POLLUTANTS OTHER THAN PNC. .... 26

FIGURE S10. DISTRIBUTION OF WINSORIZED MEDIAN SITE VISIT CONCENTRATIONS BY HOUR OF THE DAY. BOXES SHOW THE 25<sup>TH</sup>, 50<sup>TH</sup> AND 75<sup>TH</sup> QUANTILES; WHISKERS SHOW THE 5<sup>TH</sup> AND 95<sup>TH</sup> QUANTILES..... 27

FIGURE S11. SITE-SPECIFIC CONCENTRATIONS OVER THE COURSE OF THE STUDY. THIN LINES SHOW SITE-SPECIFIC SMOOTH (LOESS) FITS FOR WINSORIZED MEDIAN VISIT CONCENTRATIONS (N~29 VISITS/SITE). BLACK LINES SHOW THE OVERALL SMOOTH TRENDS FOR ALL THE SITES. .... 28

FIGURE S12. COMPARISON OF TWO-MINUTE MEDIAN CONCENTRATIONS FROM MOBILE MONITORING AND THE DEPARTMENT OF ECOLOGY (DOE) READINGS AT AIR QUALITY SYSTEM (AQS) COLLOCATION SITES. MSE-BASED R<sup>2</sup>: BC = 0.69, NO<sub>2</sub> = 0.71, PM<sub>2.5</sub> = 0.61. THE DASHED LINE IS THE 1-1 LINE; THE BLUE LINE IS THE LEAST SQUARES LINEAR REGRESSION FIT. MOBILE MONITORING PM<sub>2.5</sub> CONCENTRATIONS ARE FROM CALIBRATED NEPHELOMETER READINGS (SEE METHODS). DOE PM<sub>2.5</sub> CONCENTRATIONS ARE FROM NEPHELOMETERS WHEN AVAILABLE (AQSD, AQSK, AQSTUK – READINGS ARE UPDATED EVERY MINUTE), OTHERWISE THEY ARE FROM GRAVIMETRIC AND BETA ATTENUATION (BAM) METHODS, WHICH ARE UPDATED LESS FREQUENTLY (AQSD10W – READINGS ARE BASED ON ROLLING 1-HOUR ESTIMATES UPDATED EVERY 6 MINUTES, AQSBH – READINGS ARE UPDATED HOURLY). .... 29

FIGURE S13. COMPARISON OF TRUE ANNUAL AVERAGE POLLUTANT ESTIMATES AT AIR QUALITY SYSTEM (AQS) COLLOCATION SITES TO ANNUAL AVERAGE ESTIMATES FROM REPEATED 2-MIN MEASURES FROM MOBILE MONITORING AND THE DEPARTMENT OF ECOLOGY (DOE). PLOTS COMPARE ESTIMATES USING MOBILE MONITORING STOP DATA, DOE DATA DURING THE SAME TWO-MINUTE TIME PERIODS, TO THE TRUE ANNUAL AVERAGES AT THOSE SITES USING ALL THE AVAILABLE REGULATORY MONITORING DATA FOR THE STUDY PERIOD. .... 30

FIGURE S14. PERCENT OF WINSORIZED MEDIAN VISIT CONCENTRATION VARIABILITY EXPLAINED BY SPATIAL, TEMPORAL AND WITHIN SITE FACTORS FOR EACH POLLUTANT (TOTAL = 100%). POLLUTANT VALUES ARE BASED ON SEPARATE ANALYSIS OF VARIANCE (ANOVA) MODELS. SPATIAL VARIABILITY IS THE CONCENTRATION VARIABILITY ACROSS 309 SITES. THE RESIDUAL ERROR TERM REPRESENTS WITHIN-SITE VARIABILITY ACROSS APPROXIMATELY 29 VISITS PER SITE..... 31

FIGURE S15. ANNUAL AVERAGE SITE CONCENTRATIONS FROM WINSORIZED MEDIAN VISIT CONCENTRATION (N=309). THE “NA” PNC LEGEND VALUE REFERS TO POLLUTANTS OTHER THAN PNC. .... 32

FIGURE S16. ANNUAL AVERAGE PM<sub>2.5</sub>, BC, NO<sub>2</sub> AND CO<sub>2</sub> CONCENTRATIONS AT MONITORING SITES (N=309). .... 33

FIGURE S17. ANNUAL AVERAGE PNC CONCENTRATIONS AT MONITORING SITES (N=309) FROM DIFFERENT PNC INSTRUMENTS. .... 34

FIGURE S18. PLS LOADINGS FOR POLLUTANT MODELS. PNC RESULTS ARE FROM THE PRIMARY INSTRUMENT, THE P-TRAK. .... 35

FIGURE S19. UK-PLS MODEL PREDICTIONS OF ANNUAL AVERAGE POLLUTANT CONCENTRATIONS. DASHED LINES INDICATE THE 1-1 LINE, AS WELL AS 25% ABOVE AND BELOW (NOTE THAT CO<sub>2</sub> HAS A NARROW RANGE). THE BLUE LINE SHOWS THE BEST FIT LINE. .... 36

FIGURE S20. UK-PLS POLLUTANT PREDICTIONS WITHIN THE MONITORING REGION FOR ALL PNC INSTRUMENTS. THE P-TRAK IS THE PRIMARY PNC INSTRUMENT..... 39

FIGURE S21. ANNUAL AVERAGE POLLUTANT PREDICTION CORRELATIONS (N=309 SITES). LOWER PANELS SHOW SCATTERPLOTS WITH LOESS LINES AND 95% CONFIDENCE INTERVALS; UPPER PANELS SHOW PEARSON CORRELATIONS (R), WITH HIGHER VALUES IN DARKER REDS; DIAGONAL PANELS SHOW DENSITY PLOTS. .... 40

FIGURE S22. SAMPLING APPROACHES ACROSS OUR AND OTHER PNC STUDIES.<sup>46-69</sup> STUDIES ARE STRATIFIED BY WHETHER THE SAMPLING TYPE WAS TRADITIONAL, FIXED SITE SAMPLING (LONG-TERM STATIONARY), SHORT-TERM MOBILE MONITORING CAMPAIGNS THAT COLLECTED ON-ROAD DATA WHILE IN MOTION (SHORT-TERM NON-STATIONARY), OR SHORT-TERM MOBILE MONITORING

CAMPAIGNS THAT COLLECTED DATA WHILE STOPPED (SHORT-TERM STATIONARY). FIGURE DOES NOT INCLUDE SAHA ET AL. (2021), WHO USED A MIXED SAMPLING APPROACH FOR PNC FROM MULTIPLE SOURCES.<sup>70</sup> NOTE THAT LITTLE DATA WERE AVAILABLE FOR SHORT-TERM NON-STATIONARY STUDIES REGARDING VISIT DURATION, TOTAL SITE DURATION OR VISITS PER SITE. THE SINGLE STUDY UNDER SHORT-TERM NON-STATIONARY VISIT DURATION OF ~ 8 MIN WAS CONDUCTED WITH PEDESTRIANS (SABALIAUSKAS ET AL. 2015) ..... 41

FIGURE S23 SAMPLING APPROACHES ACROSS OTHER BC STUDIES.<sup>46,51,56,61,62,71-81</sup> STUDIES ARE STRATIFIED BY WHETHER THE SAMPLING TYPE WAS TRADITIONAL, FIXED SITE SAMPLING (LONG-TERM STATIONARY), SHORT-TERM MOBILE MONITORING CAMPAIGNS THAT COLLECTED ON-ROAD DATA WHILE IN MOTION (SHORT-TERM NON-STATIONARY), OR SHORT-TERM MOBILE MONITORING CAMPAIGNS THAT COLLECTED DATA WHILE STOPPED (SHORT-TERM STATIONARY). NOTE THAT LITTLE DATA WERE AVAILABLE FOR SHORT-TERM NON-STATIONARY STUDIES REGARDING VISIT DURATION, TOTAL SITE DURATION OR VISITS PER SITE. .... 42

**List of Equations**

EQUATION S1. NEPHELOMETER LIGHT SCATTERING (BSCAT, M-1) CALIBRATION CURVE FOR PM<sub>2.5</sub>. WE FIT THIS MODEL USING REGULATORY MONITORING DATA BETWEEN 1998-2017. DAILY AVERAGE MEASUREMENTS FROM NINE NON-INDUSTRIAL REGULATORY AIR MONITORING SITES IN THE REGION WHERE BOTH PM<sub>2.5</sub> (USING FEDERAL REFERENCE METHODS) AND NEPHELOMETER LIGHT SCATTERING DATA WERE COLLECTED WERE USED. WE EXCLUDED THE YEARS 2008-2009 DUE TO NEPHELOMETER INSTRUMENTATION ISSUES NOTED BY THE LOCAL REGULATORY AGENCY. THE MODEL’S LEAVE-ONE-SITE-OUT CROSS-VALIDATED R<sup>2</sup> AND ROOT MEAN SQUARE ERROR (RMSE) WERE 0.92 AND 1.97 µG/M<sup>3</sup>, RESPECTIVELY. .... 8

**List of Notes**

NOTE S1. SELECTING THE MONITORING LOCATIONS ..... 1

NOTE S2. ADDITIONAL DETAILS ON THE PLATFORM CONFIGURATION AND DATA COLLECTION PROCEDURES ..... 7

NOTE S3. SOFTWARE USED IN ANALYSES. .... 8

NOTE S4. QUALITY ASSURANCE AND QUALITY CONTROL PROCEDURES ..... 9

NOTE S5. GEOGRAPHIC COVARIATES ..... 16

## S1 Methods

### S1.1 Study Design

*Note S1. Selecting the monitoring locations*

We used ArcMap to select 304 participant residences within our monitoring region that maximized spatial coverage. To do so, we first created a street network in ArcMap using Tiger/Line® shapefiles downloaded from the U.S. Census Bureau.<sup>1,2</sup> These include all roads within the monitoring area. We divided the monitoring area into nine regions and selected approximately 34 participant residences within each of these regions (~34 locations/region x 9 regions = 304 total locations). These locations were meant to maximize spatial coverage by minimizing the distance between each selected location and all the nearby participant locations. The initially selected locations were jittered (using the *jitter* function in R [v 3.5.1, using RStudio v 1.0.143]) to maintain participant confidentiality, and 304 new, nearby locations were identified as monitoring locations. The resulting locations were shifted anywhere from roughly a couple of houses to several blocks over. Locations were manually moved to the nearest home if the jittering caused locations to end up in a lake, park, etc. We used Google Maps Street View<sup>3</sup> to ensure that a vehicle could safely park at each location, otherwise the stop was moved to the nearest location where it was safe to do so. We included 5 regulatory monitoring locations to obtain the final 309 monitoring locations.

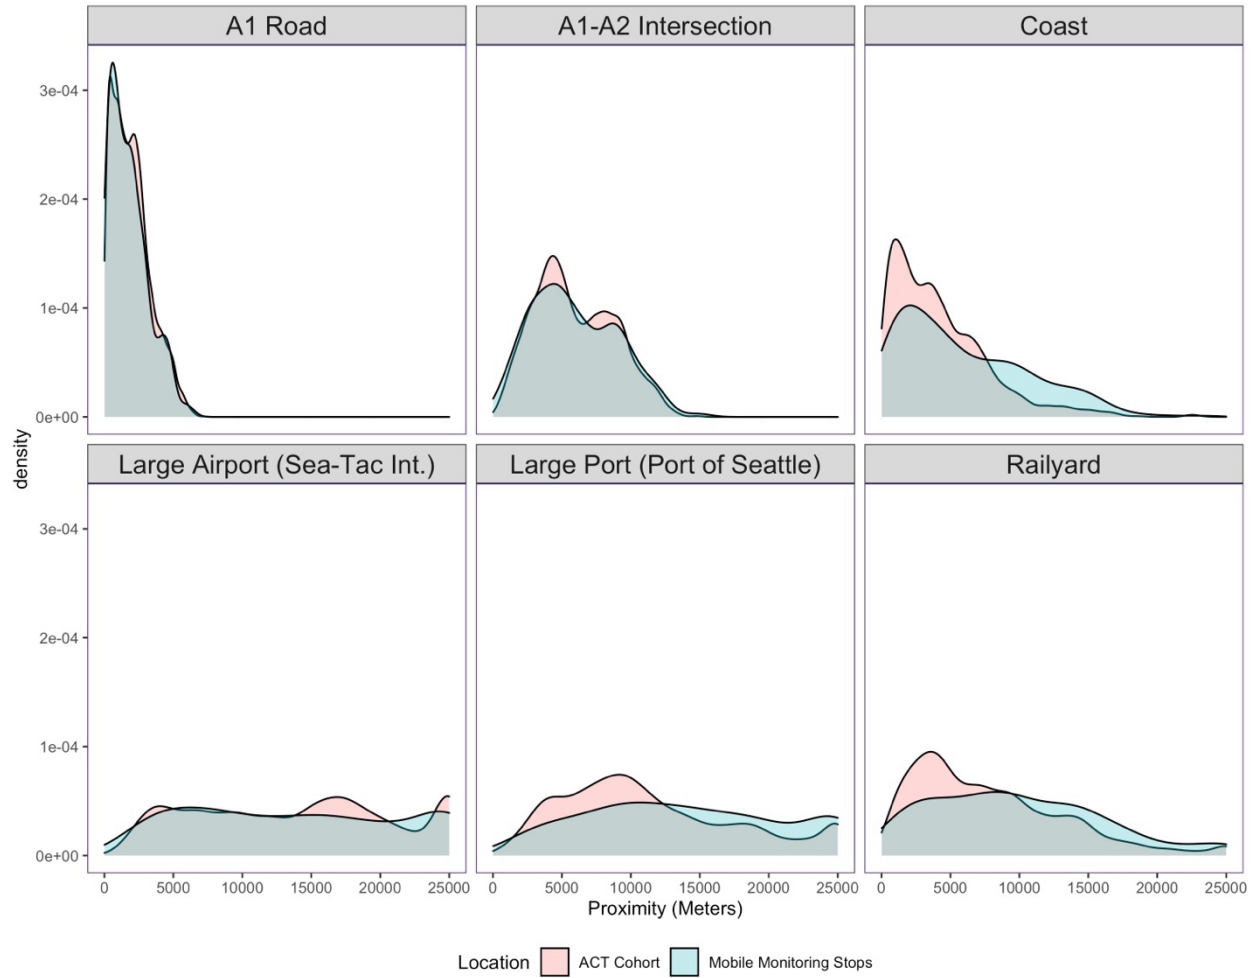

Figure S1. Covariate distributions of mobile monitoring stops ( $n=309$ ) and ACT cohort locations ( $n=10,330$ ). A1 and A2 roads are primary roads with and without limited access, respectively (e.g., interstate highways are A1, some US and state highways are A2).

Table S1. Route Statistics.

| <b>Route<sup>a</sup></b> | <b>No. Stops</b> | <b>No. Sampling Dates</b> | <b>Distance (mi)</b> | <b>Distance (km)</b> | <b>Total Distance (mi)<sup>b</sup></b> | <b>Total Distance (km)</b> | <b>Median (IQR) Drive Time (hr)</b> | <b>Total Drive Time (hr)</b> |
|--------------------------|------------------|---------------------------|----------------------|----------------------|----------------------------------------|----------------------------|-------------------------------------|------------------------------|
| 1                        | 40               | 30                        | 48                   | 78                   | 1,446                                  | 2,328                      | 5.2 (4.8, 5.7)                      | 153                          |
| 2                        | 35               | 30                        | 47                   | 75                   | 1,397                                  | 2,247                      | 4.8 (4.4, 5.1)                      | 140                          |
| 3                        | 45               | 34                        | 59                   | 95                   | 2,008                                  | 3,232                      | 5.6 (4.9, 6.1)                      | 170                          |
| 4                        | 33               | 33                        | 66                   | 107                  | 2,190                                  | 3,525                      | 5.0 (4.7, 5.3)                      | 143                          |
| 5                        | 32               | 32                        | 69                   | 112                  | 2,221                                  | 3,574                      | 5.1 (4.7, 5.5)                      | 143                          |
| 6                        | 35               | 32                        | 88                   | 142                  | 2,829                                  | 4,554                      | 5.4 (4.9, 5.8)                      | 141                          |
| 7                        | 32               | 30                        | 90                   | 145                  | 2,697                                  | 4,341                      | 5.6 (5.2, 6.1)                      | 163                          |
| 8                        | 28               | 32                        | 104                  | 168                  | 3,332                                  | 5,362                      | 5.7 (5.2, 6.1)                      | 156                          |
| 9                        | 29               | 35                        | 92                   | 148                  | 3,227                                  | 5,193                      | 5.5 (5.0, 5.8)                      | 158                          |
| Total                    | 309              | 35                        | 664                  | 1,069                | 21,347                                 | 34,355                     | 5.2 (4.8, 5.8)                      | 1,367                        |

<sup>a</sup> There were about 18 additional make-up drives (about 4-5 per quarter), each with stops from multiple routes.

<sup>b</sup> Total route driving distance is estimated from the route distance and the number of sampling dates. The exact distance varied based on make-up drive, route deviations, etc.

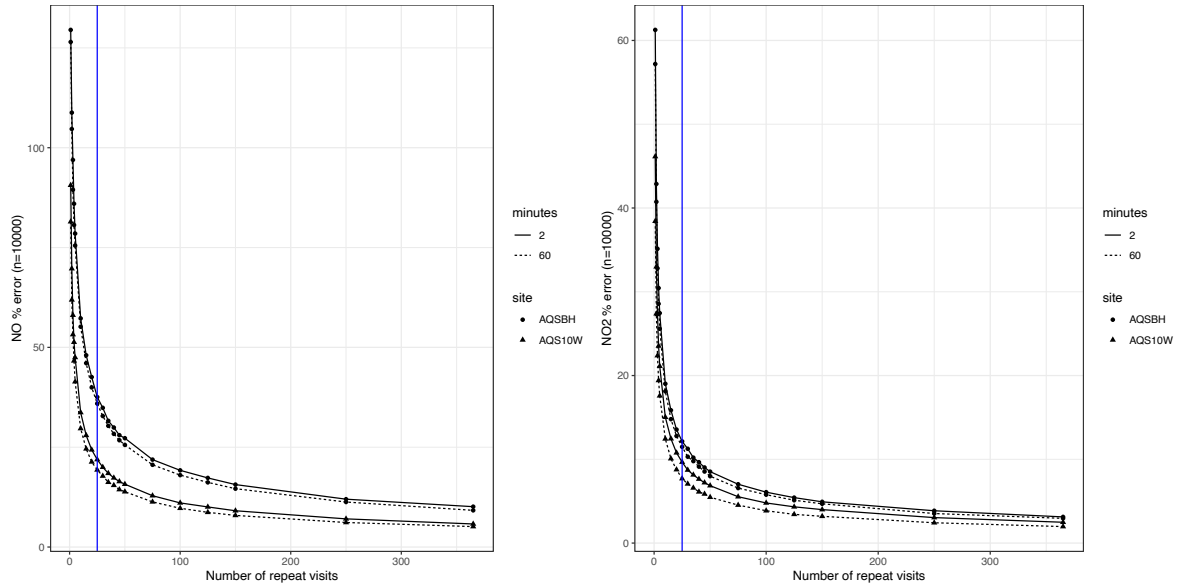

Figure S2. Mean percent error ( $(\text{estimated\_conc} - \text{true\_conc}) / \text{true\_conc} * 100$ ) in the estimated nitrogen monoxide (NO) and nitrogen dioxide (NO<sub>2</sub>) annual average at the 10th & Weller (AQS10W; near-road site) and Beacon Hill (AQS10W; background site) regulatory sites from repeated short-term random samples (2- and 60-min), when compared to the “true” annual average estimated from all the available 2019 data. Estimates are for 10,000 simulations of random sampling without replacement. The blue vertical line is for 25 repeat visits. NO was used in this simulation because it is a quick decaying pollutant representative of various other TRAPs (e.g., PNC, BC). NO<sub>2</sub> is what we measured in or campaign and a slower decaying pollutant.



Table S2. Air pollutants and other parameters measured with mobile monitoring.

| Parameter                                                | Instrument                              | Manufacturer               | Measurement Range                                   | Limit of Quantification                      | Time Resolution |
|----------------------------------------------------------|-----------------------------------------|----------------------------|-----------------------------------------------------|----------------------------------------------|-----------------|
| <b>Particles (pt)</b>                                    |                                         |                            |                                                     |                                              |                 |
| PNC <sup>a</sup>                                         |                                         |                            |                                                     |                                              |                 |
| 10-420 nm<br>(13-bin<br>PSD <sup>a</sup> )               | NanoScan<br>3910                        | TSI                        | 10 <sup>2</sup> -10 <sup>6</sup> pt/cm <sup>3</sup> | 10 pt/ cm <sup>3</sup>                       | 60 sec          |
| 10-700 nm                                                | DiSCmini                                | Testo                      | 10 <sup>3</sup> -0 <sup>6</sup> pt/cm <sup>3</sup>  | 500-2,000<br>pt/cm <sup>3</sup> <sup>b</sup> | 1 sec           |
| 20-1,000 nm                                              | PTRAK 8525                              | TSI                        | 0-5x10 <sup>5</sup> pt/cm <sup>3</sup>              | 1 pt/cm <sup>3</sup>                         | 1 sec           |
| 36-1,000 nm                                              | PTRAK 8525,<br>with diffusion<br>screen | TSI                        | 0-5x10 <sup>5</sup> pt/cm <sup>3</sup>              | 1 pt/cm <sup>3</sup>                         | 1 sec           |
| BC                                                       | microAeth<br>MA200                      | AethLabs                   | 0-10 <sup>6</sup> ng/m <sup>3</sup>                 | 30 ng BC/m <sup>3</sup> <sup>c</sup>         | 10 sec          |
| Light scattering<br>nephelometer<br>(PM <sub>2.5</sub> ) | M903                                    | Radiance<br>Research       | 0 - >1 km <sup>-1</sup>                             | 10 <sup>-6</sup> m <sup>-1</sup>             | 10 sec          |
| <b>Gases</b>                                             |                                         |                            |                                                     |                                              |                 |
| NO <sub>2</sub>                                          | CAPS NO <sub>2</sub>                    | Aerodyne<br>Research, Inc. | 0-2x10 <sup>3</sup> ppb                             | 2 ppbv                                       | 1 sec           |
| CO <sub>2</sub>                                          | LI-850                                  | Li-Cor                     | 0-5x10 <sup>3</sup> ppm<br>(vol)                    | 100 ppmv                                     | 1 sec           |
| CO <sup>d</sup>                                          | CO Monitor<br>T15N                      | Langan, Inc.               | 0-200 ppm                                           | 0.1 ppm                                      | 1 sec           |
| <b>Other</b>                                             |                                         |                            |                                                     |                                              |                 |

|                                  |                 |              |                   |       |       |
|----------------------------------|-----------------|--------------|-------------------|-------|-------|
| Temperature                      | Onset UX100-011 | HOBO         | -4-158°F          |       | 1 sec |
| Relative humidity                | Onset UX100-011 | HOBO         | 0-95%             |       | 1 sec |
| Positioning & real-time tracking | DG-500          | US GlobalSat | 0-515 m/sec speed | 2.5 m | 1 sec |

<sup>a</sup> PNC: particle number concentration; PSD: particle size distribution

<sup>b</sup> estimate; detection limit is dependent on particle size

<sup>c</sup> for a 5 min time base, 150 ml/min flow rate

<sup>d</sup> CO measurements were collected but not utilized because they did not meet our quality assurance standards

Instruments were in the back of the vehicle where they were powered by two rechargeable batteries and connected to gas- or particle- specific manifolds (SI Figure S3-S4). These were connected to a rooftop inlet facing the front of the car to reduce the possibility of self-contamination while in motion. Instrument clocks were all synchronized at the beginning of each drive within ~2 seconds. Instruments were started within an hour before the start of each drive and continuously run until the end of the route.

Drivers were instructed to follow the specific Google Map route directions and to take notes of any field anomalies (e.g., sampling behind a school bus or next to a construction site).

Instrument data files were uploaded to a secure data management system (MySQL) after each drive using standardized naming conventions to automate data uploads and the generation of daily data reports (see below for further details).

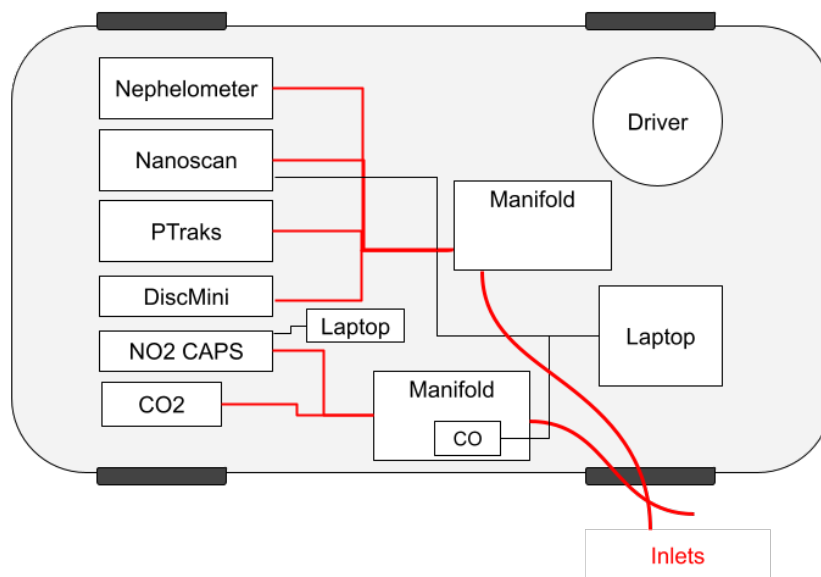

Figure S3. In-vehicle configuration

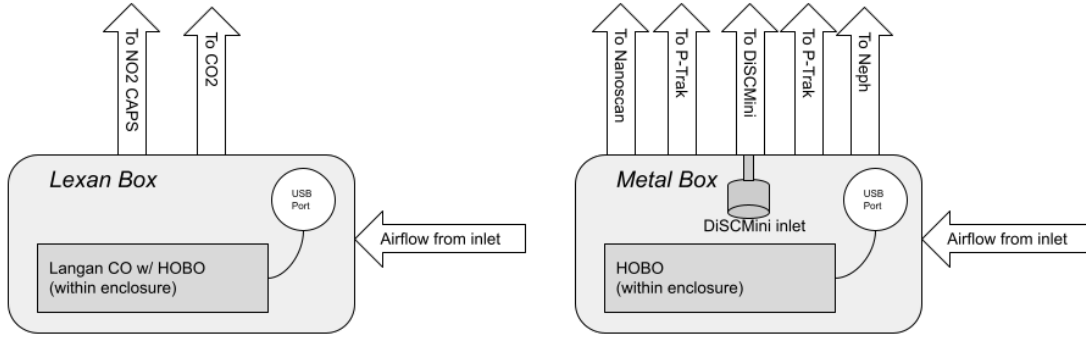

Figure S4. Manifold schematics

## S1.2 Computation

Note S3. Software used in analyses.

We conducted all analyses using MySQL<sup>4</sup> and R (v 3.6.2, using RStudio v 1.2.5033).<sup>5</sup> We used the R packages: Broom (v. 0.5.5),<sup>6</sup> colorspace (v. 1.4-1),<sup>7</sup> cowplot (v. 1.0.0),<sup>8</sup> dplyr (v. 1.0.6),<sup>9</sup> fmsb (v. 0.7.1),<sup>10</sup> forcats (v. 0.5.0),<sup>11</sup> GGally (v. 2.1.1),<sup>12</sup> ggmap (v. 3.0.0),<sup>13</sup> ggplot2 (v. 3.3.3),<sup>14(p2)</sup> ggpmisc (v. 0.4.0),<sup>15</sup> ggpp (v. 0.4.0),<sup>16</sup> ggpubr (v. 0.2.5),<sup>17</sup> ggrepel (v. 0.8.1),<sup>18</sup> ggspatial (v. 1.1.4),<sup>19</sup> gstat (v. 2.0-7),<sup>20</sup> kableExtra (v. 1.1.0),<sup>21</sup> knitr (v. 1.28),<sup>22</sup> lubridate (v. 1.7.10),<sup>23</sup> magrittr (v. 1.5),<sup>24</sup> pls (v. 0.0.1),<sup>25</sup> purrr (v. 0.3.3),<sup>26</sup> readr (v. 1.3.1),<sup>27</sup> sf (v. 0.9-5),<sup>28</sup> spData (v. 0.3.10),<sup>29</sup> stringr (v. 1.4.0),<sup>30</sup> tibble (v. 3.1.2),<sup>31</sup> tidyr (v. 1.0.2),<sup>32</sup> tidyverse (v. 1.3.0),<sup>33</sup> units (v. 0.6-7)<sup>34</sup> and VCA (v. 1.4.2).<sup>35</sup> We created all maps with map tiles by Stamen Design<sup>36</sup> under CC BY 3.0,<sup>37</sup> using data by OpenStreetMap under ODbL.<sup>38</sup>

Equation S1. Nephelometer light scattering (*bscat*, *m-1*) calibration curve for  $PM_{2.5}$ . We fit this model using regulatory monitoring data between 1998-2017. Daily average measurements from nine non-industrial regulatory air monitoring sites in the region where both  $PM_{2.5}$  (using federal reference methods) and nephelometer light scattering data were collected were used. We excluded the years 2008-2009 due to nephelometer instrumentation issues noted by the local regulatory agency. The model's leave-one-site-out cross-validated  $R^2$  and root mean square error (RMSE) were 0.92 and 1.97  $\mu\text{g}/\text{m}^3$ , respectively.

$$PM_2 \left( \frac{\mu\text{g}}{\text{m}^3} \right) = 25.10 \times 10^4 (\text{bscat}) + 1.06$$

### S1.3 Quality Assurance and Quality Control

*Note S4. Quality assurance and quality control procedures*

#### *Data Management System*

After each drive, the field technician uploaded each instrument's file to the server using a standardized file naming convention. These files were automatically loaded into a MySQL database every morning at 4 a.m. A report was produced automatically that showed the time series plot of each instrument, counts of the times of day that each stop on the route had been visited to date, and a map that highlighted any missed stops. The driver reviewed these data before starting the next day's drive. Single missed stops could be visited on the way to another day's route or on a day dedicated to make-up stops. In addition, a project manager, information technology (IT) specialist, and several data analysts routinely reviewed and worked with the data, thus allowing for additional feedback.

We carried out an extensive independent code review of the database and made further improvements to the system before completely reloading all raw data files into the database and locking the final version.

#### *Instrumentation*

To ensure instrument accuracy, all gas instruments were calibrated in our laboratory before the campaign and every few weeks thereafter. Particle instruments were purchased new and arrived with calibration certifications, or they were compared to like instruments that had been serviced prior to the study. Primary and backup instruments were collocated every few weeks on route to assess the precision (repeatability) of our measurements in different environments and over time.

#### *Data Cleaning*

We conducted various quality control procedures prior to conducting data analyses. We added a ten-second lag to all the instrument readings to account for the time required for a

volume of air to travel from the sampling inlet to each instrument. This was based on the manifold volumes and instrument flow rates.

Readings with instrument error codes were dropped. This included, for example, aethalometer (BC) pump flow errors and readings of NO<sub>2</sub> field baseline samples.

Aethalometers were checked to ensure that the filter attenuation was below 50% thus ensuring optimal instrument sensitivity at all times.<sup>39,40</sup>

Gas instruments and nephelometers (which were checked for a response against CO<sub>2</sub> gas<sup>41</sup>) were calibrated various times during the study period. CO and nephelometer instruments were automatically reset during calibrations. CO<sub>2</sub> and NO<sub>2</sub> instruments were manually calibrated using least squares linear regression models with reference concentrations as the independent variable and instrument readings as the response variable.<sup>42,43</sup> Particle instruments were checked for zero concentration responses by placing a high efficiency particle air (HEPA) filter on the instrument or manifold inlet.

We calculated stop visit medians (from about 2 minutes worth of data). Readings outside the instrument ranges, screened P-TRAK readings below 100 pt/cm<sup>3</sup>, and other PNC instrument readings below 300 pt/cm<sup>3</sup> (NanoScans, unscreened P-TRAKS) were dropped.

We investigated collocated instrument readings to assess repeatability. Comparing instruments to one another is particularly common with particle instruments since there is no standard for the field calibration of these instruments. Backup NO<sub>2</sub> (“NO2\_1”) and NanoScan (“PMSCAN\_3”) instruments were adjusted based on readings from their respective primary instruments during the beginning of the study since these were used exclusively at the beginning of the study. We calibrated PNC readings from the two DiSCmini instruments used in this study to the mean of their responses.<sup>44</sup> This was done to ensure consistency across instruments since these were equally used throughout the study period. In this approach, a calibration curve is established by fitting separate linear regression models to each instrument, with that instrument’s readings as the independent variable and the mean reading of duplicate instruments as the response variable.

The backup CO<sub>2</sub> instrument (CO2\_19) was dropped since it produced unstable responses over time, it did not always correlate well with the primary instrument (CO2\_14), and it was solely used as a collocation instrument (i.e., never on its own). All CO readings were dropped

since instruments produced unstable readings, and collocated instruments were poorly correlated with one another or observations from collocations at regulatory monitoring sites.

### *Quality Control Results Summary*

SI Table S3 shows the calibration curve coefficient estimates used to manually adjust CO and NO<sub>2</sub>.

In response to clean, filtered air, particle instruments generally reported near zero concentrations that were also lower than a “low” ambient concentration, as determined from the data (SI Figure S5). Some exceptions included the backup aethalometer (BC\_0066), which reported negative readings, though this was based on very little data (two 2-min medians). The primary aethalometer (BC\_0063) and nephelometer instruments (PM25\_176), as well as the backup DiSCmini instrument (PMDISC\_8) additionally reported low ambient concentrations that were similar to some of their filtered air responses, suggesting that these instruments may be less sensitive to very low ambient concentrations.

Collocated instruments generally produced similar responses (SI Figure S6). As noted above, the backup CO<sub>2</sub> instrument (CO2\_19) and all CO instruments were dropped because they did not meet quality assurance standards. Backup NO<sub>2</sub> and NanoScan instruments (NO2\_1, PMSCAN\_3) were adjusted to better align with primary instrument readings.

Temperature and relative humidity conditions inside the manifold during site visits are presented in SI Table S4.

Table S3. Distribution of calibration curve coefficient estimates.

| <b>Pollutant<sup>a</sup></b> | <b>Instrument ID</b> | <b>Term</b> | <b>N<sup>b</sup></b> | <b>Min</b> | <b>Median</b> | <b>Max</b> |
|------------------------------|----------------------|-------------|----------------------|------------|---------------|------------|
| NO <sub>2</sub> (ppb)        | NO2_1                | slope       | 6                    | 1.09       | 1.14          | 1.20       |
| NO <sub>2</sub> (ppb)        | NO2_1                | intercept   | 6                    | -29.02     | -3.15         | -0.55      |
| NO <sub>2</sub> (ppb)        | NO2_2                | slope       | 18                   | 0.55       | 1.05          | 1.23       |
| NO <sub>2</sub> (ppb)        | NO2_2 <sup>c</sup>   | intercept   | 18                   | 0          | 0             | 0          |
| CO (ppm)                     | CO_1                 | slope       | 16                   | 1.05       | 1.10          | 1.16       |
| CO (ppm)                     | CO_1                 | intercept   | 16                   | 1.60       | 2.25          | 2.77       |
| CO (ppm)                     | CO_190134            | slope       | 5                    | 0.74       | 0.84          | 0.94       |
| CO (ppm)                     | CO_190134            | intercept   | 5                    | 1.46       | 2.19          | 2.27       |
| CO (ppm)                     | CO_3                 | slope       | 13                   | 0.20       | 0.41          | 0.82       |
| CO (ppm)                     | CO_3                 | intercept   | 13                   | 0.81       | 1.33          | 2.29       |

<sup>a</sup> CO<sub>2</sub> was automatically reset after each calibration, and no additional adjustments were necessary.

<sup>b</sup> N = number of calibration days.

<sup>c</sup> A no intercept model was fit to instrument NO<sub>2</sub>\_2, which reset after each baseline zero reading.



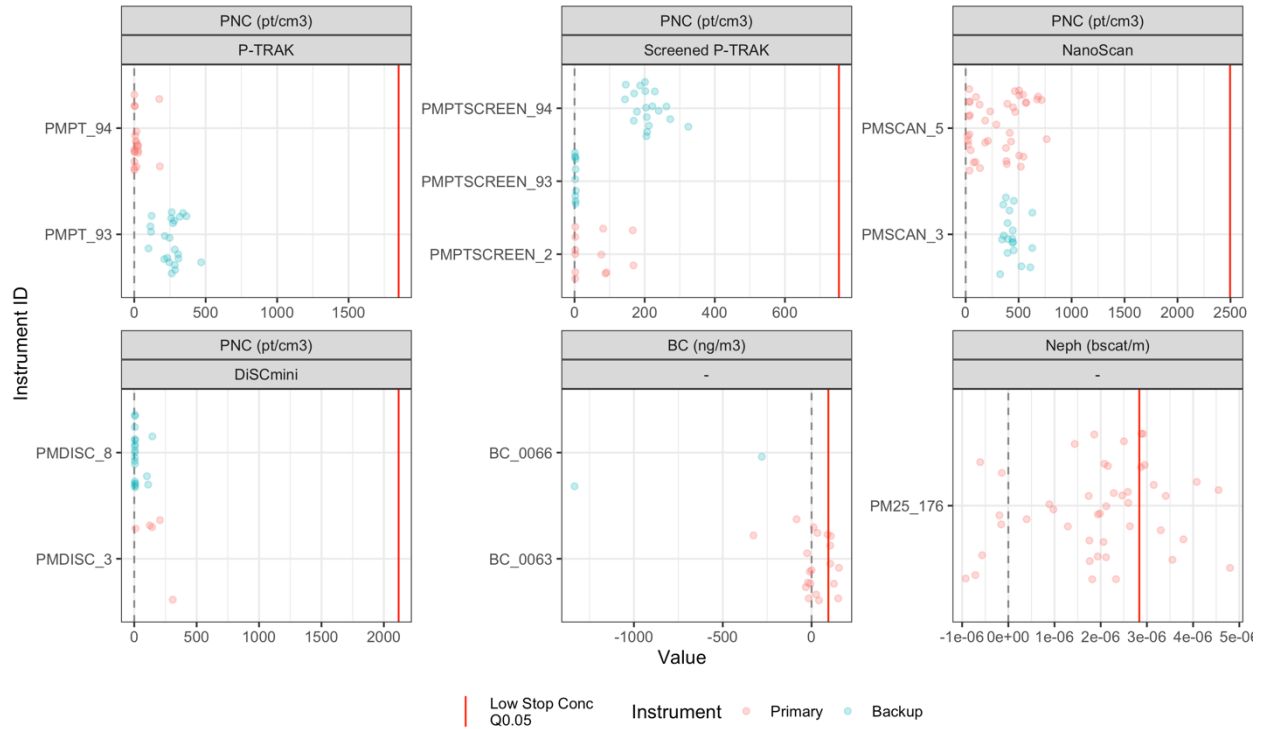

Figure S5. Particle instrument (y-axis) responses to filtered air concentrations (x-axis; near 0 pt/cm<sup>3</sup>). Dots show median, two-minute instrument readings. Red lines are “low” ambient concentration references, based on the 5<sup>th</sup> quantile of stop concentrations for each pollutant.

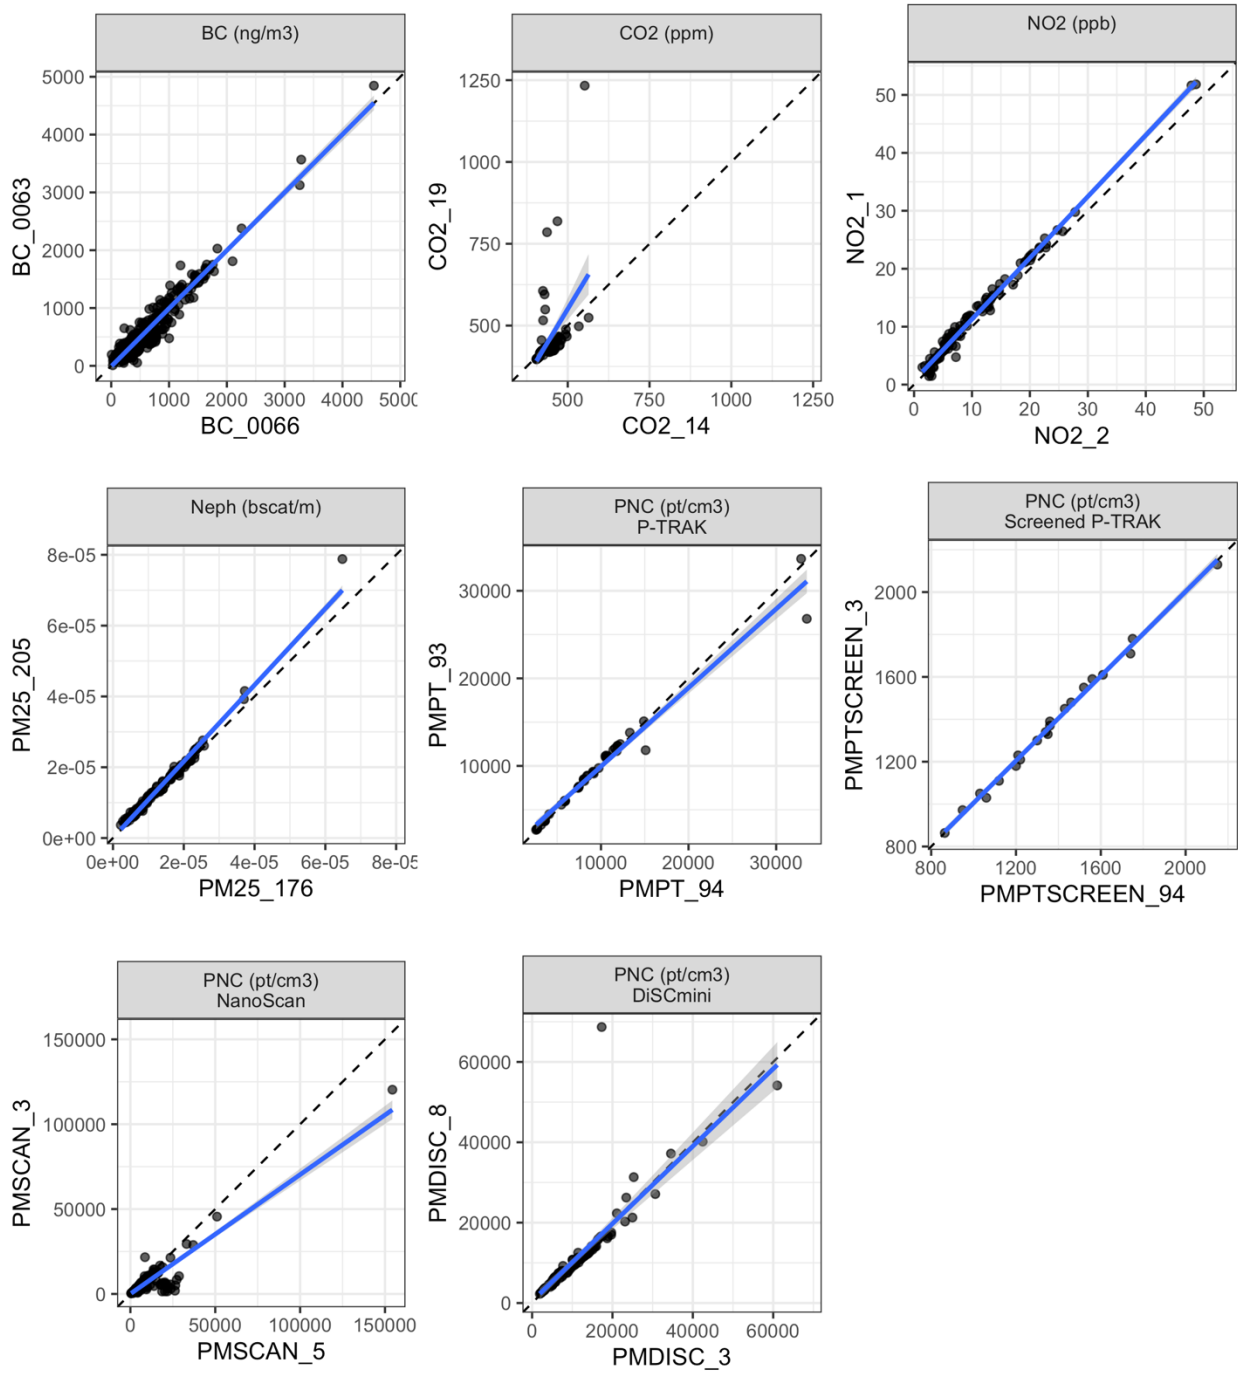

Figure S6. Comparison of two-minute median stop concentrations from instrument collocations. Gas values are post calibration.

Table S4. Distribution of temperature and relative humidity conditions inside the manifold during site visits (N=9,047 total). a

| Variable              | Min | Q05 | Q25 | Median | Q75 | Q95 | Max |
|-----------------------|-----|-----|-----|--------|-----|-----|-----|
| Relative Humidity (%) | 12  | 26  | 37  | 44     | 51  | 61  | 78  |
| Temperature (F)       | 50  | 60  | 64  | 67     | 72  | 80  | 96  |

<sup>a</sup> Measurements are for 2-min medians from within the vehicle (manifold) for 9,047 site visits

Table S5. Collocation regulatory sites and similar parameters measured.a

| Station (ID)                               | Location                             | PM <sub>2.5</sub><br>FRM | PM <sub>2.5</sub><br>FEM | bscat<br>& PM <sub>2.5</sub><br>bscat | BC  | NO <sub>2</sub> <sup>b</sup> |
|--------------------------------------------|--------------------------------------|--------------------------|--------------------------|---------------------------------------|-----|------------------------------|
| 10 <sup>th</sup> & Weller,<br>Seattle (BK) | Urban Center; near-road              | No                       | Yes                      | No                                    | Yes | Yes                          |
| Tukwila Allentown<br>(BL)                  | Suburban, industrial,<br>residential | No                       | Yes                      | Yes                                   | Yes | No                           |
| Beacon Hill (BW)                           | Suburban, commercial,<br>residential | Yes                      | Yes                      | No                                    | No  | Yes                          |
| Duwamish (CE)                              | Urban center, industrial             | No                       | Yes                      | Yes                                   | Yes | No                           |
| James St & Central<br>Ave, Kent (CW)       | Suburban, commercial                 | No                       | Yes                      | Yes                                   | Yes | No                           |

<sup>a</sup> FRM: federal reference method; FEM: federal equivalent method; bscat: beta light scattering; Temp: temperature (°F); RH: relative humidity

<sup>b</sup> or NO<sub>x</sub>-NO

## S1.4 Prediction Models

### *Note S5. Geographic covariates*

There were 350 initial geographic covariates (geocovariates) that were reduced to 191 taking a similar approach as past work (SI Table S6).<sup>19,20,45</sup> Using the training-validation data set (90%, n=278 sites), first, we excluded variables if they lacked variability (less than 40% of the data were different from the most common value) since these were not likely to improve, and could even worsen, the model fit. Next, we excluded all land use proportion variables where the maximum proportion observed in the data was less than 20%. Low values for these variables indicated that these land use types made up a small fraction of the land relative to other land use variables and would not likely have a meaningful impact on observed pollutant concentrations. We dropped variables if too many outliers were observed in the data (>2% of the total data). Finally, we log-transformed proximity variables to better model pollutant exponential decay with increasing source distance.

Table S6. Available geographic covariates (geocovariates) used in UK-PLS models.

| <b>Kind</b>             | <b>Covariate</b> | <b>Buffers</b>                                       | <b>Description</b>                                                                                                        |
|-------------------------|------------------|------------------------------------------------------|---------------------------------------------------------------------------------------------------------------------------|
| airports                | log_m_to_airp    | 0                                                    | log meters to closest airport                                                                                             |
| airports                | log_m_to_l_airp  | 0                                                    | log meters to closest large airport                                                                                       |
| bus                     | bus_s            | 100, 150, 300, 400, 500, 750, 1000, 1500, 3000, 5000 | sum of bus routes                                                                                                         |
| bus                     | log_m_to_bus     | 0                                                    | log meters to bus route                                                                                                   |
| coast                   | log_m_to_coast   | 0                                                    | log meters to closest coastline                                                                                           |
| columnar NO2            | no2_behr         | 0                                                    | columnar NO2, mean from 2005-2007                                                                                         |
| commercial and services | log_m_to_comm    | 0                                                    | log meters to closest commercial and services area                                                                        |
| elevation               | elev_above       | 1000, 5000                                           | number of points (out of 24) more than 20 m and 50 m uphill of a location for a 1000 m and 5000 m buffer, respectively    |
| elevation               | elev_at_elev     | 1000, 5000                                           | number of points (out of 24) within 20 m and 50 m of the location' elevation for a 1000 m and 5000 m buffer, respectively |
| elevation               | elev_below       | 1000, 5000                                           | number of points (out of 24) more than 20 m and 50 m downhill of a location for a 1000 m and 5000 m buffer, respectively  |
| elevation               | elev_elevation   | 0                                                    | elevation above sea level in meters                                                                                       |

|                |                    |                                                    |                                                                                                                              |
|----------------|--------------------|----------------------------------------------------|------------------------------------------------------------------------------------------------------------------------------|
| elevation      | elev_stddev        | 1000, 5000                                         | standard deviation of elevation of 20 points surrounding the location                                                        |
| imperviousness | imp_a              | 50, 100, 150, 300, 400, 500, 750, 1000, 3000, 5000 | average imperviousness                                                                                                       |
| land use       | rlu_decid_forest_p | 500, 750, 1000                                     | proportion of deciduous forest                                                                                               |
| land use       | rlu_dev_hi_p       | 300, 400, 500, 750, 1000, 3000, 5000               | proportion of highly developed land (e.g., commercial and services; industrial; transportation, communication and utilities) |
| land use       | rlu_dev_lo_p       | 50, 100, 150, 300, 400, 500, 750, 1000, 3000, 5000 | proportion of low developed land (e.g., residential)                                                                         |
| land use       | rlu_dev_med_p      | 50, 100, 150, 300, 400, 500, 750, 1000, 3000, 5000 | proportion of medium developed land (e.g., residential)                                                                      |
| land use       | rlu_dev_open_p     | 150, 300, 400, 500, 750, 1000, 3000, 5000          | proportion of developed open land                                                                                            |
| land use       | rlu_evergreen_p    | 400, 500, 750, 1000                                | proportion of evergreen forest                                                                                               |
| land use       | rlu_mix_forest_p   | 500, 750, 1000, 5000                               | proportion of mixed forest                                                                                                   |
| NDVI           | ndvi_q25_a         | 250, 500, 1000, 2500, 5000, 7500, 10000            | NDVI (25th quantile)                                                                                                         |
| NDVI           | ndvi_q50_a         | 250, 500, 1000, 2500, 5000, 7500, 10000            | NDVI (50th quantile)                                                                                                         |
| NDVI           | ndvi_q75_a         | 250, 500, 1000, 2500, 5000, 7500, 10000            | NDVI (75th quantile)                                                                                                         |

|                       |                          |                                                                |                                               |
|-----------------------|--------------------------|----------------------------------------------------------------|-----------------------------------------------|
| NDVI                  | ndvi_summer_a            | 250, 500, 1000,<br>2500, 5000, 7500,<br>10000                  | average summer time NDVI                      |
| NDVI                  | ndvi_winter_a            | 250, 500, 1000,<br>2500, 5000, 7500,<br>10000                  | average winter time NDVI                      |
| population            | pop10_s                  | 500, 1000, 1500,<br>2000, 2500, 3000,<br>5000, 10000,<br>15000 | 2010 population density                       |
| port                  | log_m_to_l_port          | 0                                                              | log meters to closest large port              |
| railroads, rail yards | log_m_to_rr              | 0                                                              | log meters to closest railroad                |
| railroads, rail yards | log_m_to_ry              | 0                                                              | log meters to closest rail yard               |
| roads                 | intersect_a1_a3_s        | 3000                                                           | number of A1-A3 road intersections            |
| roads                 | intersect_a3_a3_s        | 500, 1000, 3000                                                | number of A3-A3 road intersections            |
| roads                 | ll_a1_s                  | 1500, 3000, 5000                                               | length of A1 roads                            |
| roads                 | ll_a2_s                  | 5000                                                           | length of A2 roads                            |
| roads                 | ll_a23_s                 | 100, 150, 300,<br>400, 500, 750,<br>1000, 1500, 3000,<br>5000  | length of A2 and A3 roads                     |
| roads                 | ll_a3_s                  | 100, 150, 300,<br>400, 500, 750,<br>1000, 1500, 3000,<br>5000  | length of A3 roads                            |
| roads                 | log_m_to_a1              | 0                                                              | log meters to closest A1 road                 |
| roads                 | log_m_to_a1_a1_intersect | 0                                                              | log meters to closest A1-A1 road intersection |

|                 |                          |                                           |                                               |
|-----------------|--------------------------|-------------------------------------------|-----------------------------------------------|
| roads           | log_m_to_a1_a2_intersect | 0                                         | log meters to closest A1-A2 road intersection |
| roads           | log_m_to_a1_a3_intersect | 0                                         | log meters to closest A1-A3 road intersection |
| roads           | log_m_to_a123            | 0                                         | log meters to closest A1, A2 or A3 road       |
| roads           | log_m_to_a2              | 0                                         | log meters to closest A2 road                 |
| roads           | log_m_to_a2_a2_intersect | 0                                         | log meters to closest A2-A2 road intersection |
| roads           | log_m_to_a2_a3_intersect | 0                                         | log meters to closest A2-A3 road intersection |
| roads           | log_m_to_a23             | 0                                         | log meters to closest A2 or A3 road           |
| roads           | log_m_to_a3              | 0                                         | log meters to closest A3 road                 |
| roads           | log_m_to_a3_a3_intersect | 0                                         | log meters to closest A3-A3 road intersection |
| stack emissions | em_CO_s                  | 3000, 15000, 30000                        | sum of CO stack emissions                     |
| stack emissions | em_NOx_s                 | 15000, 30000                              | sum of NOx stack emissions                    |
| stack emissions | em_PM10_s                | 15000, 30000                              | sum of PM10 stack emissions                   |
| stack emissions | em_PM25_s                | 15000, 30000                              | sum of PM2.5 stack emissions                  |
| stack emissions | em_SO2_s                 | 15000                                     | sum of SO2 stack emissions                    |
| truck routes    | log_m_to_truck           | 0                                         | log meters to closest truck route             |
| truck routes    | tl_s                     | 750, 1000, 1500, 3000, 5000, 10000, 15000 | length of truck routes                        |



|       |                   |                  |                                |
|-------|-------------------|------------------|--------------------------------|
| water | log_m_to_waterway | 0                | log meters to closest waterway |
| water | rlu_water_p       | 1000, 3000, 5000 | proportion of water            |

---

## S2 Results

### S2.1 Site Visits

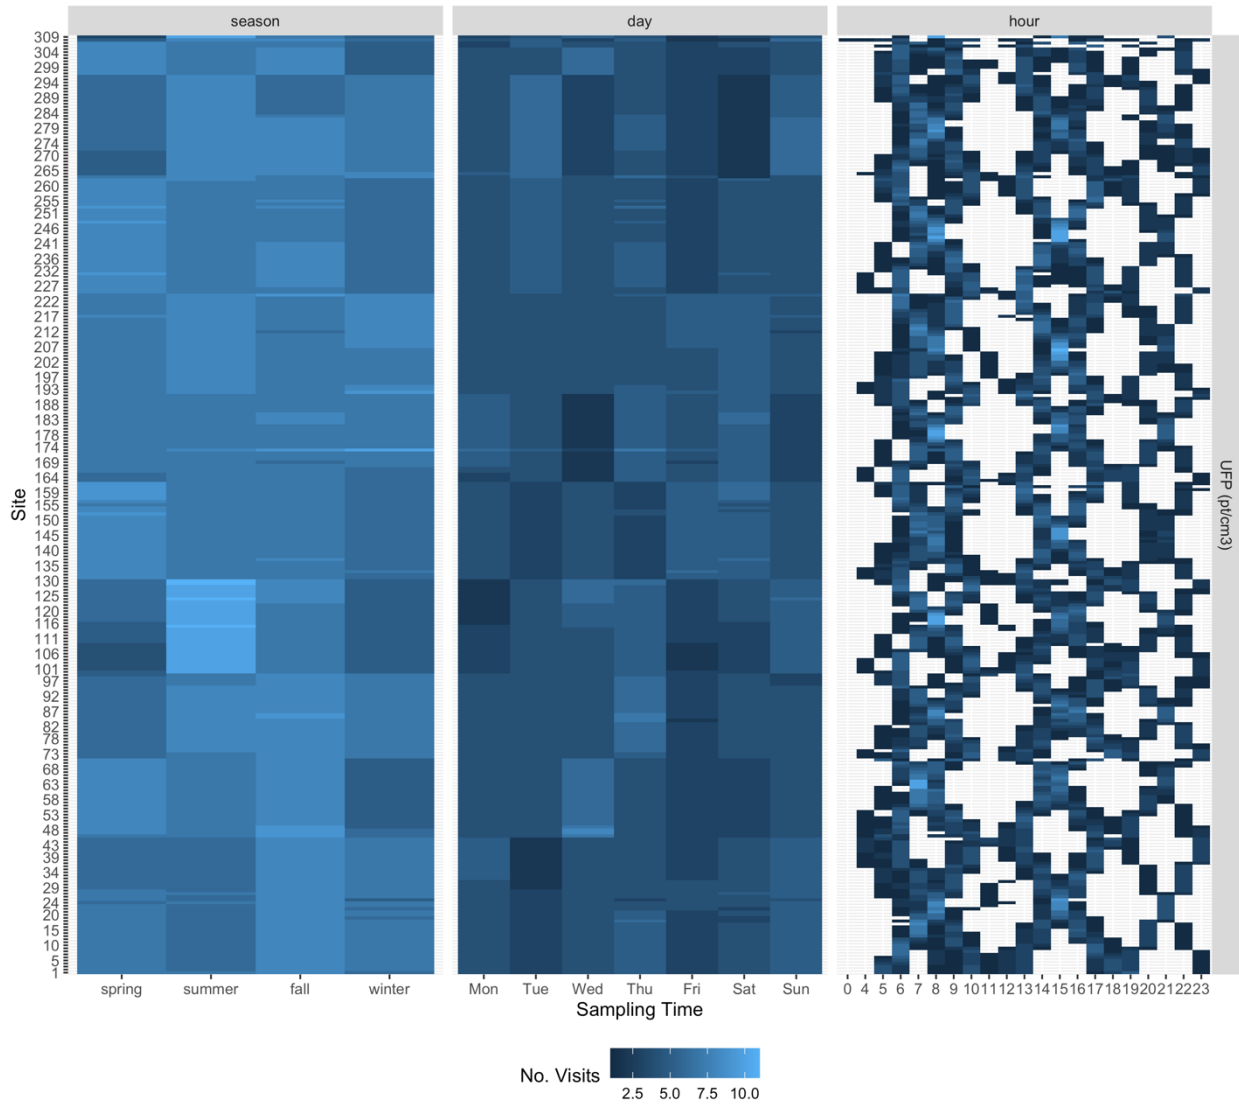

Figure S7. Number of site visits per time period. Showing PNC data, though all instruments were similar.

Table S7. Original and final mobile monitoring stop measurements (~2 min each).

| Pollutant <sup>a</sup>                     | Original Stop Measurements <sup>b</sup> |        | Dropped Stop Measurements <sup>c</sup> |       | Final Stop Measurements <sup>b</sup> |        |
|--------------------------------------------|-----------------------------------------|--------|----------------------------------------|-------|--------------------------------------|--------|
|                                            | N                                       | %      | N                                      | %     | N                                    | %      |
| CO <sub>2</sub> (ppm)                      | 8,982                                   | 99.28% | 32                                     | 0.36% | 8,950                                | 98.93% |
| BC (ng/m <sup>3</sup> )                    | 9,005                                   | 99.54% | 144                                    | 1.6%  | 8,861                                | 97.94% |
| Neph (bscat/m)                             | 8,802                                   | 97.29% | 16                                     | 0.18% | 8,786                                | 97.12% |
| NO <sub>2</sub> (ppb)                      | 8,913                                   | 98.52% | 147                                    | 1.65% | 8,766                                | 96.89% |
| PNC (pt/cm <sup>3</sup> ), P-TRAK          | 8,731                                   | 96.51% | 2                                      | 0.02% | 8,729                                | 96.49% |
| PNC (pt/cm <sup>3</sup> ), screened P-TRAK | 8,908                                   | 98.46% | 0                                      | 0%    | 8,908                                | 98.46% |
| PNC (pt/cm <sup>3</sup> ), NanoScan        | 9,000                                   | 99.48% | 1                                      | 0.01% | 8,999                                | 99.47% |
| PNC (pt/cm <sup>3</sup> ), DiSCmini        | 8,790                                   | 97.16% | 93                                     | 1.06% | 8,697                                | 96.13% |
| TOTAL                                      | 71,131                                  | 98.28% | 435                                    | 0.61% | 70,696                               | 97.68% |

<sup>a</sup> PNC units are particles (pt) per cm<sup>3</sup>.

<sup>b</sup> Original and final stop measurement percents are based on the total number of stops that collected at least one 2-minute measurement in the campaign (9,047; Total = 72,376 = 9,047 stops x 8 instruments).

<sup>c</sup> Measurements were dropped for various reasons: readings outside of each instrument's reporting range; NanoScan and non-screened P-TRAK readings < 300 pt/cm<sup>3</sup>; backup CO<sub>2</sub>

instrument (CO2\_19) and all CO (both instruments) readings because these did not meet QC protocols (see Note S4). Dropped stops percents are based on the original stop measurements (the measurements actually collected).

Table S8. Distribution of winsorized median site visit concentrations ( $N = 309$  sites  $\times$   $\sim 29$  visits/site).

| Pollutant                              |                 | N     | Q05   | Q25   | Median | Mean   | Q75    | Q95    |
|----------------------------------------|-----------------|-------|-------|-------|--------|--------|--------|--------|
| PNC (pt/cm <sup>3</sup> )              | P-TRAK          | 8,728 | 1,850 | 3,640 | 5,850  | 7,454  | 9,131  | 18,032 |
| PNC (pt/cm <sup>3</sup> )              | Screened P-TRAK | 8,908 | 754   | 1,580 | 2,520  | 3,285  | 4,050  | 8,136  |
| PNC (pt/cm <sup>3</sup> )              | NanoScan        | 8,999 | 2,496 | 5,060 | 8,150  | 10,762 | 13,165 | 27,235 |
| PNC (pt/cm <sup>3</sup> )              | DiSCmini        | 8,697 | 2,118 | 4,336 | 7,028  | 9,889  | 11,413 | 24,575 |
| BC (ng/m <sup>3</sup> )                |                 | 8,860 | 94    | 242   | 402    | 584    | 694    | 1,736  |
| NO <sub>2</sub> (ppb)                  |                 | 8,747 | 1.7   | 4.1   | 7.4    | 9.4    | 13     | 24     |
| PM <sub>2.5</sub> (µg/m <sup>3</sup> ) |                 | 8,786 | 1.8   | 2.7   | 3.9    | 4.8    | 5.8    | 11     |
| CO <sub>2</sub> (ppm)                  |                 | 8,950 | 405   | 415   | 425    | 431    | 441    | 478    |

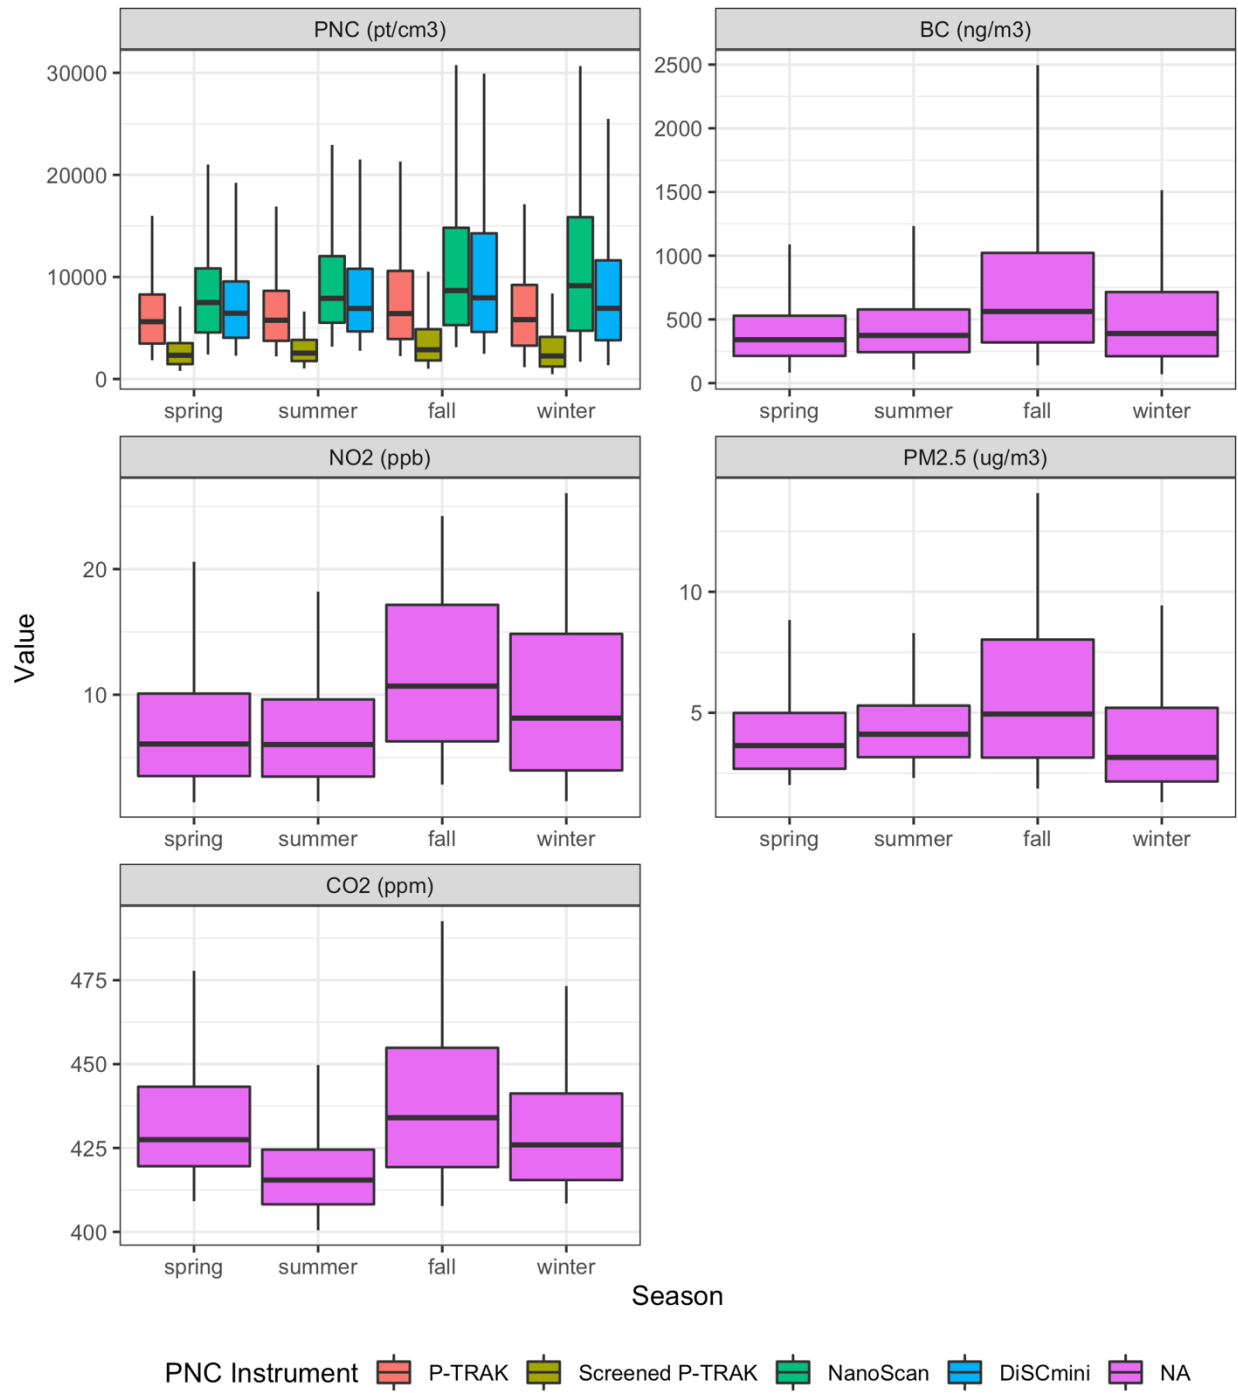

Figure S8. Distribution of winsorized median site visit concentrations by season. Boxes show the 25<sup>th</sup>, 50<sup>th</sup> and 75<sup>th</sup> quantiles; whiskers show the 5<sup>th</sup> and 95<sup>th</sup> quantiles. The "NA" PNC legend value refers to pollutants other than PNC.

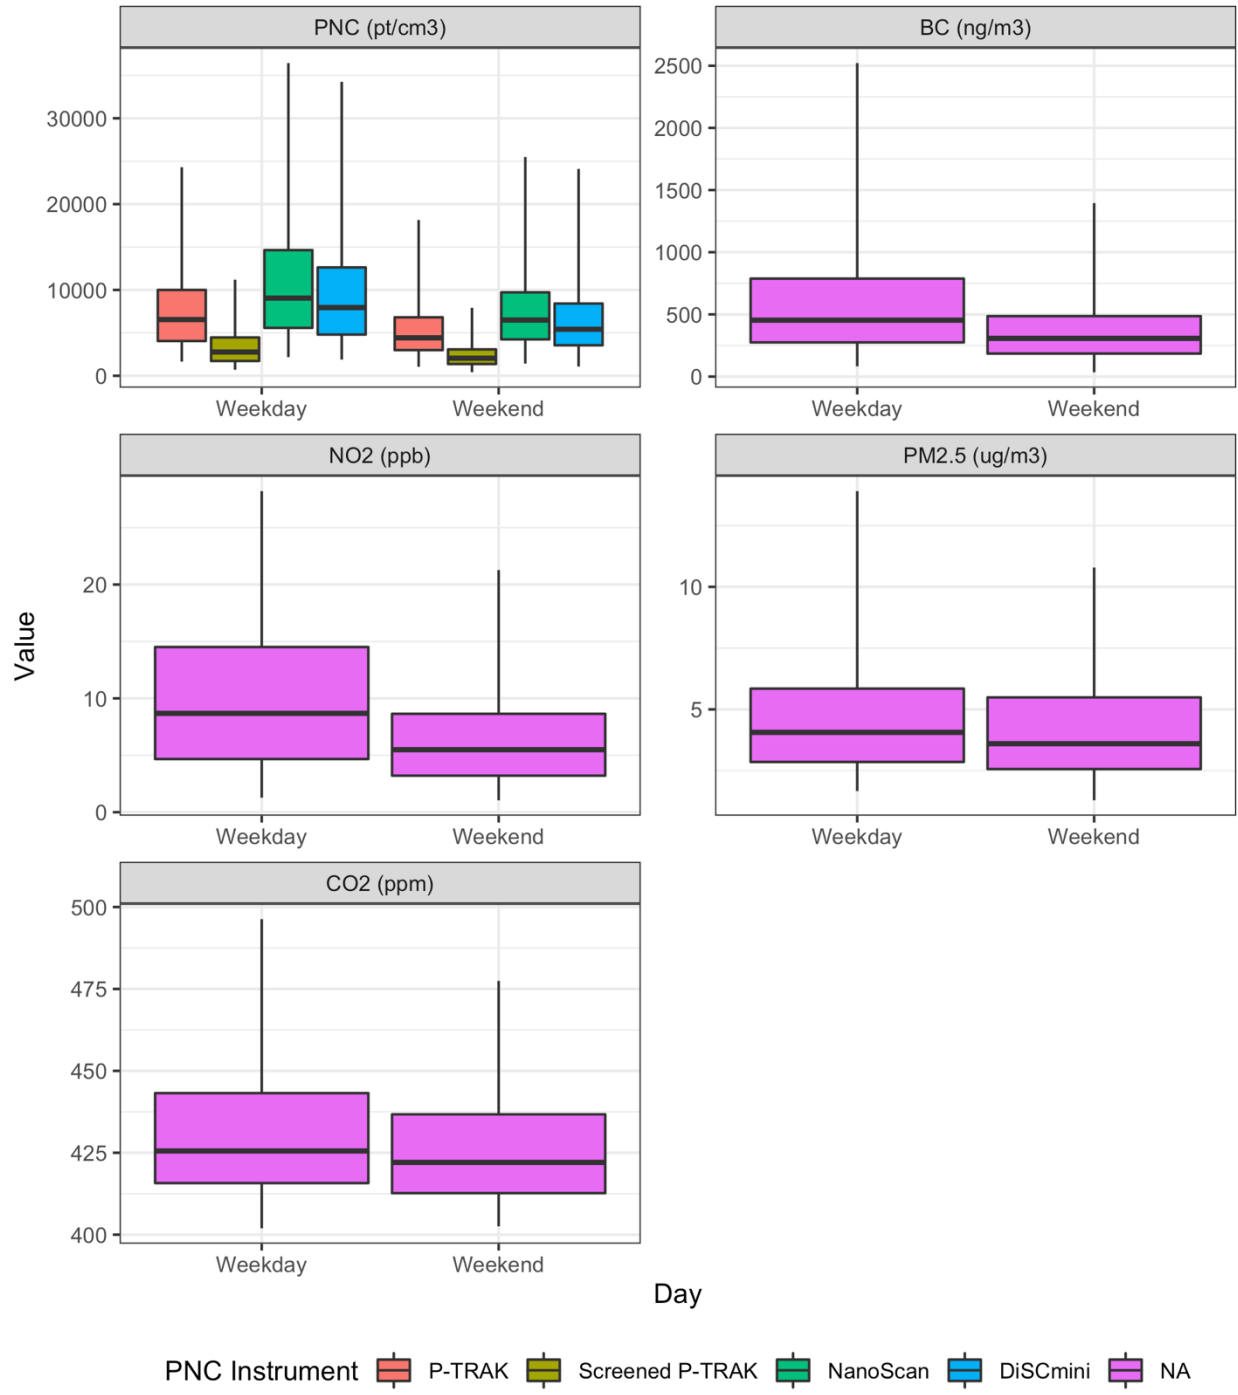

Figure S9. Distribution of winsorized median site visit concentrations by day of the week. Boxes show the 25<sup>th</sup>, 50<sup>th</sup> and 75<sup>th</sup> quantiles; whiskers show the 5<sup>th</sup> and 95<sup>th</sup> quantiles. The "NA" PNC legend value refers to pollutants other than PNC.

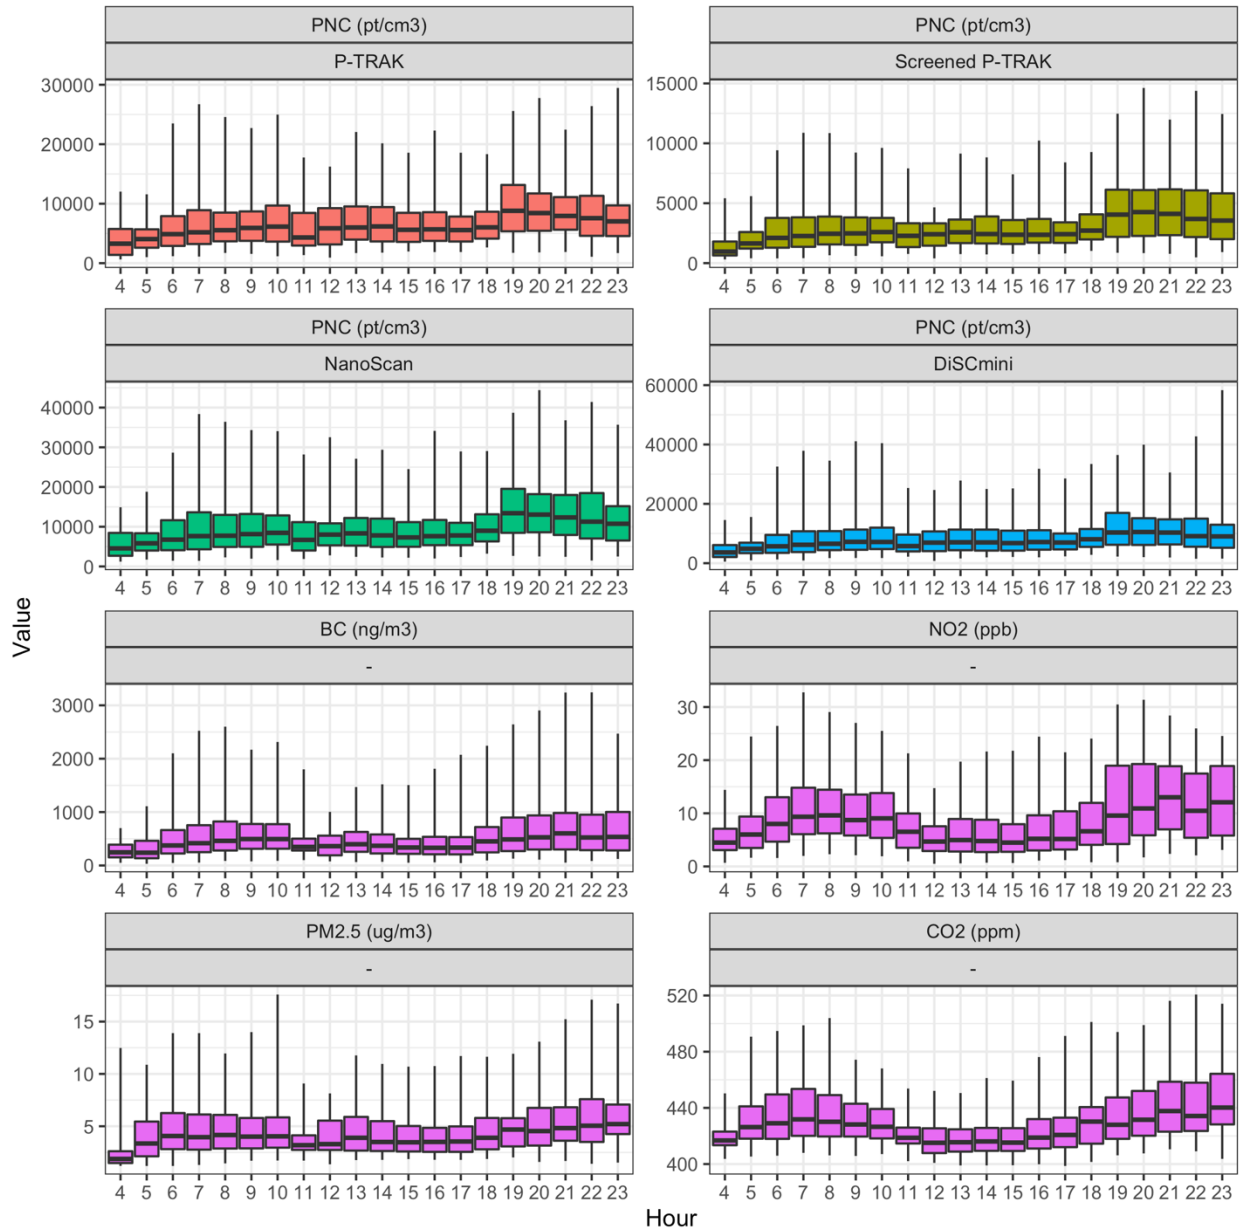

Figure S10. Distribution of winsorized median site visit concentrations by hour of the day. Boxes show the 25<sup>th</sup>, 50<sup>th</sup> and 75<sup>th</sup> quantiles; whiskers show the 5<sup>th</sup> and 95<sup>th</sup> quantiles.

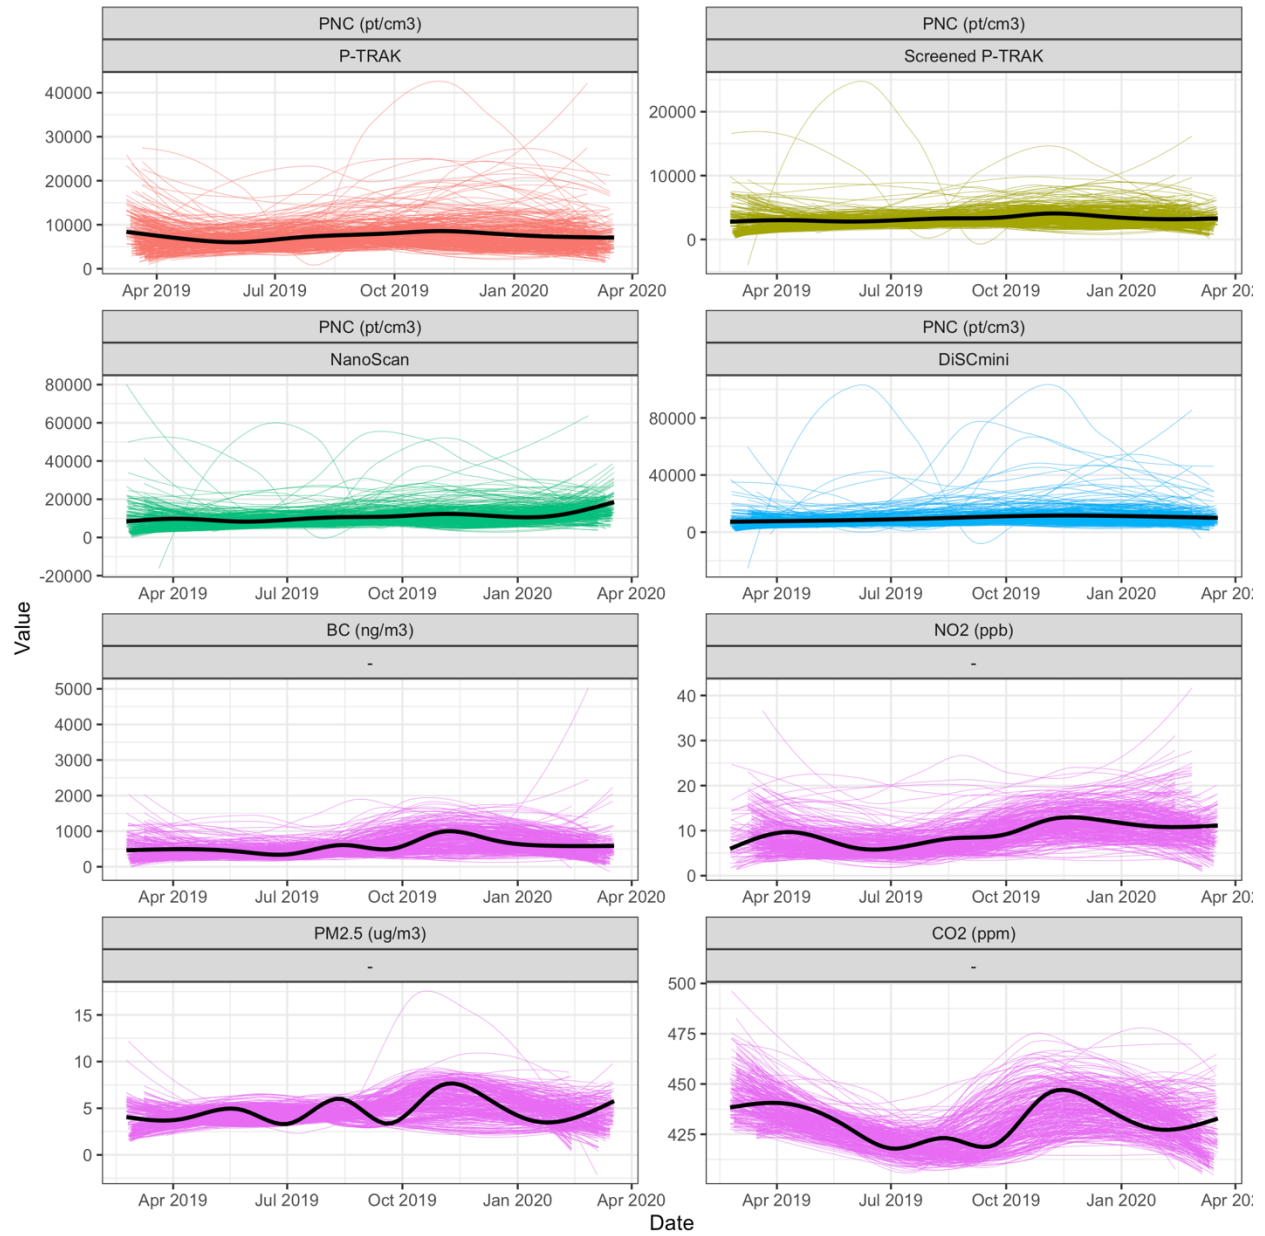

Figure S11. Site-specific concentrations over the course of the study. Thin lines show site-specific smooth (loess) fits for winsorized median visit concentrations ( $N \sim 29$  visits/site). Black lines show the overall smooth trends for all the sites.



## S2.2 Collocations at Regulatory Monitoring Sites

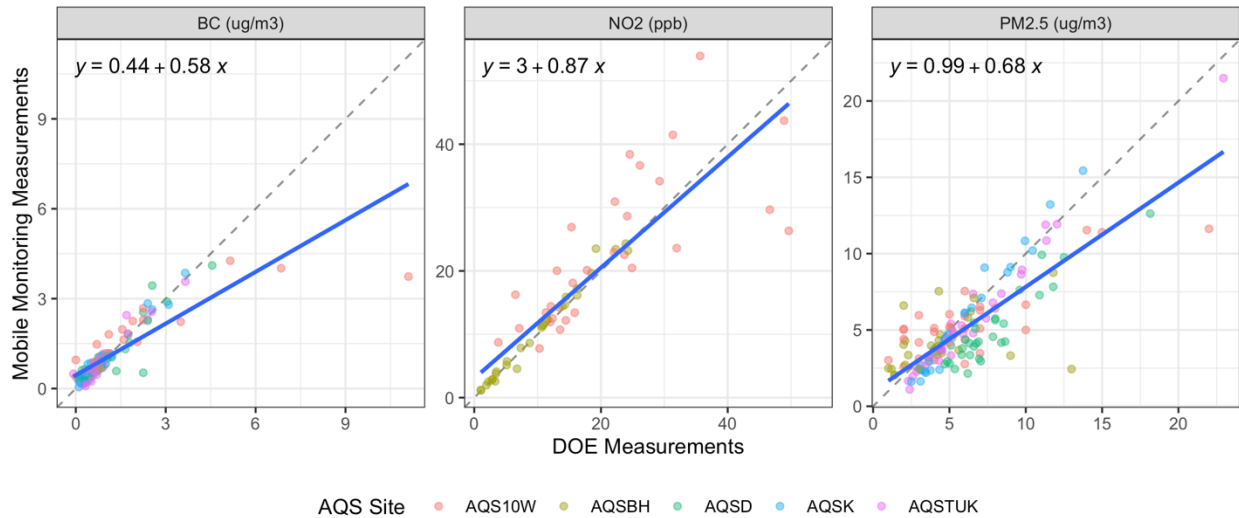

Figure S12. Comparison of two-minute median concentrations from mobile monitoring and the Department of Ecology (DOE) readings at air quality system (AQS) collocation sites. MSE-based  $R^2$ : BC = 0.69,  $NO_2$  = 0.71,  $PM_{2.5}$  = 0.61. The dashed line is the 1-1 line; the blue line is the least squares linear regression fit. Mobile monitoring  $PM_{2.5}$  concentrations are from calibrated nephelometer readings (see Methods). DOE  $PM_{2.5}$  concentrations are from nephelometers when available (AQSD, AQSK, AQSTUK – readings are updated every minute), otherwise they are from gravimetric and beta attenuation (BAM) methods, which are updated less frequently (AQS10W – readings are based on rolling 1-hour estimates updated every 6 minutes, AQS10W – readings are updated hourly).

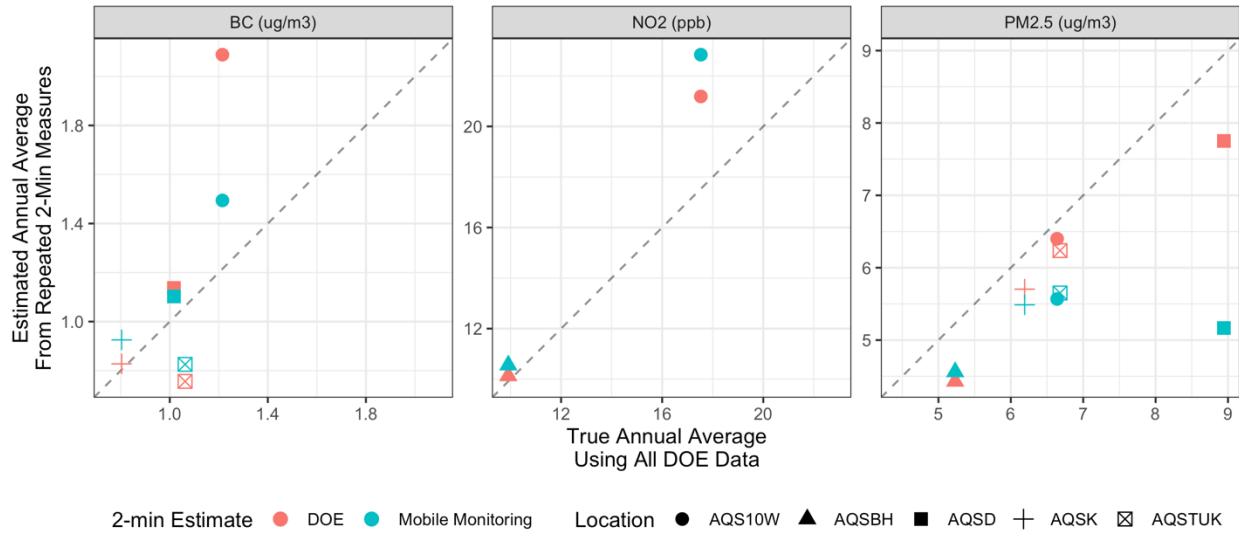

Figure S13. Comparison of true annual average pollutant estimates at air quality system (AQS) collocation sites to annual average estimates from repeated 2-min measures from mobile monitoring and the Department of Ecology (DOE). Plots compare estimates using mobile monitoring stop data, DOE data during the same two-minute time periods, to the true annual averages at those sites using all the available regulatory monitoring data for the study period.

### S2.3 Spatial and Temporal Variability

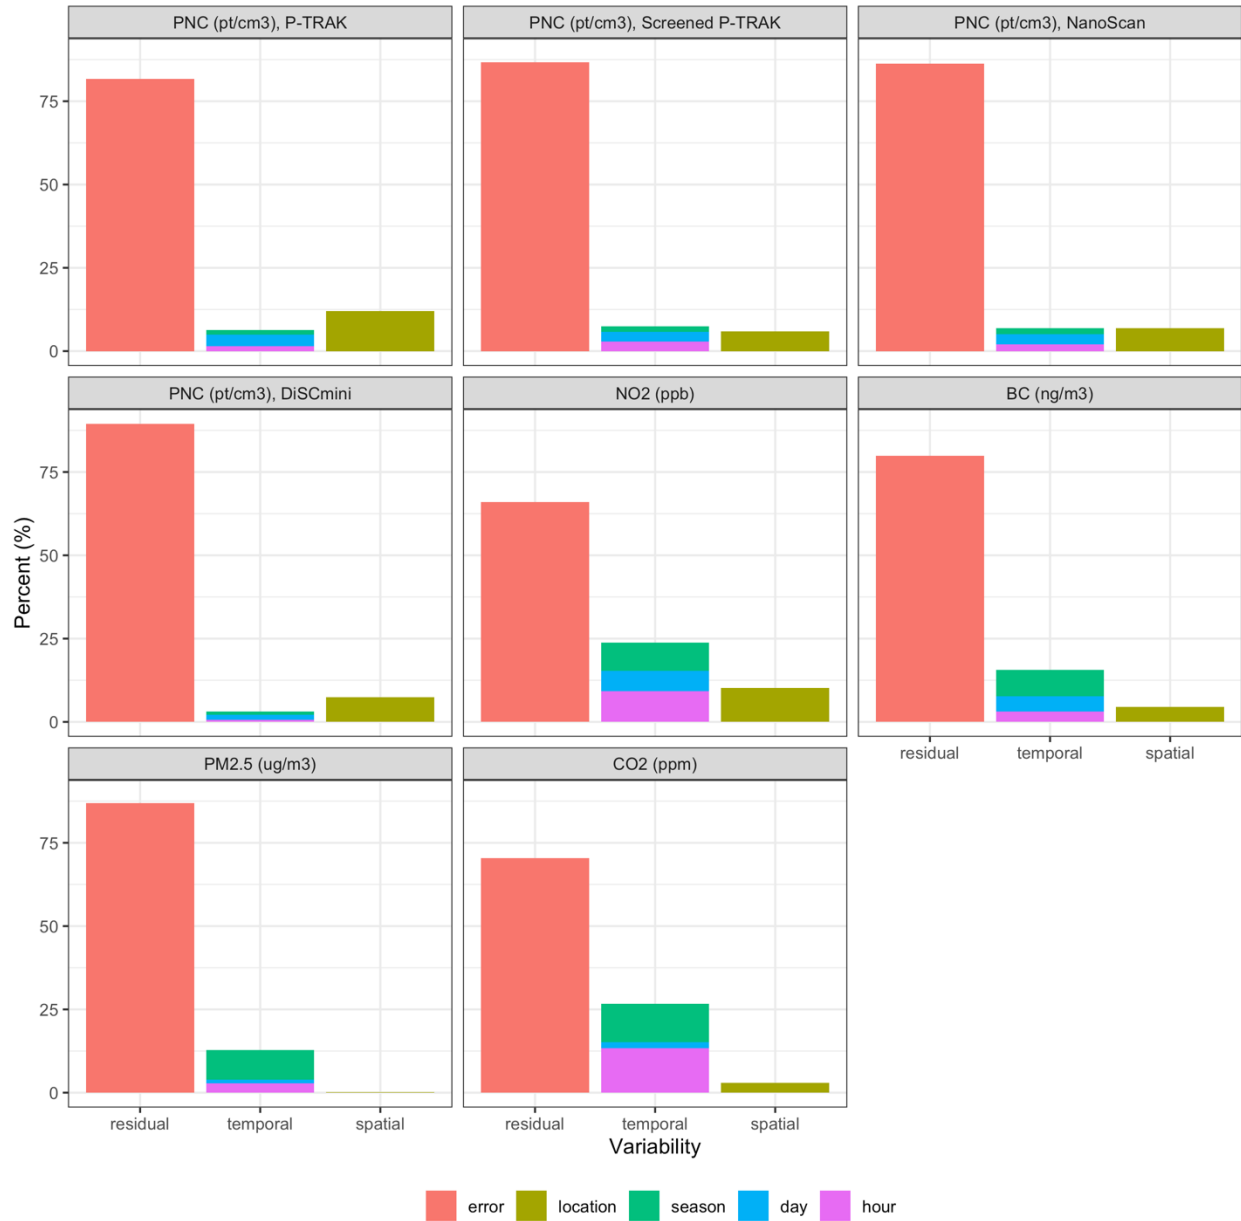

Figure S14. Percent of winsorized median visit concentration variability explained by spatial, temporal and within site factors for each pollutant (total = 100%). Pollutant values are based on separate Analysis of Variance (ANOVA) models. Spatial variability is the concentration variability across 309 sites. The residual error term represents within-site variability across approximately 29 visits per site.

## S2.4 Annual Averages

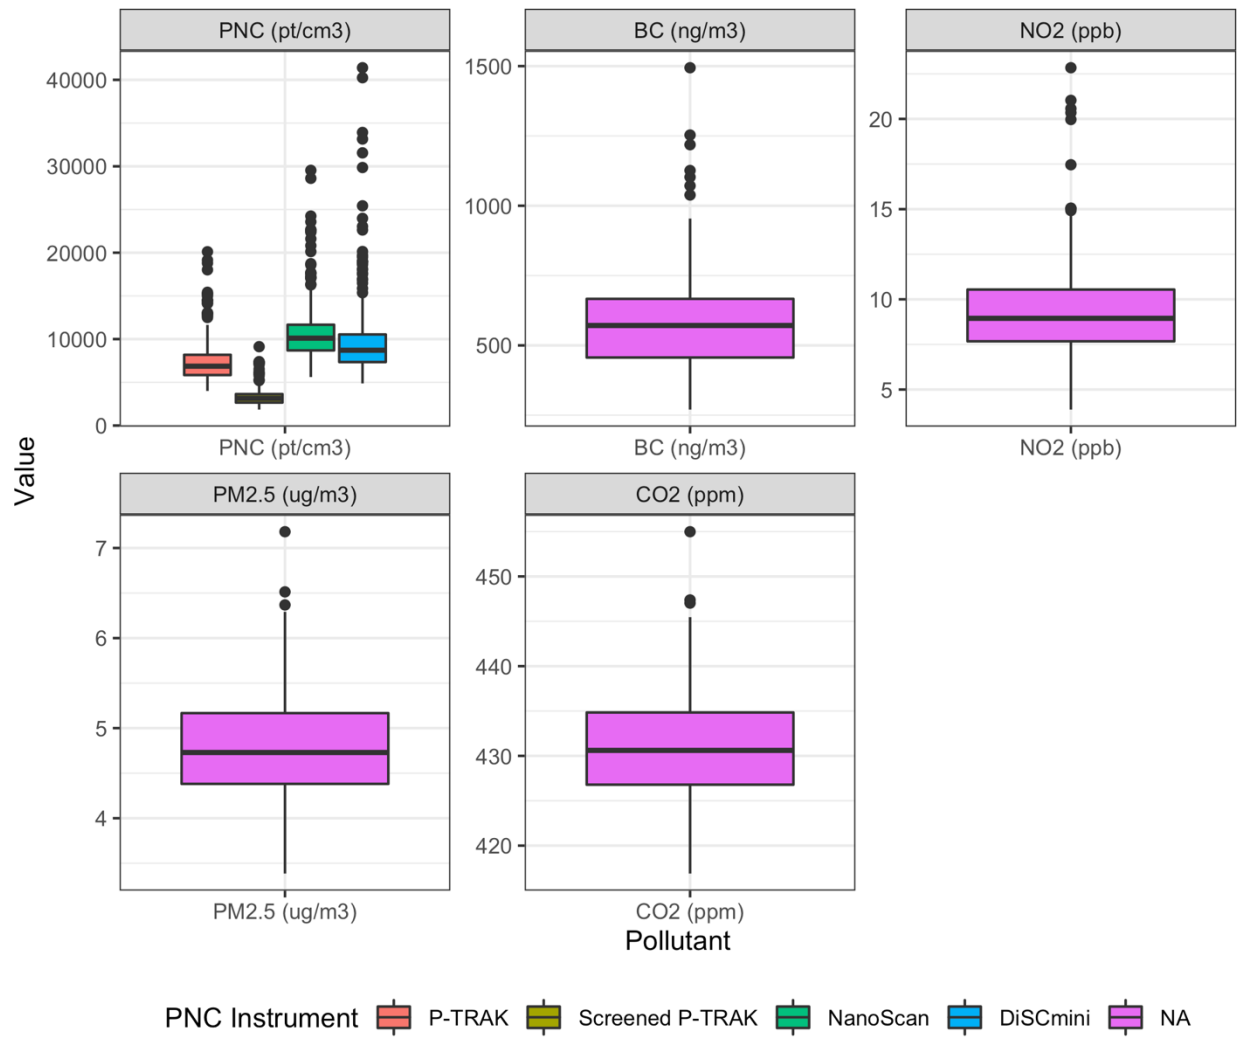

Figure S15. Annual average site concentrations from winsorized median visit concentration (N=309). The "NA" PNC legend value refers to pollutants other than PNC.

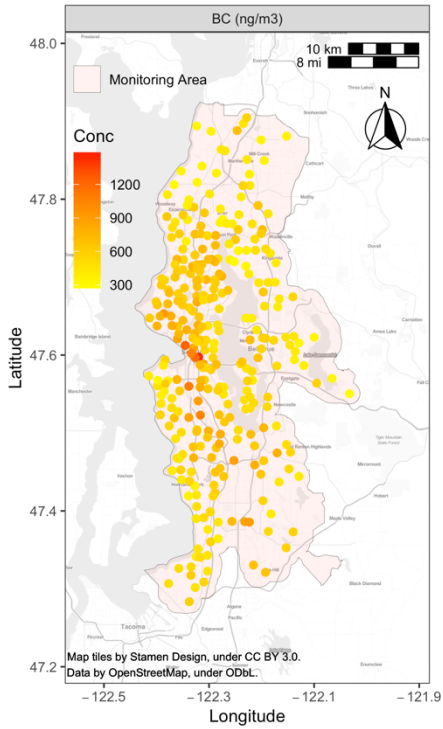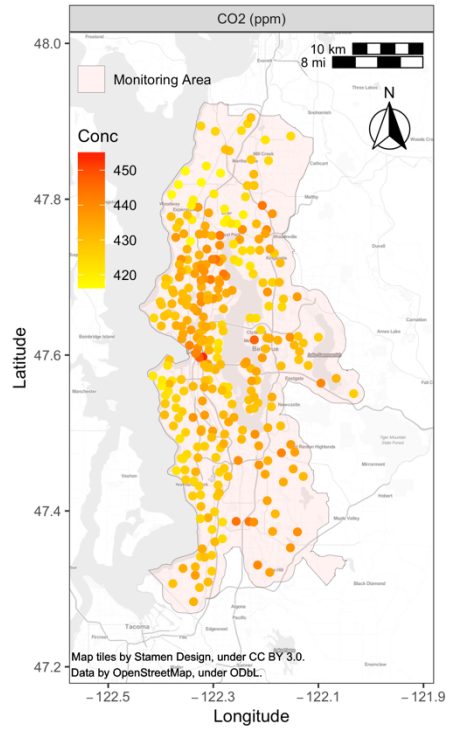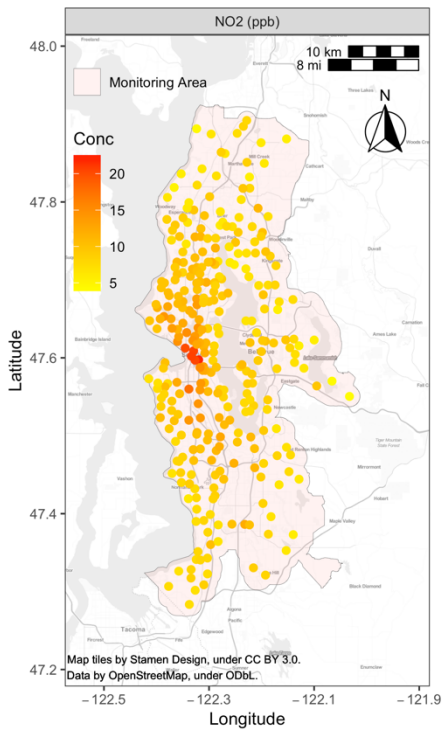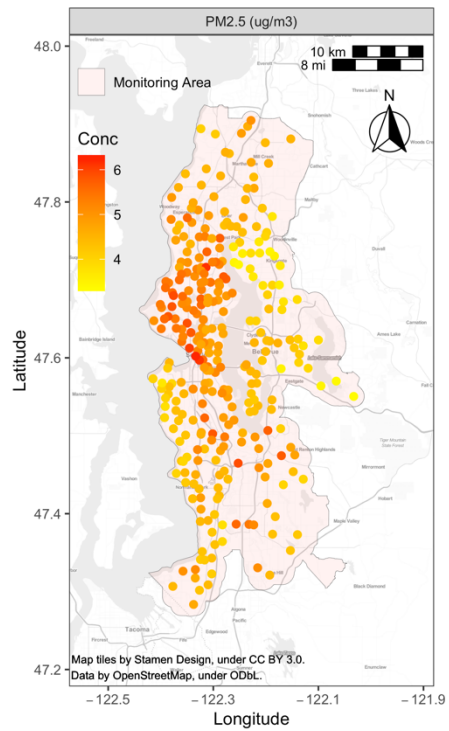

Figure S16. Annual average PM<sub>2.5</sub>, BC, NO<sub>2</sub> and CO<sub>2</sub> concentrations at monitoring sites (N=309).

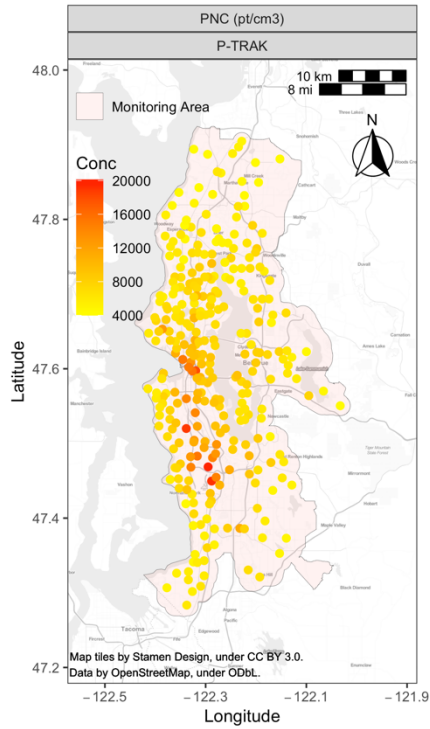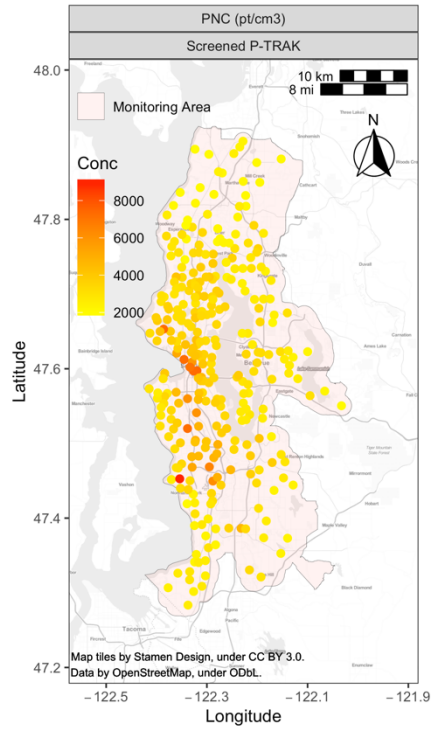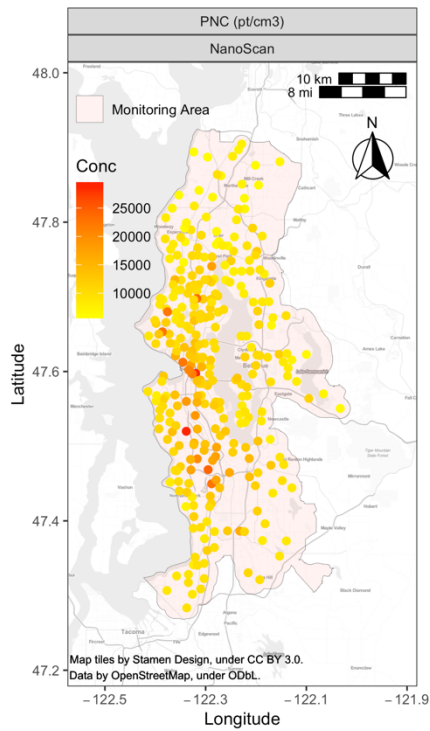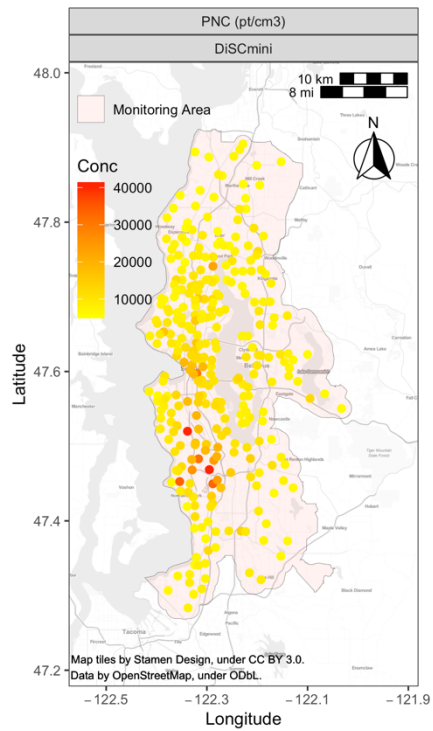

Figure S17. Annual average PNC concentrations at monitoring sites (N=309) from different PNC instruments.

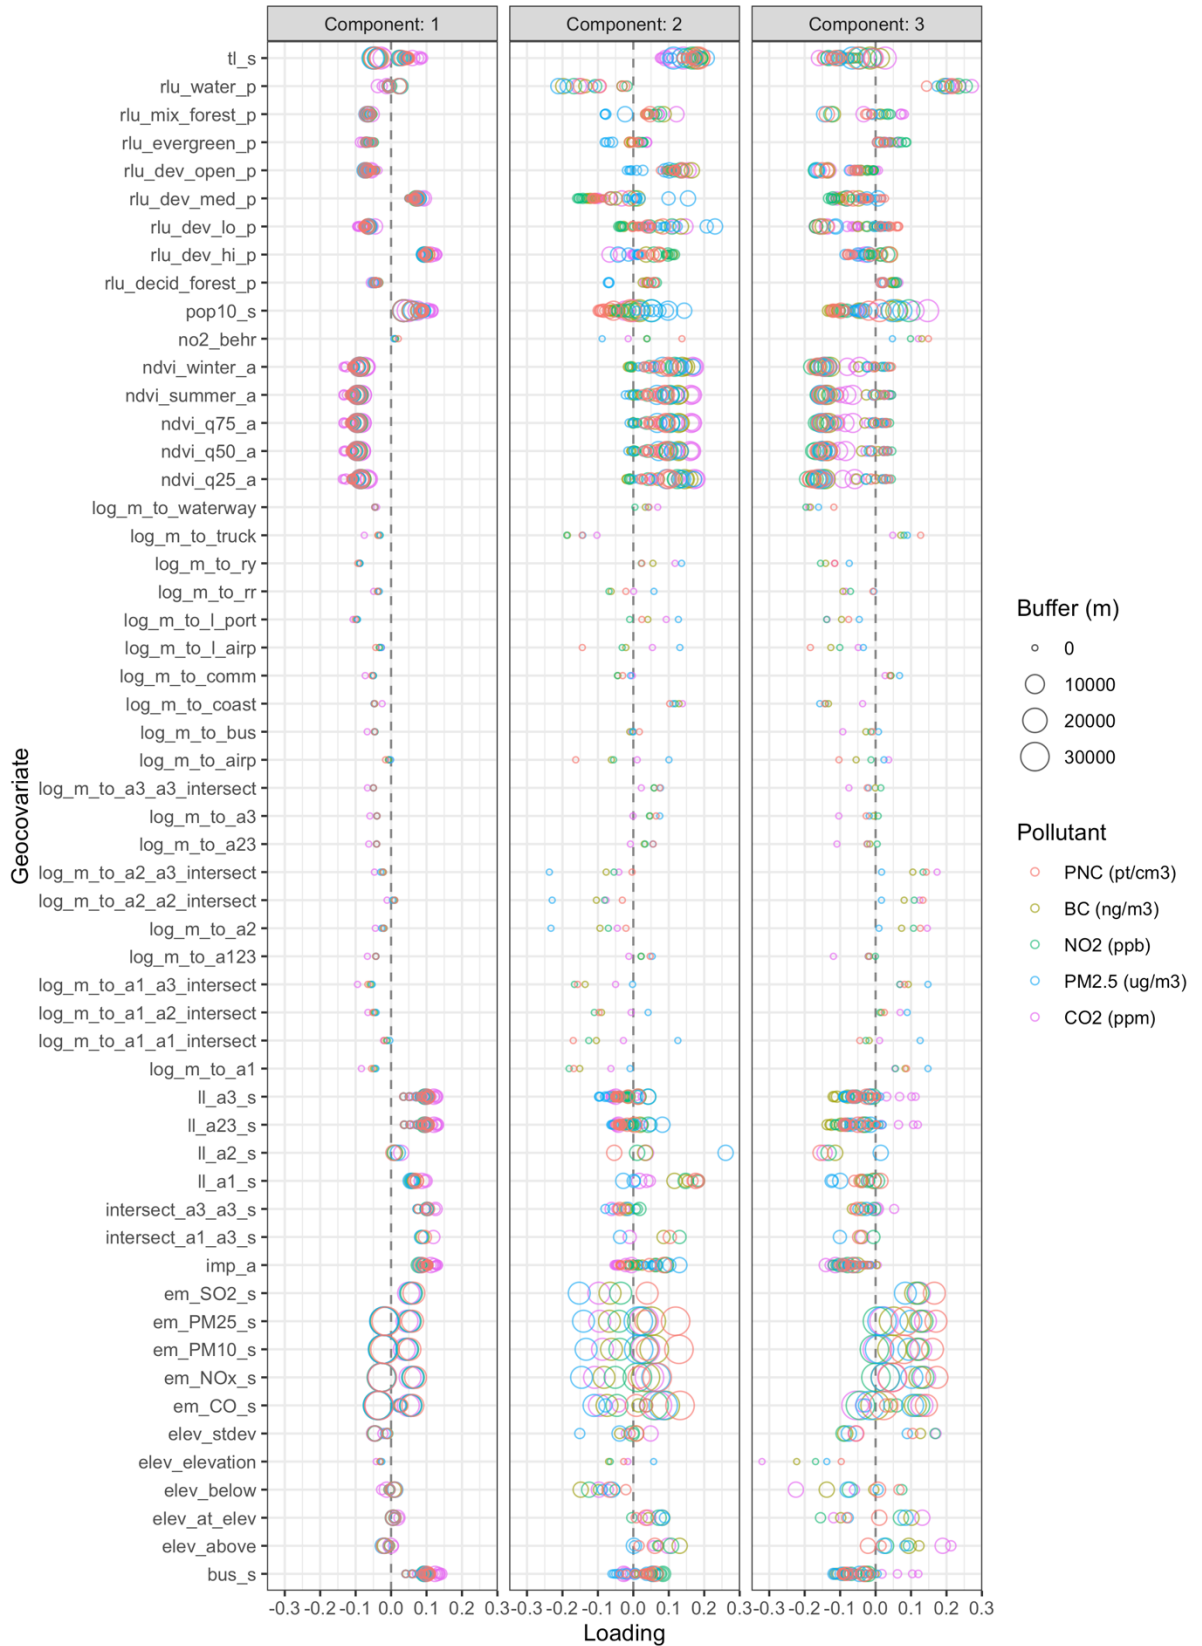

Figure S18. PLS loadings for pollutant models. PNC results are from the primary instrument, the P-TRAK.

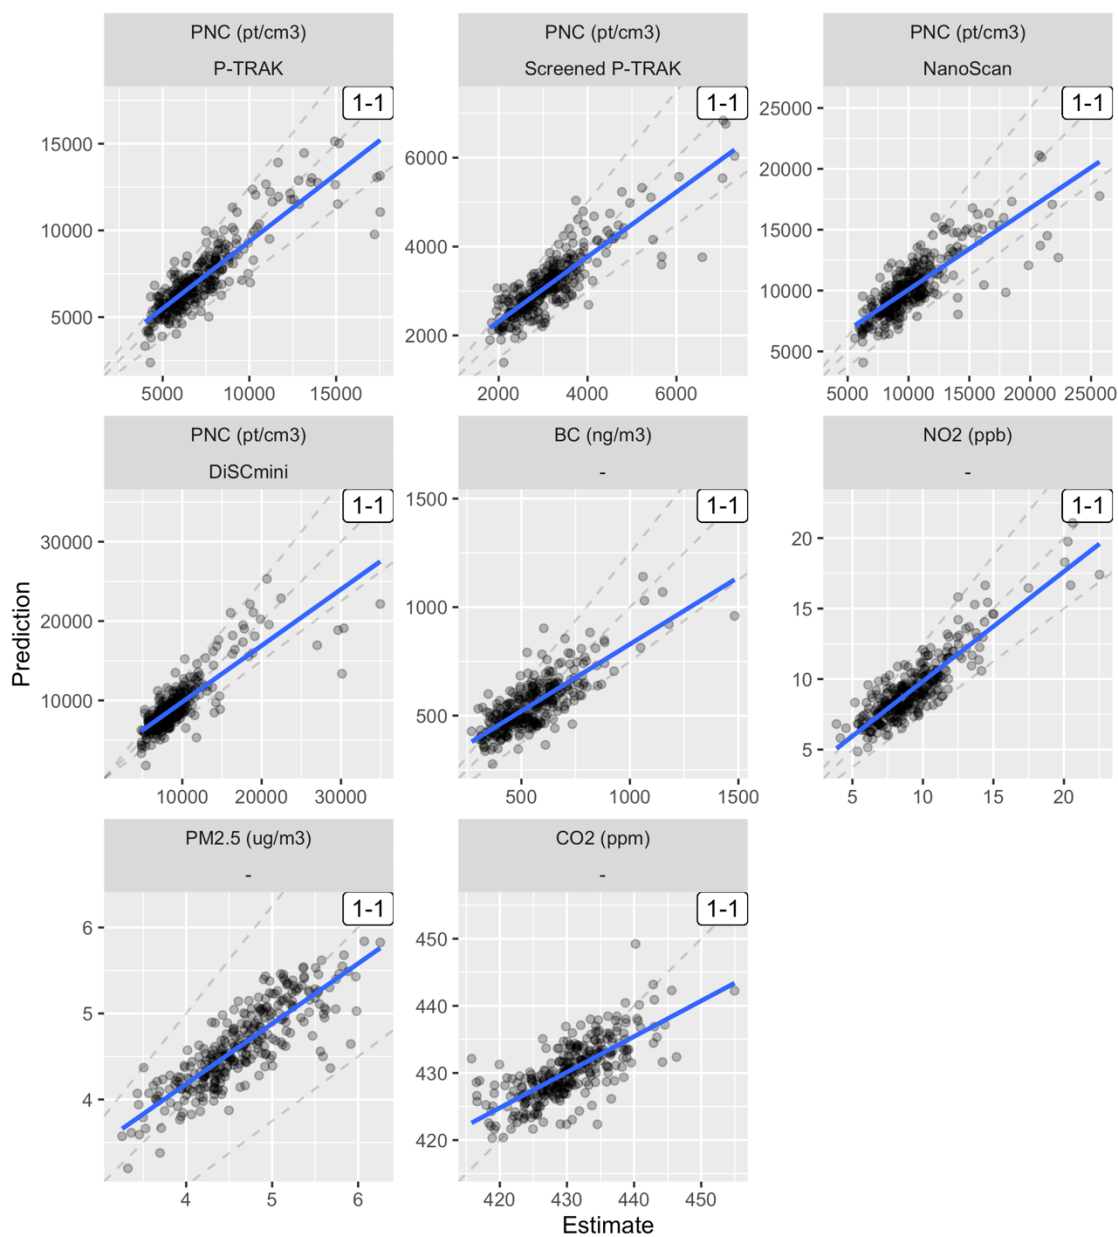

Figure S19. UK-PLS model predictions of annual average pollutant concentrations. Dashed lines indicate the 1-1 line, as well as 25% above and below (note that CO<sub>2</sub> has a narrow range). The blue line shows the best fit line.



Table S9. Out-of-sample (OOS) model performances for annual average prediction models at cross-validation (CV; N=278) and test (N=31) sites. The mean of winsorized medians is the primary analysis.

| Pollutant                              | OOS             |      | MSE-based R2               |                 |                   | RMSE                       |                 |                   |
|----------------------------------------|-----------------|------|----------------------------|-----------------|-------------------|----------------------------|-----------------|-------------------|
|                                        |                 |      | Mean of Winsorized Medians | Mean of Medians | Median of Medians | Mean of Winsorized Medians | Mean of Medians | Median of Medians |
| PNC (pt/cm <sup>3</sup> )              | P-TRAK          | CV   | 0.77                       | 0.74            | 0.79              | 1177                       | 1320            | 884               |
| PNC (pt/cm <sup>3</sup> )              | P-TRAK          | Test | 0.78                       | 0.75            | 0.76              | 815                        | 882             | 810               |
| PNC (pt/cm <sup>3</sup> )              | Screened P-TRAK | CV   | 0.72                       | 0.48            | 0.71              | 473                        | 738             | 390               |
| PNC (pt/cm <sup>3</sup> )              | Screened P-TRAK | Test | 0.80                       | 0.74            | 0.82              | 303                        | 363             | 253               |
| PNC (pt/cm <sup>3</sup> )              | NanoScan        | CV   | 0.65                       | 0.47            | 0.69              | 1819                       | 2596            | 1404              |
| PNC (pt/cm <sup>3</sup> )              | NanoScan        | Test | 0.75                       | 0.61            | 0.74              | 1027                       | 1327            | 994               |
| PNC (pt/cm <sup>3</sup> )              | DiSCmini        | CV   | 0.69                       | 0.44            | 0.74              | 2339                       | 3807            | 1304              |
| PNC (pt/cm <sup>3</sup> )              | DiSCmini        | Test | 0.63                       | 0.42            | 0.74              | 1390                       | 1788            | 1100              |
| BC (ng/m <sup>3</sup> )                | -               | CV   | 0.60                       | 0.60            | 0.58              | 102                        | 110             | 78                |
| BC (ng/m <sup>3</sup> )                | -               | Test | 0.80                       | 0.61            | 0.59              | 60                         | 94              | 60                |
| NO <sub>2</sub> (ppb)                  | -               | CV   | 0.77                       | 0.77            | 0.72              | 1.3                        | 1.3             | 1.4               |
| NO <sub>2</sub> (ppb)                  | -               | Test | 0.84                       | 0.85            | 0.72              | 0.9                        | 0.8             | 1.1               |
| PM <sub>2.5</sub> (µg/m <sup>3</sup> ) | -               | CV   | 0.70                       | 0.60            | 0.62              | 0.3                        | 0.4             | 0.3               |

|                                           |   |      |      |      |      |     |     |     |
|-------------------------------------------|---|------|------|------|------|-----|-----|-----|
| PM <sub>2.5</sub><br>(µg/m <sup>3</sup> ) | - | Test | 0.73 | 0.58 | 0.71 | 0.3 | 0.4 | 0.2 |
| CO <sub>2</sub><br>(ppm)                  | - | CV   | 0.51 | 0.51 | 0.37 | 4.2 | 4.2 | 4.4 |
| CO <sub>2</sub><br>(ppm)                  | - | Test | 0.77 | 0.77 | 0.38 | 2.7 | 2.8 | 4.3 |

---

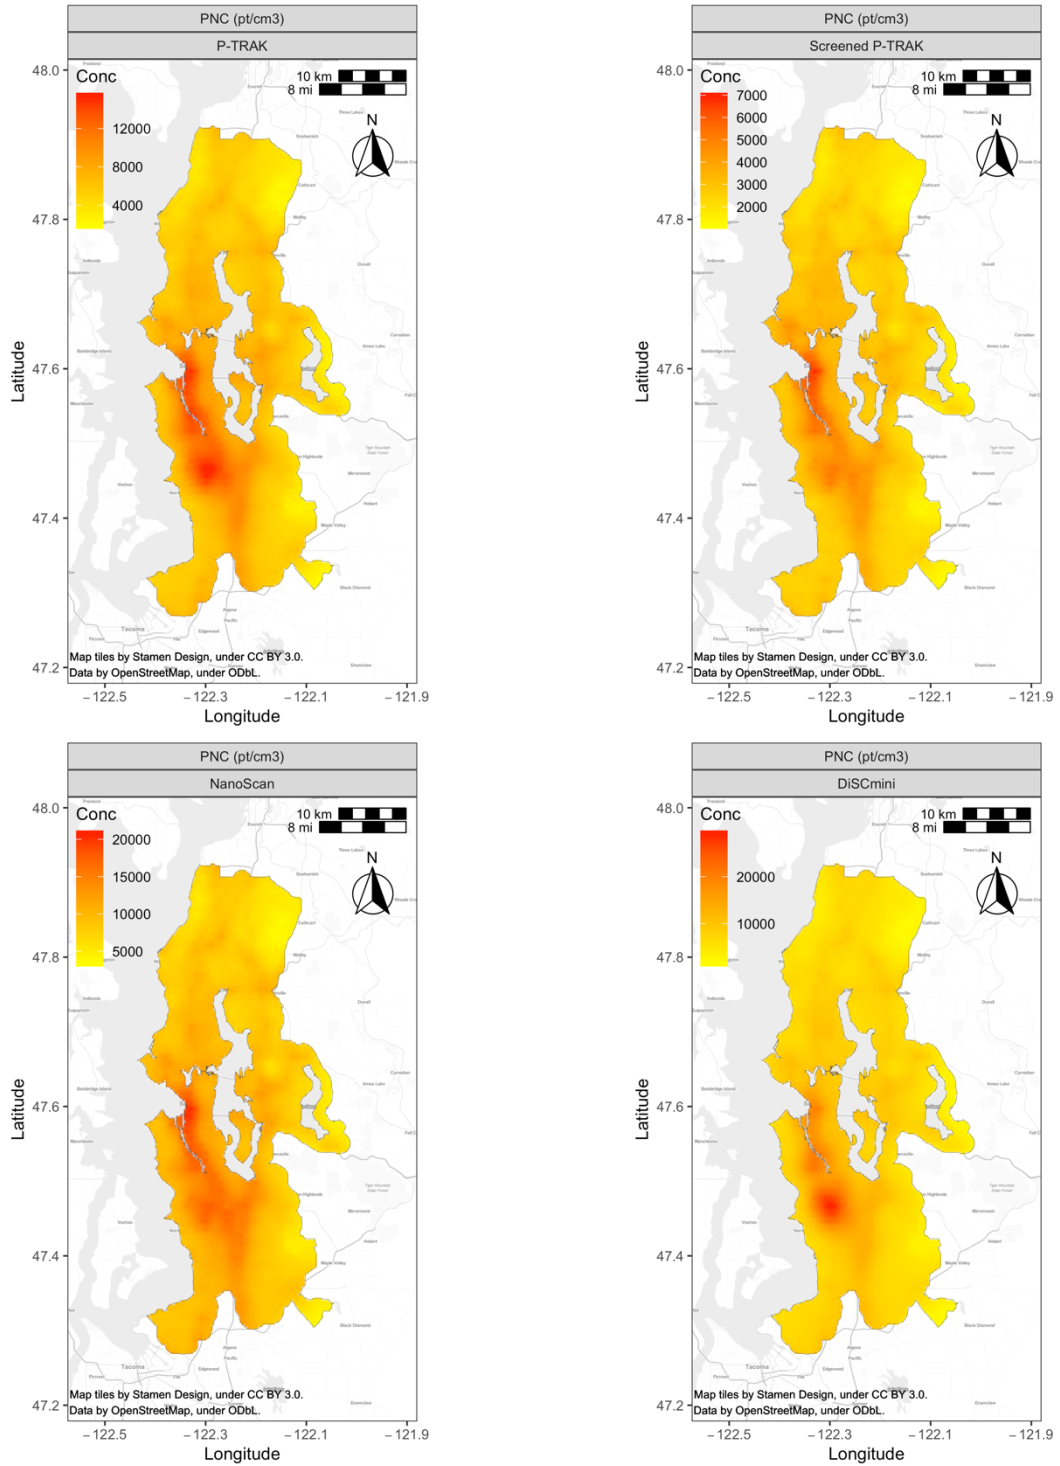

Figure S20. UK-PLS pollutant predictions within the monitoring region for all PNC instruments. The P-TRAK is the primary PNC instrument.

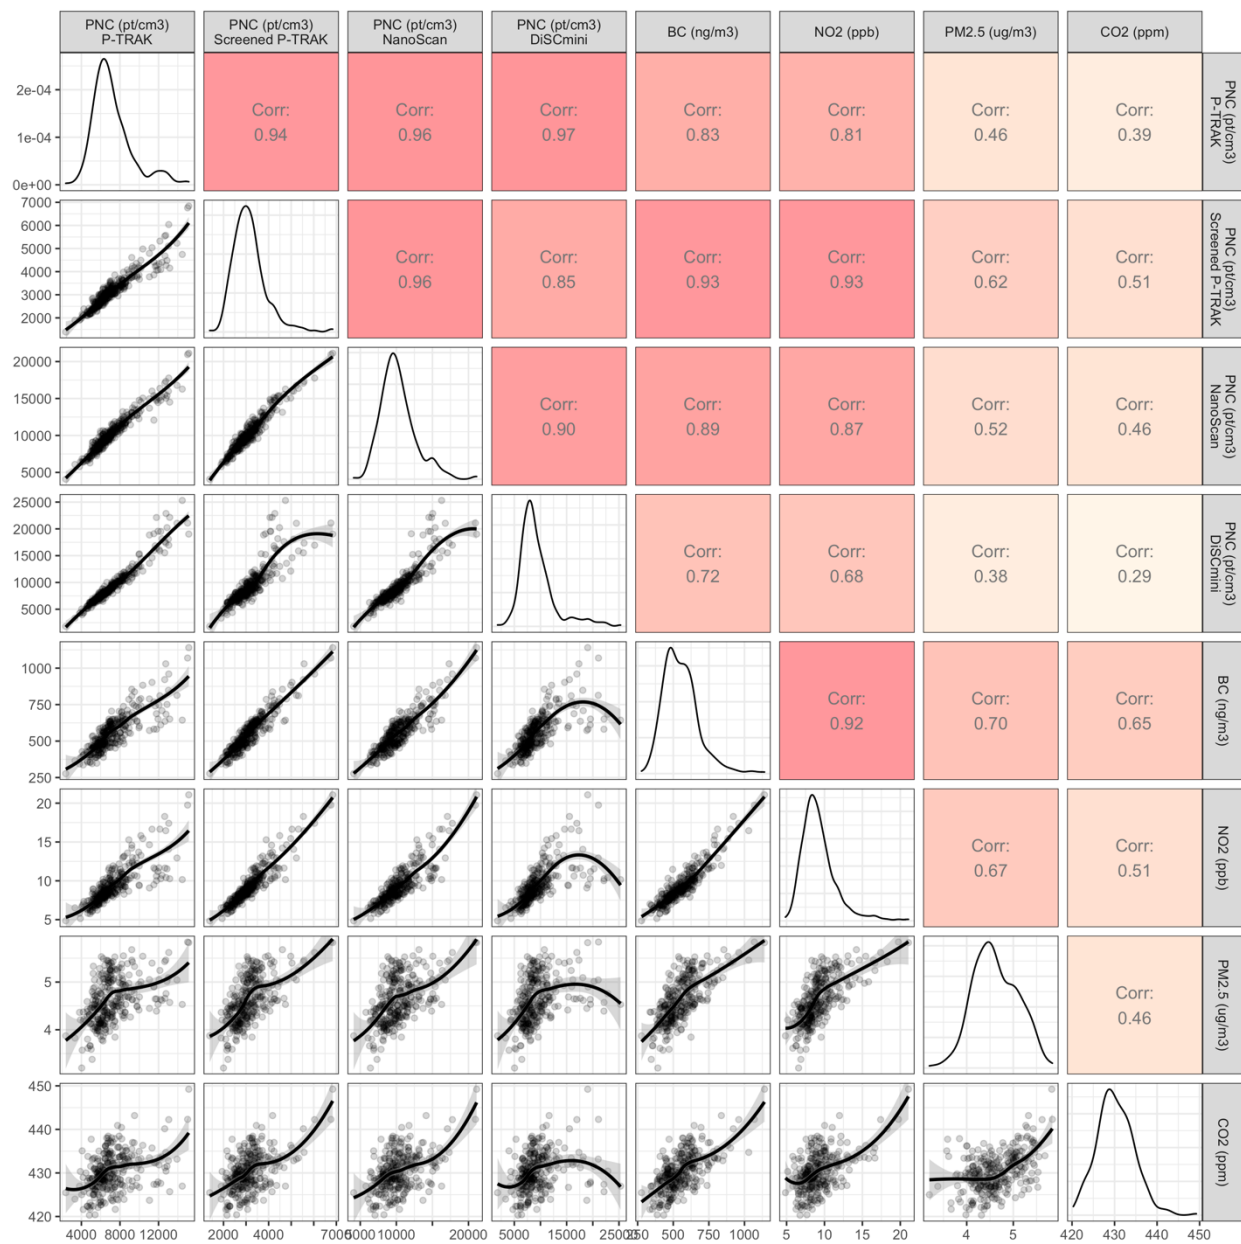

Figure S21. Annual average pollutant prediction correlations ( $N=309$  sites). Lower panels show scatterplots with loess lines and 95% confidence intervals; upper panels show Pearson correlations ( $R$ ), with higher values in darker reds; diagonal panels show density plots.

### S3 Discussion

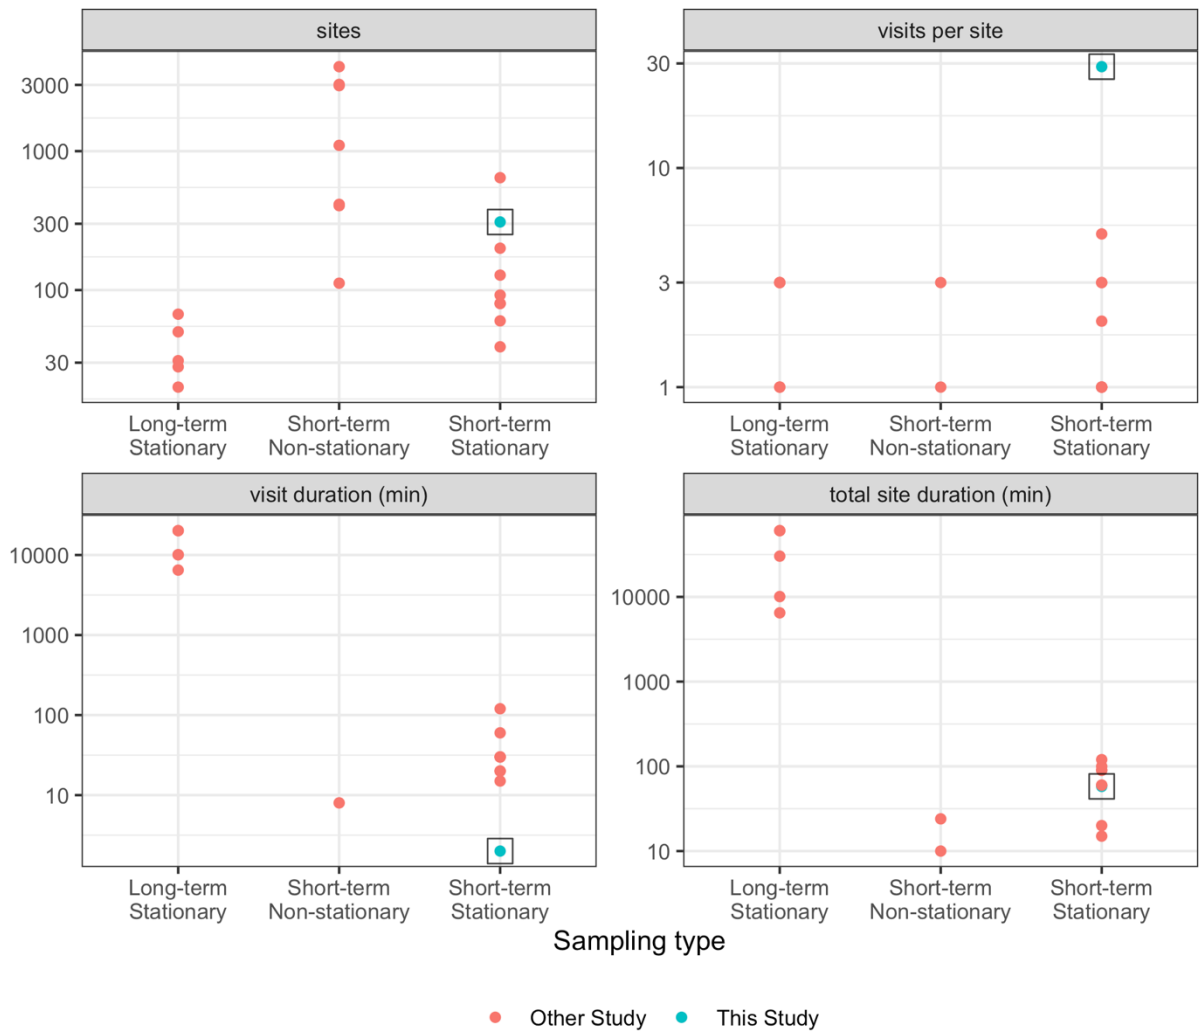

Figure S22. Sampling approaches across our and other PNC studies.<sup>46–69</sup> Studies are stratified by whether the sampling type was traditional, fixed site sampling (long-term stationary), short-term mobile monitoring campaigns that collected on-road data while in motion (short-term non-stationary), or short-term mobile monitoring campaigns that collected data while stopped (short-term stationary). Figure does not include Saha et al. (2021), who used a mixed sampling approach for PNC from multiple sources.<sup>70</sup> Note that little data were available for short-term non-stationary studies regarding visit duration, total site duration or visits per site. The single study under short-term non-stationary visit duration of ~ 8 min was conducted with pedestrians (Sabaliauskas et al. 2015).

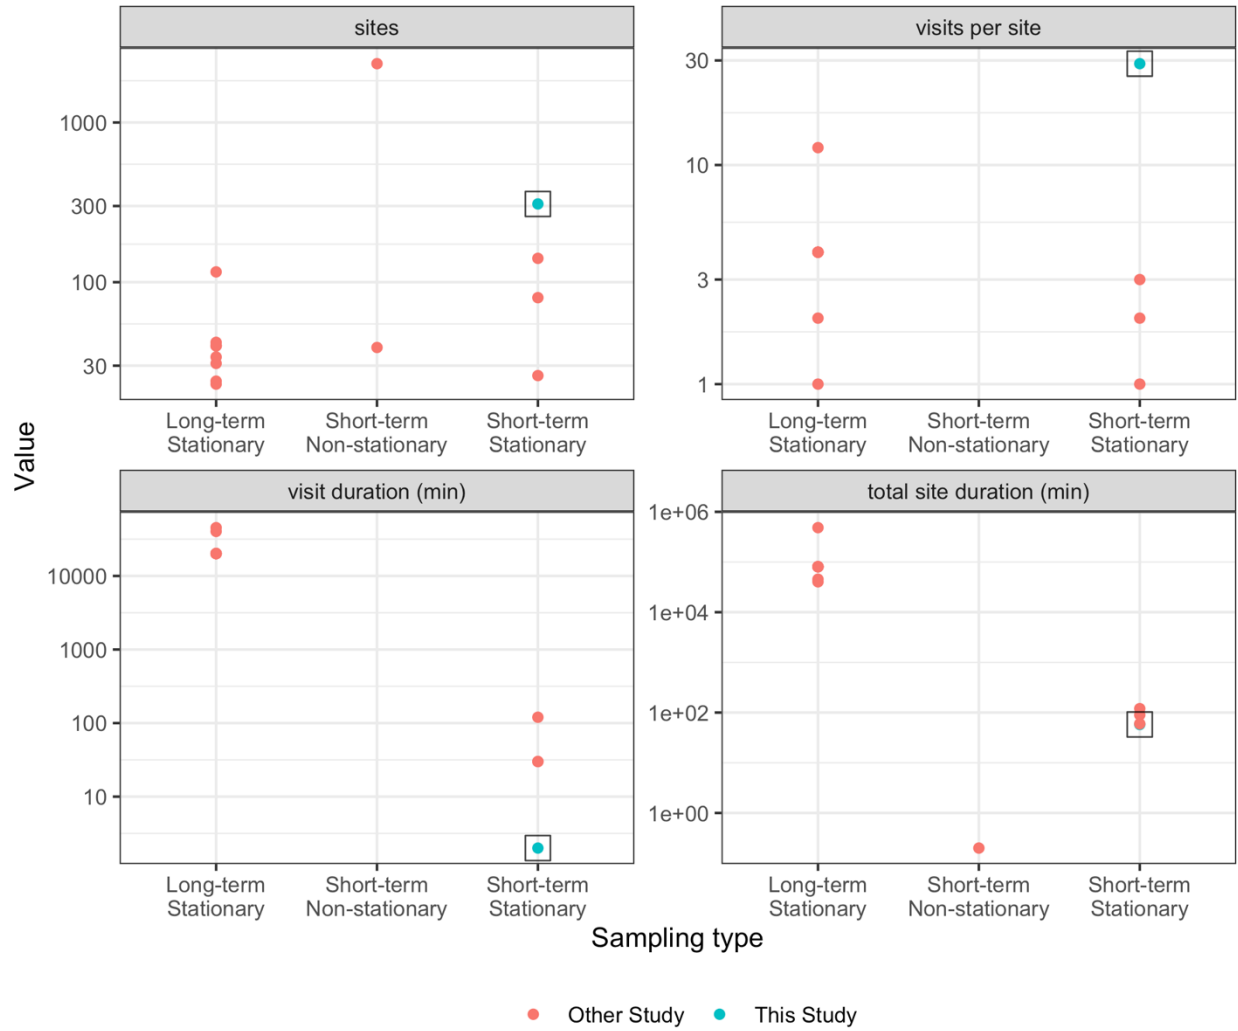

Figure S23 Sampling approaches across other BC studies.<sup>46,51,56,61,62,71–81</sup> Studies are stratified by whether the sampling type was traditional, fixed site sampling (long-term stationary), short-term mobile monitoring campaigns that collected on-road data while in motion (short-term non-stationary), or short-term mobile monitoring campaigns that collected data while stopped (short-term stationary). Note that little data were available for short-term non-stationary studies regarding visit duration, total site duration or visits per site.

## S4 References

1. US Census. TIGER/Line Shapefile, 2017, 2010 nation, U.S., 2010 Census Urban Area National. Published online 2021. Accessed April 29, 2021. <https://catalog.data.gov/dataset/tiger-line-shapefile-2017-2010-nation-u-s-2010-census-urban-area-national>
2. Esri. *ArcGIS Desktop*. Esri; 2019. <https://www.esri.com/about/newsroom/overview/?rmedium=NewsFallback&rsource=blogs.esri.com/Support/blogs/mappingcenter/archive/2010/12/03/using-and-citing-esri-data.aspx>
3. Google. *Google Maps*. Google Inc.; 2019. <https://www.maps.google.com>
4. Oracle Corporation. *MySQL*.; 2021. <https://dev.mysql.com>
5. R Core Team. R: A Language and Environment for Statistical Computing. R Foundation for Statistical Computing. Published 2019. <https://www.r-project.org>
6. Robinson D, Hayes A. *Broom: Convert Statistical Analysis Objects into Tidy Tibbles*.; 2020. <https://CRAN.R-project.org/package=broom>
7. Zeileis A, Fisher JC, Hornik K, et al. *Colorspace: A Toolbox for Manipulating and Assessing Colors and Palettes*. arXiv.org E-Print Archive; 2019. <http://arxiv.org/abs/1903.06490>
8. Wilke CO. *Cowplot: Streamlined Plot Theme and Plot Annotations for "Ggplot2."*; 2019. <https://CRAN.R-project.org/package=cowplot>
9. Wickham H, François R, Henry L, Müller K. *Dplyr: A Grammar of Data Manipulation*.; 2021. <https://CRAN.R-project.org/package=dplyr>
10. Nakazawa M. *Fmsb: Functions for Medical Statistics Book with Some Demographic Data*.; 2021. <https://CRAN.R-project.org/package=fmsb>
11. Wickham H. *Forcats: Tools for Working with Categorical Variables (Factors)*.; 2020. <https://CRAN.R-project.org/package=forcats>
12. Schloerke B, Cook D, Larmarange J, et al. *GGally: Extension to "Ggplot2."*; 2021. <https://CRAN.R-project.org/package=GGally>
13. Kahle D, Wickham H. ggmap: Spatial Visualization with ggplot2. *R J*. 2013;5(1):144-161.
14. Wickham H. *Ggplot2: Elegant Graphics for Data Analysis*. Springer-Verlag New York; 2016. <https://ggplot2.tidyverse.org>

15. Aphalo PJ. *Ggpmisc: Miscellaneous Extensions to “Ggplot2.”*; 2021. <https://CRAN.R-project.org/package=ggpmisc>
16. Aphalo PJ. *Ggpp: Grammar Extensions to “Ggplot2.”*; 2021. <https://CRAN.R-project.org/package=ggpp>
17. Kassambara A. *Ggpubr: “ggplot2” Based Publication Ready Plots.*; 2020. <https://CRAN.R-project.org/package=ggpubr>
18. Slowikowski K. *Ggrepel: Automatically Position Non-Overlapping Text Labels with “Ggplot2.”*; 2019. <https://CRAN.R-project.org/package=ggrepel>
19. Dunnington D. *Ggspatial: Spatial Data Framework for Ggplot2.*; 2020. <https://CRAN.R-project.org/package=ggspatial>
20. Pebesma E, Graeler B. *Gstat: Spatial and Spatio-Temporal Geostatistical Modelling, Prediction and Simulation.*; 2021. <https://CRAN.R-project.org/package=gstat>
21. Zhu H. *KableExtra: Construct Complex Table with “kable” and Pipe Syntax.*; 2019. <https://CRAN.R-project.org/package=kableExtra>
22. Xie Y. *Knitr: A General-Purpose Package for Dynamic Report Generation in R.*; 2020. <https://CRAN.R-project.org/package=knitr>
23. Golemund G, Wickham H. Dates and Times Made Easy with lubridate. *J Stat Softw.* 2011;40(3):1-25.
24. Bache SM, Wickham H. *Magrittr: A Forward-Pipe Operator for R.*; 2014. <https://CRAN.R-project.org/package=magrittr>
25. Mevik BH, Wehrens R, Liland KH. *Pls: Partial Least Squares and Principal Component Regression.*; 2019. <https://CRAN.R-project.org/package=pls>
26. Henry L, Wickham H. *Purrr: Functional Programming Tools.*; 2019. <https://CRAN.R-project.org/package=purrr>
27. Wickham H, Hester J, Francois R. *Readr: Read Rectangular Text Data.*; 2018. <https://CRAN.R-project.org/package=readr>
28. Pebesma E. *Sf: Simple Features for R.*; 2020. <https://CRAN.R-project.org/package=sf>
29. Bivand R, Nowosad J, Lovelace R. *SpData: Datasets for Spatial Analysis.*; 2021. <https://CRAN.R-project.org/package=spData>
30. Wickham H. *Stringr: Simple, Consistent Wrappers for Common String Operations.*; 2019. <https://CRAN.R-project.org/package=stringr>



31. Müller K, Wickham H. *Tibble: Simple Data Frames.*; 2021. <https://CRAN.R-project.org/package=tibble>
32. Wickham H, Henry L. *Tidyr: Tidy Messy Data.*; 2020. <https://CRAN.R-project.org/package=tidyr>
33. Wickham H, Averick M, Bryan J, et al. Welcome to the tidyverse. *J Open Source Softw.* 2019;4(43):1686. doi:10.21105/joss.01686
34. Pebesma E, Mailund T, Kalinowski T. *Units: Measurement Units for R Vectors.*; 2020. <https://CRAN.R-project.org/package=units>
35. Schuetzenmeister A, Dufey F. *VCA: Variance Component Analysis.*; 2019. <https://CRAN.R-project.org/package=VCA>
36. Stamen Design. Published 2021. <http://maps.stamen.com/#terrain/12/37.7707/-122.3783>
37. Creative Commons. Attribution 3.0 Unprotected (CC BY 3.0). Published 2021. <https://creativecommons.org/licenses/by/3.0/>
38. OpenStreetMap contributors. Published 2021. <https://www.openstreetmap.org/copyright>
39. Good N, Mölter A, Peel JL, Volckens J. An accurate filter loading correction is essential for assessing personal exposure to black carbon using an Aethalometer. *J Expo Sci Environ Epidemiol.* 2017;27(4):409-416. doi:10.1038/jes.2016.71
40. Stampfer O, Austin E, Ganuelas T, Fiander T, Seto E, Karr CJ. Use of low-cost PM monitors and a multi-wavelength aethalometer to characterize PM<sub>2.5</sub> in the Yakama Nation reservation. *Atmos Environ.* 2020;224:117292. doi:10.1016/j.atmosenv.2020.117292
41. Anderson TL, Ogren JA. Determining aerosol radiative properties using the TSI 3563 integrating nephelometer. *Aerosol Sci Technol.* 1998;29(1):57-69.
42. Hibbert DB. The uncertainty of a result from a linear calibration. *Analyst.* 2006;131(12):1273-1278.
43. Tellinghuisen J. Inverse vs. classical calibration for small data sets. *Fresenius J Anal Chem.* 2000;368(6):585-588. doi:10.1007/s002160000556
44. Austin E, Xiang J, Gould TR, et al. Distinct Ultrafine Particle Profiles Associated with Aircraft and Roadway Traffic. *Environ Sci Technol.* 2021;55(5):2847-2858. doi:10.1021/acs.est.0c05933
45. Keller JP, Olives C, Kim SY, et al. A unified spatiotemporal modeling approach for predicting concentrations of multiple air pollutants in the multi-ethnic study of

- atherosclerosis and air pollution. *Environ Health Perspect.* 2015;123(4):301-309. doi:10.1289/ehp.1408145
46. Kerckhoffs J, Hoek G, Messier KP, et al. Comparison of ultrafine particle and black carbon concentration predictions from a mobile and short-term stationary land-use regression model. *Environ Sci Technol.* 2016;50(23):12894-12902. doi:10.1021/acs.est.6b03476
  47. Kerckhoffs J, Hoek G, Gehring U, Vermeulen R. Modelling nationwide spatial variation of ultrafine particles based on mobile monitoring. *Environ Int.* 2021;154:106569. doi:10.1016/j.envint.2021.106569
  48. Minet L, Liu R, Valois MF, Xu J, Weichenthal S, Hatzopoulou M. Development and Comparison of Air Pollution Exposure Surfaces Derived from On-Road Mobile Monitoring and Short-Term Stationary Sidewalk Measurements. *Environ Sci Technol.* 2018;52(6):3512-3519. doi:10.1021/acs.est.7b05059
  49. Abernethy RC, Allen RW, McKendry IG, Brauer M. A land use regression model for ultrafine particles in Vancouver, Canada. *Environ Sci Technol.* 2013;47(10):5217-5225.
  50. Farrell W, Weichenthal S, Goldberg M, Valois MF, Shekarrizfard M, Hatzopoulou M. Near roadway air pollution across a spatially extensive road and cycling network. *Environ Pollut.* 2016;212:498-507. doi:https://doi.org/10.1016/j.envpol.2016.02.041
  51. Montagne DR, Hoek G, Klompaker JO, Wang M, Meliefste K, Brunekreef B. Land Use Regression Models for Ultrafine Particles and Black Carbon Based on Short-Term Monitoring Predict Past Spatial Variation. *Environ Sci Technol.* 2015;49(14):8712-8720. doi:10.1021/es505791g
  52. Patton AP, Zamore W, Naumova EN, Levy JI, Brugge D, Durant JL. Transferability and generalizability of regression models of ultrafine particles in urban neighborhoods in the boston area. *Environ Sci Technol.* 2015;49(10):6051-6060. doi:10.1021/es5061676
  53. Ragettli MS, Ducret-Stich RE, Foraster M, et al. Spatio-temporal variation of urban ultrafine particle number concentrations. *Atmos Environ.* 2014;96:275-283. doi:10.1016/j.atmosenv.2014.07.049
  54. Rivera M, Basagaña X, Aguilera I, et al. Spatial distribution of ultrafine particles in urban settings: A land use regression model. *Atmos Environ.* 2012;54:657-666. doi:10.1016/j.atmosenv.2012.01.058
  55. Saha PK, Zimmerman N, Malings C, et al. Quantifying high-resolution spatial variations and local source impacts of urban ultrafine particle concentrations. *Sci Total Environ.* 2019;655:473-481. doi:https://doi.org/10.1016/j.scitotenv.2018.11.197

56. Saraswat A, Apte JS, Kandlikar M, Brauer M, Henderson SB, Marshall JD. Spatiotemporal land use regression models of fine, ultrafine, and black carbon particulate matter in New Delhi, India. *Environ Sci Technol*. 2013;47(22):12903-12911. doi:10.1021/es401489h
57. Simon MC, Patton AP, Naumova EN, et al. Combining Measurements from Mobile Monitoring and a Reference Site to Develop Models of Ambient Ultrafine Particle Number Concentration at Residences. *Environ Sci Technol*. 2018;52(12):6985-6995. doi:10.1021/acs.est.8b00292
58. van Nunen E, Vermeulen R, Tsai MY, et al. Land use regression models for ultrafine particles in six European areas. *Environ Sci Technol*. 2017;51(6):3336-3345.
59. Weichenthal S, Ryswyk K Van, Goldstein A, Bagg S, Shekarrizfard M, Hatzopoulou M. A land use regression model for ambient ultrafine particles in Montreal, Canada: A comparison of linear regression and a machine learning approach. *Environ Res*. 2016;146:65-72. doi:10.1016/j.envres.2015.12.016
60. Weichenthal S, Van Ryswyk K, Goldstein A, Shekarrizfard M, Hatzopoulou M. Characterizing the spatial distribution of ambient ultrafine particles in Toronto, Canada: A land use regression model. *Environ Pollut*. Published online 2016. doi:10.1016/j.envpol.2015.04.011
61. Yu CH, Fan Z, Lioy PJ, Baptista A, Greenberg M, Laumbach RJ. A novel mobile monitoring approach to characterize spatial and temporal variation in traffic-related air pollutants in an urban community. *Atmos Environ*. 2016;141:161-173. doi:10.1016/j.atmosenv.2016.06.044
62. Hankey S, Marshall JD. Land Use Regression Models of On-Road Particulate Air Pollution (Particle Number, Black Carbon, PM<sub>2.5</sub>, Particle Size) Using Mobile Monitoring. *Environ Sci Technol*. 2015;49(15):9194-9202. doi:10.1021/acs.est.5b01209
63. Saha PK, Li HZ, Apte JS, Robinson AL, Presto AA. Urban Ultrafine Particle Exposure Assessment with Land-Use Regression: Influence of Sampling Strategy. *Environ Sci Technol*. 2019;53:7326-7336. doi:10.1021/acs.est.9b02086
64. Sabaliauskas K, Jeong CH, Yao X, Reali C, Sun T, Evans GJ. Development of a land-use regression model for ultrafine particles in Toronto, Canada. *Atmos Environ*. 2015;110:84-92. doi:10.1016/j.atmosenv.2015.02.018
65. Beelen R, Hoek G, Vienneau D, et al. Development of NO<sub>2</sub> and NO<sub>x</sub> land use regression models for estimating air pollution exposure in 36 study areas in Europe – The ESCAPE project. *Atmospheric Environ 1994*. 2013;72:10-23. doi:10.1016/j.atmosenv.2013.02.037
66. Wolf K, Cyrus J, Harciníková T, et al. Land use regression modeling of ultrafine particles, ozone, nitrogen oxides and markers of particulate matter pollution in Augsburg, Germany. *Sci Total Environ*. 2017;579:1531-1540. doi:10.1016/j.scitotenv.2016.11.160

67. Cattani G, Gaeta A, Di Menno di Bucchianico A, et al. Development of land-use regression models for exposure assessment to ultrafine particles in Rome, Italy. *Atmos Environ*. 2017;156:52-60. doi:<https://doi.org/10.1016/j.atmosenv.2017.02.028>
68. Hoek G, Beelen R, Kos G, et al. Land Use Regression Model for Ultrafine Particles in Amsterdam. *Environ Sci Technol*. 2011;45(2):622-628. doi:10.1021/es1023042
69. Eeftens M, Meier R, Schindler C, et al. Development of land use regression models for nitrogen dioxide, ultrafine particles, lung deposited surface area, and four other markers of particulate matter pollution in the Swiss SAPALDIA regions. *Environ Health Glob Access Sci Source*. 2016;15(1):1-14. doi:10.1186/s12940-016-0137-9
70. Saha PK, Hankey S, Marshall JD, Robinson AL, Presto AA. High-Spatial-Resolution Estimates of Ultrafine Particle Concentrations across the Continental United States. *Environ Sci Technol*. Published online July 21, 2021. doi:10.1021/acs.est.1c03237
71. Beelen R, Hoek G, Fischer P, van den Brandt PA, Brunekreef B. Estimated long-term outdoor air pollution concentrations in a cohort study. *Atmospheric Environ* 1994. 2007;41(26):1343-1358.
72. Brauer M, Hoek G, Vliet P van, et al. Estimating Long-Term Average Particulate Air Pollution Concentrations: Application of Traffic Indicators and Geographic Information Systems. *Epidemiol Camb Mass*. 2003;14(2):228-239. doi:10.1097/01.EDE.0000041910.49046.9B
73. Carr D, von Ehrenstein O, Weiland S, et al. Modeling annual benzene, toluene, NO<sub>2</sub>, and soot concentrations on the basis of road traffic characteristics. *Environ Res*. 2002;90(2):111-118. doi:10.1006/enrs.2002.4393
74. Dodson RE, Houseman EA, Morin B, Levy JI. An analysis of continuous black carbon concentrations in proximity to an airport and major roadways. *Atmos Environ*. 2009;43(24):3764-3773.
75. Henderson SB, Beckerman B, Jerrett M, Brauer M. Application of Land Use Regression to Estimate Long-Term Concentrations of Traffic-Related Nitrogen Oxides and Fine Particulate Matter. *Environ Sci Technol*. 2007;41(7):2422-2428. doi:10.1021/es0606780
76. Hochadel M, Heinrich J, Gehring U, et al. Predicting long-term average concentrations of traffic-related air pollutants using GIS-based information. *Atmospheric Environ* 1994. 2006;40(3):542-553. doi:10.1016/j.atmosenv.2005.09.067
77. Larson T, Su J, Baribeau AM, Buzzelli M, Setton E, Brauer M. A spatial model of urban winter woodsmoke concentrations. *Environ Sci Technol*. 2007;41(7):2429-2436.

78. Larson T, Henderson SB, Brauer M. Mobile monitoring of particle light absorption coefficient in an urban area as a basis for land use regression. *Environ Sci Technol.* 2009;43(13):4672-4678. doi:10.1021/es803068e
79. Morgenstern V, Zutavern A, Cyrus J, et al. Respiratory health and individual estimated exposure to traffic-related air pollutants in a cohort of young children. *Occup Environ Med.* 2007;64(1):8-16. doi:10.1136/oem.2006.028241
80. Ryan PH, LeMasters GK, Biswas P, et al. A Comparison of Proximity and Land Use Regression Traffic Exposure Models and Wheezing in Infants. *Environ Health Perspect.* 2007;115(2):278-284. doi:10.1289/ehp.9480
81. Su JG, Allen G, Miller PJ, Brauer M. Spatial modeling of residential woodsmoke across a non-urban upstate New York region. *Air Qual Atmosphere Health.* 2013;6(1):85-94. doi:10.1007/s11869-011-0148-1
